# Supplementary material for: A computational mechanistic study on the Ni-catalyzed asymmetric alkynyl propyl hydroxyaminations: origin of enantioselectivity and further rational design
Source: Royal Society of Chemistry journal article supplement (doi:10.1039/d4nj02179g), 2024-01-01
Supplement: d4nj02179g1.pdf [file d4nj02179g1.pdf]

## SUPPORTING INFORMATION

A Computational mechanistic study on the Ni-Catalyzed  
Asymmetric Alkynyl Propyl Hydroxyaminations: Origin of  
Enantioselectivity and Further Rational Design

### Content

|                 |    |
|-----------------|----|
| Figure S1.....  | 2  |
| Table S1.....   | 2  |
| Figure S2.....  | 3  |
| Figure S3.....  | 3  |
| Figure S4.....  | 4  |
| Figure S5.....  | 5  |
| Figure S6.....  | 6  |
| Table S2.....   | 6  |
| Figure S7.....  | 7  |
| Figure S8.....  | 8  |
| Table S3.....   | 9  |
| Figure S9.....  | 9  |
| Figure S10..... | 10 |
| Table S4.....   | 11 |

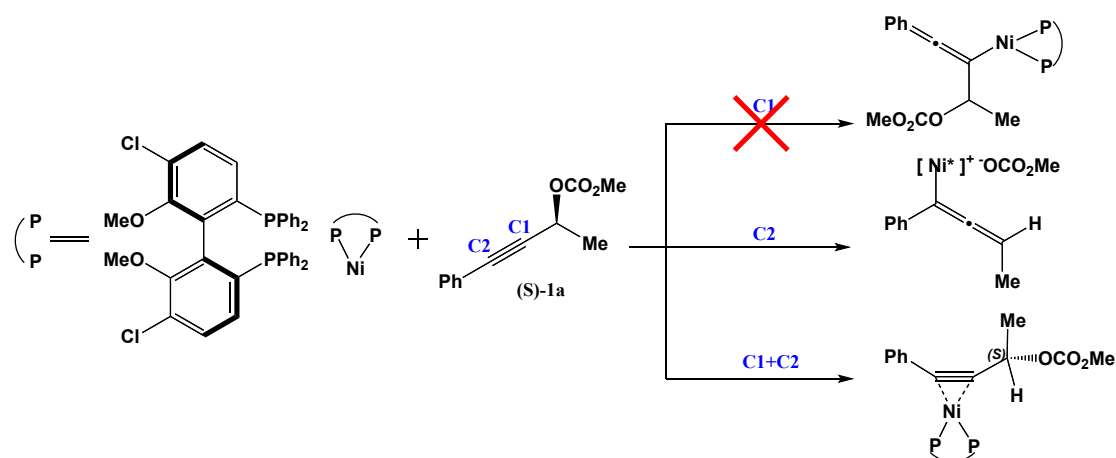

**Figure S1.** Three possible scenarios for the combination of nickel-phosphine- catalyst and substrate (S)-1a.

**Table S1.** Calculated Gibbs free energy barriers (in kcal mol<sup>-1</sup>) on the rate-determining-step using different functionals.

| Different computational levels                                                                                   | $\Delta G^\ddagger(\text{TS3A})$ | $\Delta G^\ddagger(\text{TS3B})$ | $\Delta\Delta G^\ddagger$ |
|------------------------------------------------------------------------------------------------------------------|----------------------------------|----------------------------------|---------------------------|
| BP86+D3(BJ)/def2-TZVPP(IEFPCM, solvent=1,4-Dioxane)<br>//BP86+ D3(BJ)/def2-SVP(IEFPCM, solvent = 1,4-Dioxane)    | 21.4                             | 22.9                             | 1.5                       |
| M06-L/def2-TZVPP(IEFPCM, solvent=1,4-Dioxane)<br>//BP86+ D3(BJ)/def2-SVP(IEFPCM, solvent = 1,4-Dioxane)          | 21.5                             | 22.9                             | 1.4                       |
| B97D+D3(BJ)/def2-TZVPP(IEFPCM, solvent=1,4-Dioxane)<br>//BP86+ D3(BJ)/def2-SVP(IEFPCM, solvent = 1,4-Dioxane)    | 20.5                             | 22.1                             | 1.6                       |
| B3PW91+D3(BJ)/def2-TZVPP(IEFPCM, solvent=1,4-Dioxane)<br>//B3PW91+D3(BJ)/def2-SVP(IEFPCM, solvent = 1,4-Dioxane) | 27.4                             | 28.5                             | 1.1                       |
| B3LYP+D3(BJ)/def2-TZVPP(IEFPCM, solvent=1,4-Dioxane)<br>//BP86+ D3(BJ)/def2-SVP(IEFPCM, solvent = 1,4-Dioxane)   | 27.8                             | 28.8                             | 1.0                       |

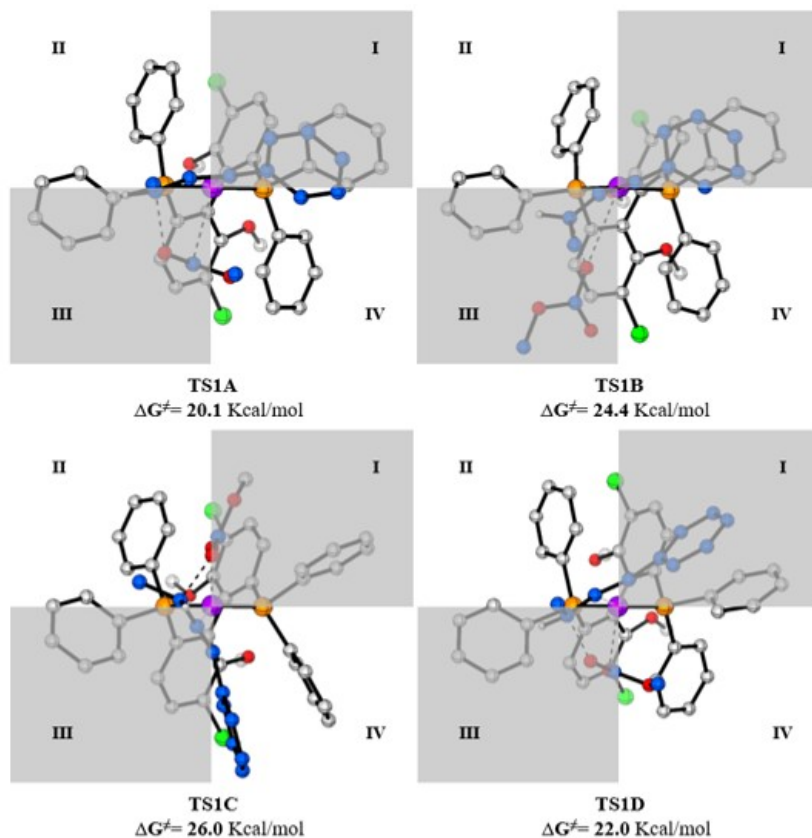

**Figure S2.** The geometry of the four optimized TS1 transition states is shown in the quadrant plot, with some hydrogen atoms omitted for clarity and selected bond distances given in Å (color code, C: gray, O: red, P: yellow, Ni: Purple, Cl: green). To highlight the differences in spatial configurations, the (S)-1a section has been highlighted in blue.

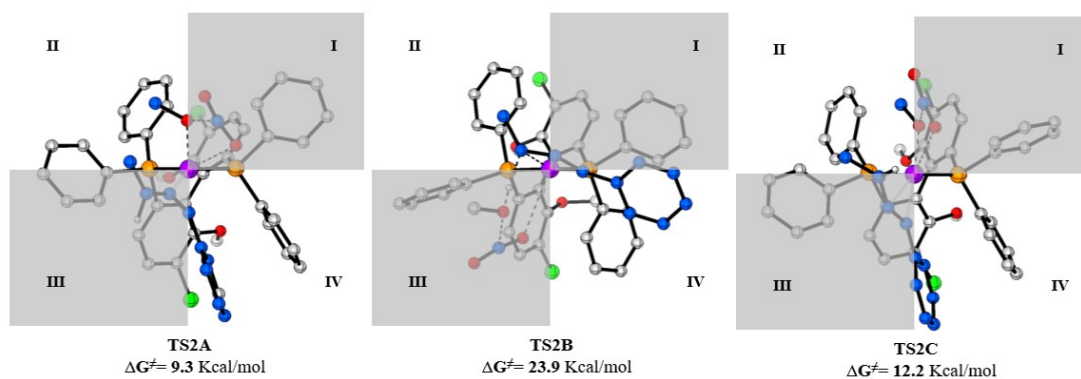

**Figure S3.** The geometry of the four optimized TS2 transition states is shown in the quadrant plot, with some hydrogen atoms omitted for clarity and selected bond distances given in Å (color code, C: gray, O: red, P: yellow, Ni: Purple, Cl: green). To highlight the differences in spatial configurations, the (S)-1a section has been highlighted in blue.

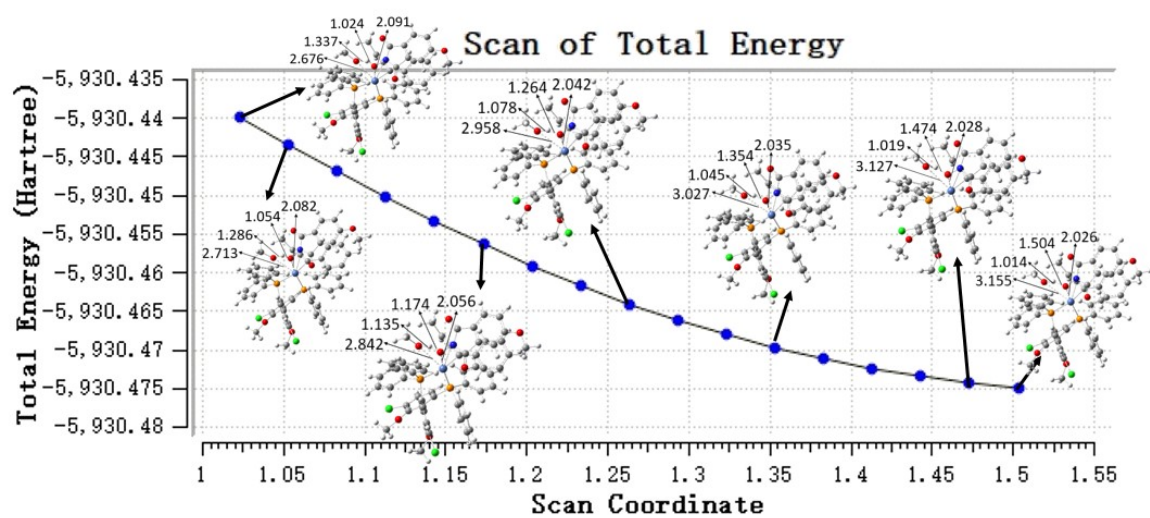

**Figure S4.** Scan of potential energy surface of the asymmetric Propargylic substitution from **IM5A** to **IM6A**.

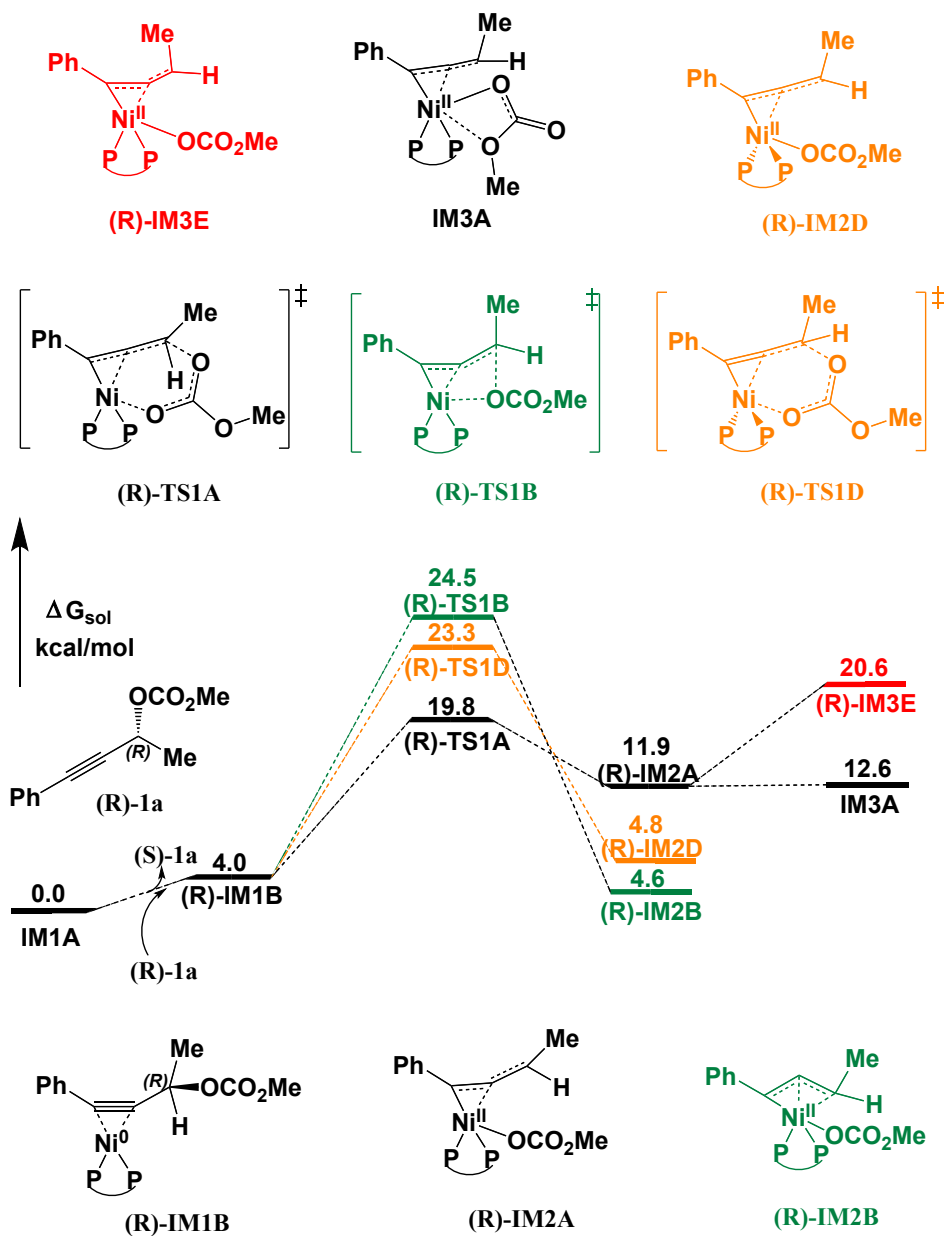

Figure S5 Gibbs free energy (in kcal/mol) profiles by using the reactant propyl carbonate ((R)-1a).

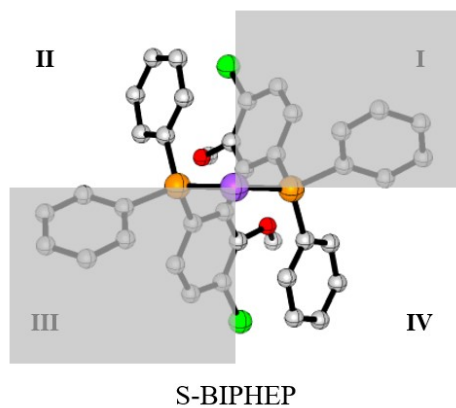

**Figure S6** Quadrant diagram of (S)-Cl-MeO-BIPHEP ligand, with some hydrogen atoms omitted for clarity and selected bond distances given in Å (color code, C: gray, O: red, P: yellow, Ni: Purple, Cl: green).

**Table S2.** EDA-NOCV results of (S)-TS3A at the BP86+(D3BJ)/TZ2P level of theory. Fragments are given in singlet (S) or triplet (T) electronic states. Energy values are given in kcal/mol.

| Fragment                         | (S)-L1/Ni-1a <sup>+</sup> (S) | (S)-L1/Ni-1a (D) |
|----------------------------------|-------------------------------|------------------|
|                                  | +2a <sup>+</sup> (S)          | +2a(D)           |
| $\Delta E_{\text{int}}$          | -99.5                         | -46.3            |
| $\Delta E_{\text{Pauli}}$        | 83.3                          | 80.8             |
| $\Delta E_{\text{disp}}^{[a]}$   | -21.2 (11.6%)                 | -21.2 (16.7%)    |
| $\Delta E_{\text{elstat}}^{[a]}$ | -99.2 (54.2%)                 | -34.8 (27.4%)    |
| $\Delta E_{\text{orb}}^{[a]}$    | -62.5 (34.2%)                 | -71.1 (55.9%)    |
| $\Delta E_{\text{orb1}}^{[b]}$   | -30.1 (48.2%)                 |                  |
| $\Delta E_{\text{orb2}}^{[b]}$   | -6.2 (9.9%)                   |                  |
| $\Delta E_{\text{orb3}}^{[b]}$   | -3.6(5.7%)                    |                  |
| $\Delta E_{\text{rest}}$         | -22.6 (36.3%)                 |                  |

<sup>a</sup>The values in parentheses give the percentage contribution to the total attractive interactions  $\Delta E_{\text{elstat}} + \Delta E_{\text{orb}} + \Delta E_{\text{disp}}$ .

<sup>b</sup>The values in parentheses give the percentage contribution to the total orbital interactions  $\Delta E_{\text{orb}}$ .

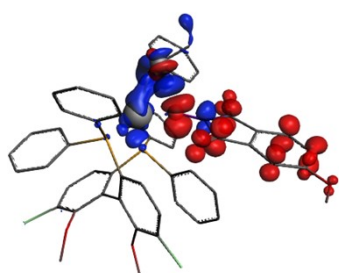

$$\Delta E_{\text{orb1}} = -30.1 \text{ kcal/mol}$$

$$v_1 = \pm 0.902$$

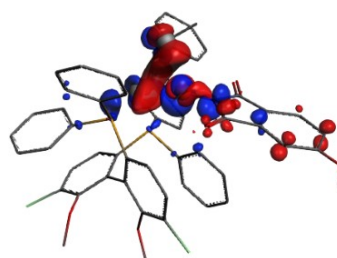

$$\Delta E_{\text{orb2}} = -6.2 \text{ kcal/mol}$$

$$v_2 = \pm 0.252$$

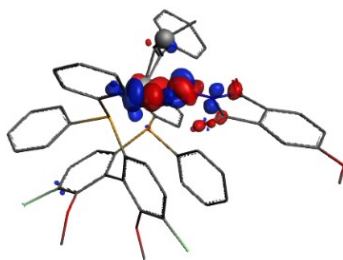

$$\Delta E_{\text{orb}3} = -3.6 \text{ kcal/mol}$$

$$v_3 = \pm 0.172$$

**Figure S7.** Plot of deformation densities  $\Delta\rho$  of the pairwise orbital interactions between the two fragments of **(S)-L1/Ni-1a<sup>+</sup> (S) + 2a<sup>-</sup>(S)** in **(S)-TS3A** together with the associated interaction energies  $\Delta E_{\text{orb}}$  (in kcal/mol). The eigenvalues  $v$  are a measure for the relative amount of charge transfer. The direction of the charge flow is from red to blue.

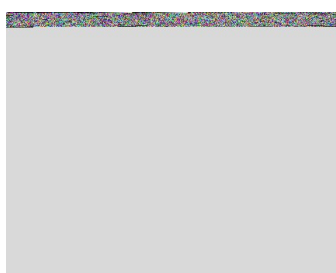

$$\Delta E_{\text{orb}1} = -30.1 \text{ kcal/mol}$$

$$v_1 = \pm 0.902$$

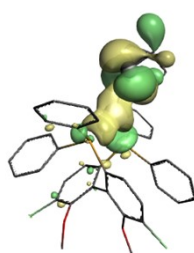

Frag1-LUMO

(0.407)

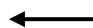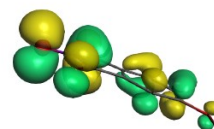

Frag2-HOMO

(-0.425)

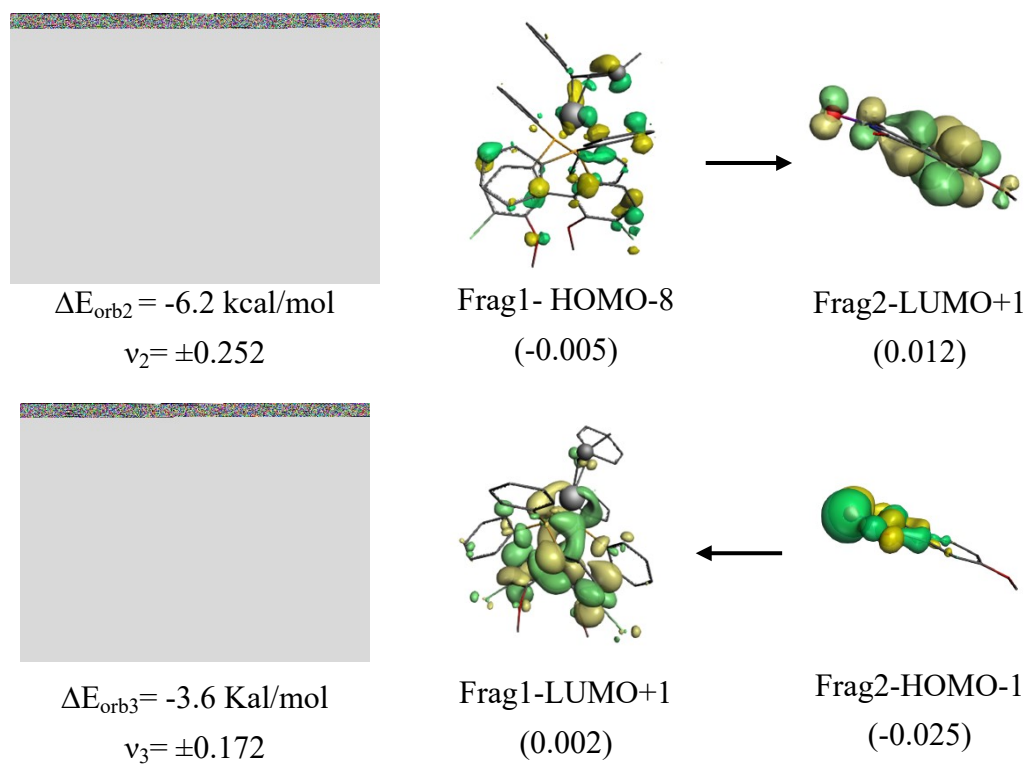

**Figure S8** Plot of deformation densities  $\Delta\rho$  of the pairwise orbital interactions and the associated interaction energies ( $\Delta E_{\text{orb}}$ ) between fragments, as well as the shape of the most important interacting MOs of the two fragments (S)-L1/Ni-1a<sup>+</sup> (S) +2a<sup>-</sup>(S) in (S)-TS3A, The direction of the charge flow is red to blue.



**Table S3.** EDA-NOCV results of **(R)-TS3B** at the BP86+(D3BJ)/TZ2P level of theory. Fragments are given in singlet (S) or triplet (T) electronic states. Energy values are given in kcal/mol.

| Fragment                                | (S)-L1/Ni-1a <sup>+</sup> (S) | (S)-L1/Ni-1a (D) |
|-----------------------------------------|-------------------------------|------------------|
|                                         | +2a <sup>+</sup> (S)          | +2a(D)           |
| $\Delta E_{\text{int}}$                 | -98.1                         | -47.1            |
| $\Delta E_{\text{Pauli}}$               | 84.6                          | 83.5             |
| $\Delta E_{\text{disp}}^{\text{[a]}}$   | -20.3 (11.1%)                 | -20.3 (15.5%)    |
| $\Delta E_{\text{elstat}}^{\text{[a]}}$ | -99.3 (54.4%)                 | -36.4 (27.9%)    |
| $\Delta E_{\text{orb}}^{\text{[a]}}$    | -63.1 (34.5%)                 | -73.9 (56.6%)    |
| $\Delta E_{\text{orb1}}^{\text{[b]}}$   | -31.4 (49.7%)                 |                  |
| $\Delta E_{\text{orb2}}^{\text{[b]}}$   | -6.2 (9.7%)                   |                  |
| $\Delta E_{\text{orb3}}^{\text{[b]}}$   | -4.2 (6.6%)                   |                  |
| $\Delta E_{\text{rest}}$                | -21.4 (33.9%)                 |                  |

<sup>a</sup>The values in parentheses give the percentage contribution to the total attractive interactions  $\Delta E_{\text{elstat}} + \Delta E_{\text{orb}} + \Delta E_{\text{disp}}$ .

<sup>b</sup>The values in parentheses give the percentage contribution to the total orbital interactions  $\Delta E_{\text{orb}}$ .

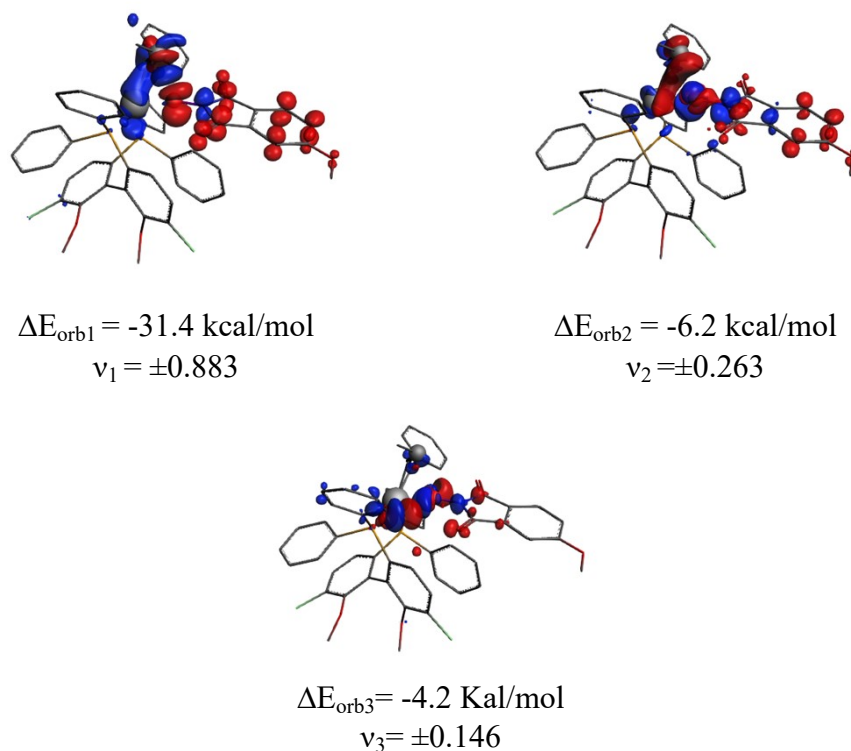

**Figure S9.** Plot of deformation densities  $\Delta\rho$  of the pairwise orbital interactions between the two fragments of **(S)-L1/Ni-1a<sup>+</sup> (S) + 2a<sup>+</sup>(S)** in **(R)-TS3B** together with the associated interaction energies  $\Delta E_{\text{orb}}$  (in kcal/mol). The eigenvalues  $v$  are a measure for the relative amount of charge

transfer. The direction of the charge flow is from red to blue.

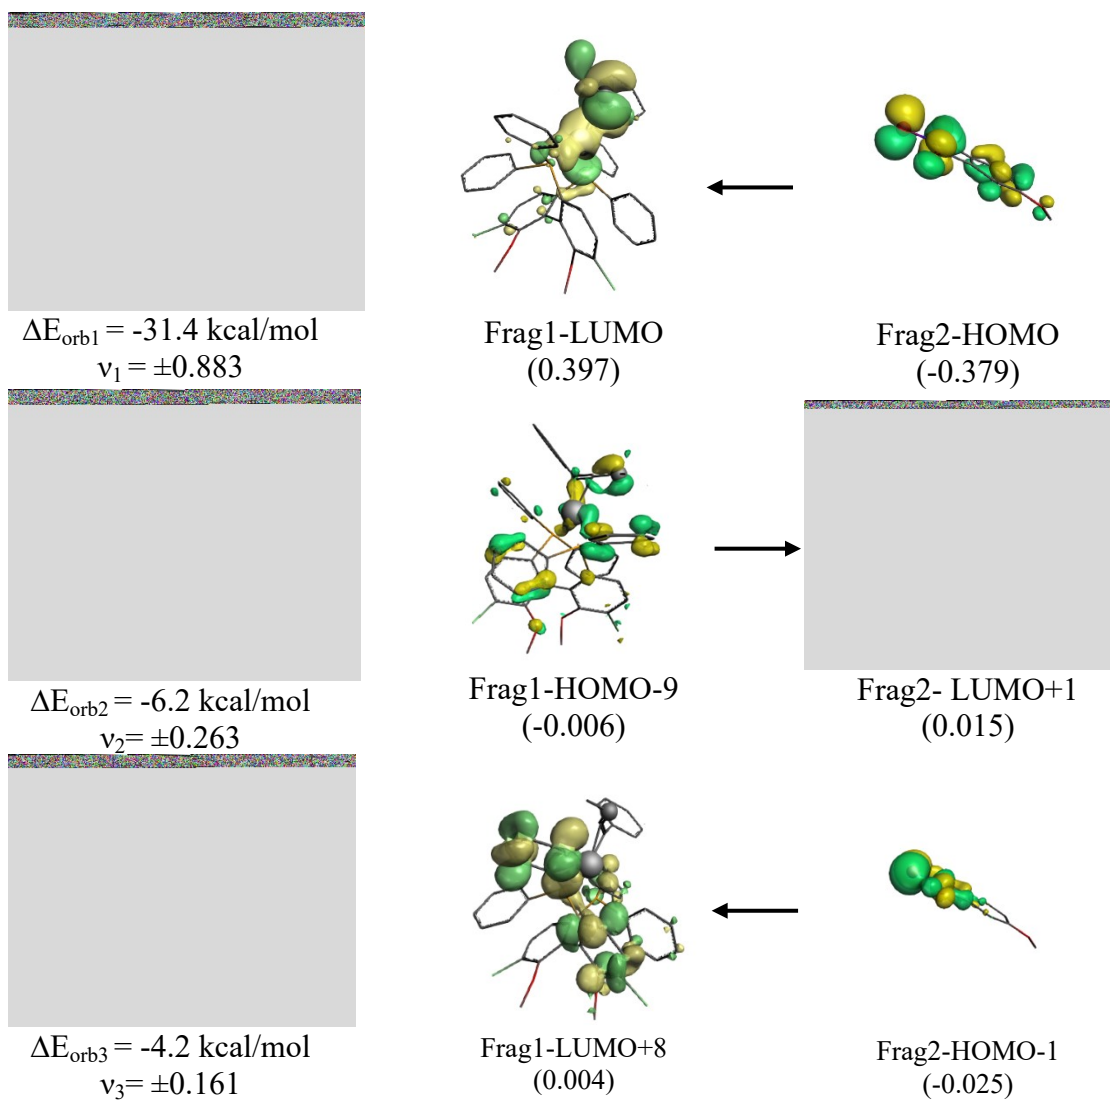

**Figure S10** Plot of deformation densities  $\Delta\rho$  of the pairwise orbital interactions and the associated interaction energies ( $\Delta E_{\text{orb}}$ ) between fragments, as well as the shape of the most important interacting MOs of the two fragments (S)-L1/Ni-1a<sup>+</sup> (S) +2a<sup>-</sup>(S) in (R)-TS3B, The direction of the charge flow is red to blue.

**Table S4.** Coordinates and energies (in hatree) of the calculated structures at the BP86+D3BJ/def2-TZVPP(IEFPCM,solvent=1,4-Dioxane)/BP86+D3BJ/def2-SVP(IEFPCM,solvent=1,4-Dioxane) level of theory.

|      |           |           |           |        |           |           |           |
|------|-----------|-----------|-----------|--------|-----------|-----------|-----------|
| Ni-L |           |           |           | H      | -2.680528 | 2.577954  | -0.841996 |
| Ni   | -0.085199 | -0.262795 | -2.407602 | C      | -1.332951 | 1.059797  | -0.041929 |
| P    | 1.708260  | -0.124278 | -1.402659 | C      | -2.184641 | -1.715898 | -0.290563 |
| P    | -1.821059 | -0.221902 | -1.297837 | C      | -2.935007 | -1.694389 | 0.903528  |
| C    | 3.295573  | -0.908871 | -1.940122 | H      | -3.330748 | -0.741998 | 1.287515  |
| C    | 3.147571  | -2.027958 | -2.792312 | C      | -3.117559 | -2.875860 | 1.638835  |
| H    | 2.126000  | -2.340056 | -3.073463 | H      | -3.685341 | -2.850815 | 2.581775  |
| C    | 4.269317  | -2.713351 | -3.282227 | C      | -2.544800 | -4.080506 | 1.194445  |
| H    | 4.136335  | -3.590329 | -3.935526 | H      | -2.674694 | -5.000872 | 1.784288  |
| C    | 5.562464  | -2.263546 | -2.955014 | C      | -1.779054 | -4.103172 | 0.015564  |
| H    | 6.446866  | -2.788231 | -3.349519 | H      | -1.305681 | -5.039535 | -0.319104 |
| C    | 5.720061  | -1.131371 | -2.136636 | C      | -1.600343 | -2.924132 | -0.723353 |
| H    | 6.730070  | -0.766534 | -1.890202 | H      | -0.969246 | -2.899310 | -1.627731 |
| C    | 4.595012  | -0.459595 | -1.626072 | C      | -3.469012 | 0.386836  | -1.880964 |
| H    | 4.733368  | 0.425333  | -0.987680 | C      | -3.424157 | 1.242091  | -3.005706 |
| C    | 2.175688  | 1.535982  | -0.762659 | H      | -2.438221 | 1.469727  | -3.448504 |
| C    | 1.570866  | 2.646124  | -1.387489 | C      | -4.601609 | 1.774153  | -3.553009 |
| H    | 0.862643  | 2.452922  | -2.210871 | H      | -4.549097 | 2.447808  | -4.423075 |
| C    | 1.827445  | 3.946521  | -0.928860 | C      | -5.848536 | 1.426886  | -3.000437 |
| H    | 1.334343  | 4.806807  | -1.407711 | H      | -6.777233 | 1.828934  | -3.435231 |
| C    | 2.699353  | 4.146129  | 0.156056  | C      | -5.905288 | 0.551716  | -1.901299 |
| H    | 2.896297  | 5.164748  | 0.523872  | H      | -6.880177 | 0.266675  | -1.474382 |
| C    | 3.299831  | 3.042888  | 0.788329  | C      | -4.723409 | 0.037669  | -1.339250 |
| H    | 3.968093  | 3.199028  | 1.650041  | H      | -4.781923 | -0.646444 | -0.479974 |
| C    | 3.031641  | 1.739409  | 0.340016  | O      | 1.116242  | 1.413630  | 2.647168  |
| H    | 3.456419  | 0.875044  | 0.872912  | C      | 1.470287  | 2.106604  | 3.839982  |
| C    | 1.286718  | -1.066504 | 0.143901  | H      | 2.030073  | 1.370839  | 4.450033  |
| C    | 1.822581  | -2.353900 | 0.362564  | H      | 0.576286  | 2.444992  | 4.402649  |
| H    | 2.575123  | -2.758250 | -0.329764 | H      | 2.120297  | 2.979626  | 3.631935  |
| C    | 1.400836  | -3.135667 | 1.443812  | O      | -0.991578 | -0.769755 | 3.018011  |
| H    | 1.793748  | -4.151837 | 1.594589  | C      | -0.690348 | -0.651355 | 4.411088  |
| C    | 0.456470  | -2.625742 | 2.346546  | H      | -1.136294 | 0.303957  | 4.754130  |
| C    | -0.063599 | -1.321029 | 2.183482  | H      | 0.405143  | -0.621442 | 4.584176  |
| C    | 0.326619  | -0.551435 | 1.057263  | H      | -1.124473 | -1.490072 | 4.993388  |
| C    | -0.310506 | 0.798651  | 0.906360  | Cl     | 0.203447  | 4.531733  | 2.535277  |
| C    | 0.149339  | 1.825840  | 1.783693  | Cl     | -0.117523 | -3.658230 | 3.644932  |
| C    | -0.379835 | 3.132225  | 1.635310  |        |           |           |           |
| C    | -1.393734 | 3.381518  | 0.694958  | (S)-1a |           |           |           |
| H    | -1.791784 | 4.403651  | 0.612994  | C      | -1.434292 | 0.571499  | -0.492584 |
| C    | -1.877639 | 2.359592  | -0.123543 | H      | -1.807698 | -0.027436 | -1.349823 |

|        |           |           |           |      |           |           |           |
|--------|-----------|-----------|-----------|------|-----------|-----------|-----------|
| C      | 0.000388  | 0.341065  | -0.329401 | H    | 1.461819  | 2.645457  | 0.166772  |
| C      | 1.212971  | 0.178070  | -0.223611 | H    | -5.432578 | 1.544081  | 1.141820  |
| C      | 2.624726  | -0.016259 | -0.097243 | O    | 2.093147  | 0.075461  | 0.724971  |
| C      | 3.238475  | -1.196178 | -0.594059 | C    | 3.368537  | -0.354914 | 0.688965  |
| H      | 2.613514  | -1.962238 | -1.077046 | O    | 3.951076  | -0.742890 | 1.679414  |
| C      | 4.622184  | -1.380524 | -0.467698 | O    | 3.898798  | -0.300667 | -0.560501 |
| C      | 5.415336  | -0.398173 | 0.153071  | C    | 5.254326  | -0.769135 | -0.667573 |
| H      | 6.501950  | -0.547208 | 0.251056  | H    | 5.534405  | -0.641448 | -1.728511 |
| C      | 4.816959  | 0.774449  | 0.649413  | H    | 5.925897  | -0.175417 | -0.015754 |
| H      | 5.434378  | 1.544914  | 1.137065  | H    | 5.324080  | -1.836237 | -0.376064 |
| C      | 3.434212  | 0.968657  | 0.527637  |      |           |           |           |
| H      | 2.960873  | 1.883128  | 0.915426  | 2a   |           |           |           |
| C      | -1.783413 | 2.049071  | -0.699704 | O    | -3.616251 | -0.848941 | 0.066984  |
| H      | -2.875828 | 2.160948  | -0.842204 | O    | -2.771012 | 1.872399  | -0.008749 |
| H      | -1.268036 | 2.436331  | -1.601052 | O    | -1.302432 | -2.460077 | -0.018247 |
| H      | -1.461580 | 2.644808  | 0.176885  | O    | 3.553860  | 0.184216  | 0.056442  |
| H      | 5.086953  | -2.300115 | -0.856256 | N    | -2.318701 | -0.404128 | -0.097649 |
| O      | -2.093241 | 0.072753  | 0.725316  | C    | -1.963562 | 0.963049  | -0.048715 |
| C      | -3.368666 | -0.357381 | 0.687581  | C    | -1.231623 | -1.244576 | -0.066885 |
| O      | -3.951286 | -0.749153 | 1.676485  | C    | -0.060130 | -0.371277 | -0.055326 |
| O      | -3.898859 | -0.298211 | -0.561693 | C    | 1.291975  | -0.681592 | -0.029045 |
| C      | -5.254374 | -0.766304 | -0.670696 | H    | 1.574054  | -1.568950 | -0.032430 |
| H      | -5.534668 | -0.633655 | -1.730969 | C    | 2.225030  | 0.362498  | 0.010636  |
| H      | -5.323939 | -1.834789 | -0.384239 | C    | 1.769192  | 1.665902  | 0.043048  |
| H      | -5.925863 | -0.175734 | -0.015948 | H    | 2.395517  | 2.352284  | 0.097108  |
|        |           |           |           | C    | 0.448274  | 1.995123  | 0.001749  |
| (R)-1a |           |           |           | H    | 0.184980  | 2.886826  | -0.009823 |
| C      | 1.434324  | 0.569650  | -0.494888 | C    | -0.498952 | 0.979984  | -0.021324 |
| H      | 1.807744  | -0.032567 | -1.349810 | C    | 4.069442  | -1.175649 | 0.000441  |
| C      | -0.000373 | 0.339927  | -0.330907 | H    | 3.506415  | -1.710013 | -0.565709 |
| C      | -1.212956 | 0.177346  | -0.224477 | H    | 4.077825  | -1.551502 | 0.885573  |
| C      | -2.624705 | -0.016479 | -0.097290 | H    | 4.961521  | -1.167519 | -0.351085 |
| C      | -3.433200 | 0.967843  | 0.529801  | H    | -3.680617 | -1.353780 | 0.880983  |
| H      | -2.959102 | 1.881479  | 0.918630  |      |           |           |           |
| C      | -4.815935 | 0.774094  | 0.652434  | IM1A |           |           |           |
| C      | -5.415290 | -0.397450 | 0.154730  | Ni   | 1.234817  | 0.273910  | -0.199937 |
| H      | -6.501894 | -0.546118 | 0.253384  | P    | 0.047865  | -1.513810 | -0.130936 |
| C      | -4.623128 | -1.379194 | -0.468256 | P    | -0.316176 | 1.747654  | -0.054822 |
| H      | -5.088661 | -2.297944 | -0.857887 | C    | 0.842287  | -2.991749 | -0.900292 |
| C      | -3.239432 | -1.195322 | -0.595453 | C    | 1.659361  | -2.761462 | -2.030549 |
| H      | -2.615239 | -1.960928 | -1.080149 | H    | 1.750913  | -1.737756 | -2.428257 |
| C      | 1.783645  | 2.046385  | -0.707543 | C    | 2.390776  | -3.808470 | -2.607723 |
| H      | 1.268398  | 2.430321  | -1.610385 | H    | 3.035035  | -3.610068 | -3.477983 |
| H      | 2.876090  | 2.157572  | -0.850365 | C    | 2.333940  | -5.097234 | -2.048168 |

|   |           |           |           |    |           |           |           |
|---|-----------|-----------|-----------|----|-----------|-----------|-----------|
| H | 2.929147  | -5.914851 | -2.483898 | C  | 1.265601  | 3.332154  | 1.596739  |
| C | 1.530142  | -5.333010 | -0.920636 | H  | 1.741175  | 2.370900  | 1.850936  |
| H | 1.490182  | -6.337815 | -0.471063 | C  | 1.742777  | 4.517715  | 2.177638  |
| C | 0.784788  | -4.287143 | -0.349040 | H  | 2.575069  | 4.465823  | 2.895834  |
| H | 0.177581  | -4.477932 | 0.548002  | C  | 1.184462  | 5.755049  | 1.809898  |
| C | -0.553876 | -2.104418 | 1.501584  | H  | 1.565382  | 6.687818  | 2.255059  |
| C | 0.039841  | -1.550520 | 2.654298  | C  | 0.150310  | 5.799660  | 0.858037  |
| H | 0.836666  | -0.797582 | 2.536175  | H  | -0.280353 | 6.767344  | 0.555263  |
| C | -0.405943 | -1.934834 | 3.929152  | C  | -0.334951 | 4.612920  | 0.281251  |
| H | 0.049922  | -1.487737 | 4.826151  | H  | -1.135681 | 4.660310  | -0.471523 |
| C | -1.443087 | -2.874382 | 4.057335  | O  | -4.159485 | -1.449694 | 1.279735  |
| H | -1.802410 | -3.164350 | 5.056625  | C  | -5.472091 | -1.698017 | 1.784240  |
| C | -2.036995 | -3.429362 | 2.909316  | H  | -6.030016 | -2.172144 | 0.952986  |
| H | -2.862325 | -4.151462 | 3.009505  | H  | -5.982114 | -0.757561 | 2.077800  |
| C | -1.597908 | -3.044523 | 1.633732  | H  | -5.454788 | -2.385780 | 2.652869  |
| H | -2.092754 | -3.443761 | 0.735329  | O  | -4.583814 | 0.704986  | -0.866606 |
| C | -1.507057 | -1.280179 | -1.110894 | C  | -5.976391 | 0.400958  | -0.982591 |
| C | -1.599690 | -1.778853 | -2.426255 | H  | -6.447650 | 0.725161  | -0.033481 |
| H | -0.814403 | -2.440097 | -2.820140 | H  | -6.142462 | -0.687690 | -1.118266 |
| C | -2.671264 | -1.418351 | -3.250147 | H  | -6.443392 | 0.944409  | -1.828550 |
| H | -2.727330 | -1.770489 | -4.290502 | Cl | -4.197196 | -0.741025 | 4.388886  |
| C | -3.681624 | -0.576633 | -2.760884 | Cl | -4.932995 | -0.047788 | -3.872262 |
| C | -3.651754 | -0.115543 | -1.423562 | C  | 2.920826  | 1.084406  | -0.433618 |
| C | -2.536327 | -0.443827 | -0.607438 | C  | 3.077959  | -0.205512 | -0.288297 |
| C | -2.499305 | 0.129902  | 0.776984  | C  | 3.946238  | -1.360885 | -0.321213 |
| C | -3.378974 | -0.437293 | 1.742903  | C  | 3.694542  | -2.483813 | 0.506067  |
| C | -3.305478 | 0.023155  | 3.080232  | H  | 2.846532  | -2.439831 | 1.205749  |
| C | -2.447497 | 1.080343  | 3.423454  | C  | 4.492095  | -3.631133 | 0.418945  |
| H | -2.422009 | 1.421714  | 4.468571  | C  | 5.556971  | -3.686800 | -0.499899 |
| C | -1.621898 | 1.665421  | 2.459718  | H  | 6.175182  | -4.595002 | -0.576982 |
| H | -0.952145 | 2.487728  | 2.748766  | C  | 5.823620  | -2.577823 | -1.324159 |
| C | -1.621488 | 1.183400  | 1.134850  | H  | 6.654447  | -2.615693 | -2.047175 |
| C | -1.268158 | 2.168839  | -1.570202 | C  | 5.030913  | -1.423738 | -1.234718 |
| C | -2.516940 | 2.824625  | -1.532675 | H  | 5.220025  | -0.559533 | -1.890119 |
| H | -2.963686 | 3.099619  | -0.565131 | C  | 3.651354  | 2.890596  | -2.000422 |
| C | -3.217800 | 3.068725  | -2.723298 | H  | 4.223655  | 3.837197  | -2.071407 |
| H | -4.201829 | 3.561074  | -2.687244 | H  | 2.603506  | 3.080626  | -2.304953 |
| C | -2.681622 | 2.654418  | -3.955448 | H  | 4.087605  | 2.146499  | -2.696886 |
| H | -3.243283 | 2.829438  | -4.885897 | H  | 4.273336  | -4.497131 | 1.062905  |
| C | -1.441294 | 1.994555  | -3.996691 | O  | 5.062552  | 2.156972  | -0.184698 |
| H | -1.028784 | 1.652623  | -4.958786 | C  | 5.270631  | 2.033752  | 1.146070  |
| C | -0.735555 | 1.752113  | -2.807552 | O  | 4.465264  | 2.270810  | 2.025704  |
| H | 0.224940  | 1.210519  | -2.817333 | O  | 6.523793  | 1.622031  | 1.424617  |
| C | 0.214293  | 3.368550  | 0.652644  | C  | 7.388699  | 1.210765  | 0.351502  |

|      |           |           |           |    |           |           |           |
|------|-----------|-----------|-----------|----|-----------|-----------|-----------|
| H    | 8.339346  | 0.915351  | 0.832517  | H  | -2.100902 | -2.179157 | -4.283931 |
| H    | 6.956548  | 0.345341  | -0.190897 | C  | -1.125115 | -1.995517 | -2.344823 |
| H    | 7.568055  | 2.039190  | -0.362769 | H  | -0.249921 | -2.585681 | -2.651627 |
| C    | 3.656492  | 2.361257  | -0.570171 | C  | -1.183624 | -1.438372 | -1.051135 |
| H    | 3.236014  | 3.120797  | 0.119884  | C  | -0.387329 | -2.107550 | 1.645981  |
|      |           |           |           | C  | -1.347411 | -3.140093 | 1.703819  |
| IM1B |           |           |           | H  | -1.715051 | -3.599404 | 0.773624  |
| Ni   | 1.303854  | 0.417162  | 0.077508  | C  | -1.873340 | -3.540874 | 2.941510  |
| P    | -0.386650 | 1.741245  | -0.051587 | H  | -2.633144 | -4.337047 | 2.981297  |
| P    | 0.298961  | -1.474004 | 0.061598  | C  | -1.453365 | -2.908143 | 4.125027  |
| C    | -0.087387 | 3.455013  | 0.565535  | H  | -1.883309 | -3.210245 | 5.092307  |
| C    | 0.774513  | 3.591583  | 1.678131  | C  | -0.501282 | -1.875412 | 4.070847  |
| H    | 1.192056  | 2.687128  | 2.149241  | H  | -0.184463 | -1.367243 | 4.994973  |
| C    | 1.138514  | 4.860592  | 2.148010  | C  | 0.032314  | -1.476768 | 2.835297  |
| H    | 1.821268  | 4.949934  | 3.006761  | H  | 0.761094  | -0.651817 | 2.770932  |
| C    | 0.667571  | 6.013401  | 1.494731  | C  | 1.289884  | -2.870530 | -0.631693 |
| H    | 0.973633  | 7.010997  | 1.846549  | C  | 2.169118  | -2.555524 | -1.693135 |
| C    | -0.177422 | 5.886804  | 0.380030  | H  | 2.267643  | -1.506704 | -2.017492 |
| H    | -0.539360 | 6.785761  | -0.143707 | C  | 2.923964  | -3.561484 | -2.316024 |
| C    | -0.556793 | 4.614526  | -0.082691 | H  | 3.608762  | -3.301347 | -3.136734 |
| H    | -1.203203 | 4.527111  | -0.968308 | C  | 2.831120  | -4.890096 | -1.863349 |
| C    | -1.231340 | 1.970999  | -1.666733 | H  | 3.422200  | -5.681232 | -2.351136 |
| C    | -0.556819 | 1.522786  | -2.820656 | C  | 1.991779  | -5.203294 | -0.780523 |
| H    | 0.440067  | 1.064652  | -2.709841 | H  | 1.931739  | -6.238637 | -0.409196 |
| C    | -1.168477 | 1.629589  | -4.079990 | C  | 1.220427  | -4.199919 | -0.168264 |
| H    | -0.644280 | 1.264142  | -4.976739 | H  | 0.564192  | -4.455024 | 0.677038  |
| C    | -2.454900 | 2.184465  | -4.190805 | O  | -4.442641 | 0.247862  | -1.134900 |
| H    | -2.941445 | 2.253063  | -5.175897 | C  | -5.786838 | -0.204284 | -1.319462 |
| C    | -3.131198 | 2.631709  | -3.041405 | H  | -5.833797 | -1.310089 | -1.397567 |
| H    | -4.148496 | 3.044164  | -3.125389 | H  | -6.245582 | 0.240297  | -2.225604 |
| C    | -2.524148 | 2.524451  | -1.781392 | H  | -6.352985 | 0.121345  | -0.424137 |
| H    | -3.070313 | 2.832949  | -0.876890 | O  | -3.987609 | -1.779649 | 1.127778  |
| C    | -1.727350 | 1.096951  | 1.058559  | C  | -5.290461 | -2.170710 | 1.560471  |
| C    | -1.896773 | 1.635315  | 2.350554  | H  | -5.728329 | -2.740271 | 0.717322  |
| H    | -1.353302 | 2.543803  | 2.646374  | H  | -5.930271 | -1.291427 | 1.779783  |
| C    | -2.734712 | 1.004997  | 3.274306  | H  | -5.247595 | -2.819637 | 2.457677  |
| H    | -2.838472 | 1.394617  | 4.297558  | Cl | -4.492791 | -0.673461 | -4.109623 |
| C    | -3.442296 | -0.155337 | 2.920930  | Cl | -4.356141 | -0.951657 | 4.195699  |
| C    | -3.353885 | -0.676646 | 1.607129  | C  | 4.121211  | -0.960750 | 0.654513  |
| C    | -2.456615 | -0.060137 | 0.687732  | H  | 3.594864  | -1.913496 | 0.858109  |
| C    | -2.325427 | -0.689469 | -0.666376 | C  | 3.139019  | 0.122371  | 0.383830  |
| C    | -3.398752 | -0.504948 | -1.577865 | C  | 2.953880  | 1.392231  | 0.145316  |
| C    | -3.282644 | -1.025240 | -2.888363 | C  | 3.393316  | 2.768731  | 0.090489  |
| C    | -2.160676 | -1.780493 | -3.260747 | C  | 2.806407  | 3.670819  | -0.833057 |

|      |           |           |           |   |           |           |           |
|------|-----------|-----------|-----------|---|-----------|-----------|-----------|
| H    | 2.048361  | 3.284439  | -1.530988 | C | 1.341889  | 3.943559  | 2.705053  |
| C    | 3.162449  | 5.024268  | -0.839276 | H | 2.279910  | 4.515193  | 2.783963  |
| C    | 4.103471  | 5.512810  | 0.086318  | C | 1.383399  | 2.591316  | 2.335290  |
| H    | 4.371159  | 6.581097  | 0.092349  | H | 2.348798  | 2.107525  | 2.120751  |
| C    | 4.695977  | 4.630444  | 1.008099  | C | -1.373205 | -0.526931 | 1.435300  |
| H    | 5.432911  | 5.006733  | 1.735742  | C | -1.788786 | -1.702403 | 2.098904  |
| C    | 4.351778  | 3.270666  | 1.008061  | H | -1.155312 | -2.153365 | 2.874323  |
| H    | 4.803361  | 2.580631  | 1.737192  | C | -2.998448 | -2.313478 | 1.767736  |
| C    | 5.065283  | -0.615006 | 1.806206  | H | -3.317786 | -3.235883 | 2.274558  |
| H    | 5.754821  | -1.457139 | 2.013239  | C | -3.837304 | -1.773754 | 0.778390  |
| H    | 4.475098  | -0.407655 | 2.721318  | C | -3.455766 | -0.596314 | 0.088206  |
| H    | 5.653968  | 0.289718  | 1.554308  | C | -2.195804 | 0.001347  | 0.405182  |
| H    | 2.687974  | 5.709838  | -1.558420 | C | -1.783231 | 1.177490  | -0.430430 |
| O    | 4.901399  | -1.154062 | -0.585045 | C | -2.444831 | 2.413585  | -0.215333 |
| C    | 5.472823  | -2.337756 | -0.853322 | C | -2.035217 | 3.553980  | -0.942724 |
| O    | 6.092600  | -2.548495 | -1.878035 | C | -1.082443 | 3.443113  | -1.967539 |
| O    | 5.286002  | -3.246016 | 0.139808  | H | -0.800644 | 4.337830  | -2.541827 |
| C    | 5.879764  | -4.531056 | -0.091336 | C | -0.496636 | 2.201551  | -2.239165 |
| H    | 5.603059  | -5.152257 | 0.779401  | H | 0.230314  | 2.123146  | -3.059372 |
| H    | 5.485564  | -4.981676 | -1.022864 | C | -0.803726 | 1.065638  | -1.459709 |
| H    | 6.982434  | -4.445197 | -0.171194 | C | -1.236713 | -1.725325 | -1.924122 |
|      |           |           |           | C | -2.271559 | -1.474936 | -2.851132 |
|      |           |           |           | H | -2.281753 | -0.527002 | -3.411340 |
| IM1C |           |           |           | C | -3.284030 | -2.426009 | -3.050544 |
| Ni   | 1.560967  | -0.682307 | 0.054586  | H | -4.084190 | -2.230532 | -3.782279 |
| P    | 0.351981  | 0.094041  | 1.677301  | C | -3.280430 | -3.625923 | -2.314571 |
| P    | 0.128882  | -0.520770 | -1.623571 | H | -4.085224 | -4.363228 | -2.459518 |
| C    | 0.877322  | -0.635361 | 3.300322  | C | -2.254142 | -3.876700 | -1.388719 |
| C    | 2.166832  | -1.201337 | 3.363724  | H | -2.258230 | -4.808604 | -0.801670 |
| H    | 2.786729  | -1.192032 | 2.452048  | C | -1.231857 | -2.932427 | -1.195764 |
| C    | 2.654863  | -1.735142 | 4.569035  | H | -0.432006 | -3.109337 | -0.461324 |
| H    | 3.663538  | -2.175899 | 4.603882  | C | 0.979298  | -0.464747 | -3.248476 |
| C    | 1.852217  | -1.706803 | 5.722274  | C | 2.043162  | 0.457391  | -3.433948 |
| H    | 2.227701  | -2.129343 | 6.667671  | H | 2.234587  | 1.237197  | -2.684561 |
| C    | 0.571795  | -1.121995 | 5.672343  | C | 2.877711  | 0.374334  | -4.558584 |
| H    | -0.050812 | -1.081123 | 6.580279  | H | 3.692279  | 1.106244  | -4.679751 |
| C    | 0.089406  | -0.579745 | 4.470351  | C | 2.689259  | -0.642225 | -5.513007 |
| H    | -0.904738 | -0.106243 | 4.439067  | H | 3.351893  | -0.713127 | -6.389836 |
| C    | 0.188150  | 1.849065  | 2.214632  | C | 1.645246  | -1.569220 | -5.333642 |
| C    | -1.042286 | 2.468487  | 2.502037  | H | 1.484956  | -2.369633 | -6.073912 |
| H    | -1.979054 | 1.899480  | 2.429978  | C | 0.798486  | -1.482260 | -4.217429 |
| C    | -1.084323 | 3.830201  | 2.846101  | H | -0.007114 | -2.220499 | -4.089380 |
| H    | -2.057792 | 4.311921  | 3.026283  | O | -3.420595 | 2.449106  | 0.741549  |
| C    | 0.105240  | 4.571961  | 2.944533  | C | -4.730579 | 2.883518  | 0.359219  |
| H    | 0.070697  | 5.640876  | 3.208240  |   |           |           |           |

|      |           |           |           |   |           |           |           |
|------|-----------|-----------|-----------|---|-----------|-----------|-----------|
| H    | -4.857518 | 3.975617  | 0.507713  | H | 3.073577  | -1.508328 | 1.343243  |
| H    | -5.444618 | 2.336695  | 1.006113  | C | 3.666030  | -3.603610 | 1.324820  |
| H    | -4.937356 | 2.633034  | -0.701328 | H | 4.688626  | -3.397004 | 1.675984  |
| O    | -4.115782 | 0.049075  | -0.907051 | C | 3.270312  | -4.921430 | 1.032721  |
| C    | -5.441888 | -0.245328 | -1.335373 | H | 3.981624  | -5.753407 | 1.154266  |
| H    | -5.691231 | 0.552425  | -2.061630 | C | 1.960657  | -5.175850 | 0.590740  |
| H    | -6.164024 | -0.216291 | -0.494657 | H | 1.640720  | -6.207774 | 0.374392  |
| H    | -5.500479 | -1.229991 | -1.839039 | C | 1.048976  | -4.117519 | 0.423958  |
| Cl   | -2.658079 | 5.139159  | -0.520494 | H | 0.023236  | -4.330753 | 0.085817  |
| Cl   | -5.309166 | -2.686470 | 0.445267  | C | -0.310152 | -1.180171 | 2.183530  |
| C    | 4.012505  | -2.170313 | -0.707130 | C | -0.070659 | -0.023116 | 2.949894  |
| H    | 5.121709  | -2.122508 | -0.694678 | H | 0.527785  | 0.797288  | 2.520238  |
| C    | 3.401672  | -0.870931 | -0.407471 | C | -0.607271 | 0.079082  | 4.244121  |
| C    | 3.172665  | 0.391670  | -0.376333 | H | -0.431653 | 0.993856  | 4.831690  |
| C    | 3.492761  | 1.780710  | -0.546699 | C | -1.364300 | -0.975711 | 4.781327  |
| C    | 2.447545  | 2.741529  | -0.588739 | H | -1.786898 | -0.888726 | 5.794377  |
| H    | 1.415294  | 2.394237  | -0.449028 | C | -1.574298 | -2.145701 | 4.026922  |
| C    | 2.726997  | 4.097112  | -0.799022 | H | -2.144251 | -2.983354 | 4.459844  |
| C    | 4.056025  | 4.527559  | -0.969077 | C | -1.050183 | -2.249710 | 2.729729  |
| H    | 4.278243  | 5.593806  | -1.132482 | H | -1.223454 | -3.159769 | 2.134805  |
| C    | 5.104833  | 3.585193  | -0.928186 | C | -0.999357 | -1.695131 | -0.614631 |
| H    | 6.147061  | 3.917650  | -1.059993 | C | -0.790940 | -2.532693 | -1.733511 |
| C    | 4.832341  | 2.227003  | -0.719852 | H | 0.154670  | -3.083297 | -1.840482 |
| H    | 5.650134  | 1.490432  | -0.688775 | C | -1.755704 | -2.643616 | -2.738017 |
| C    | 3.513470  | -2.761076 | -2.026766 | H | -1.581799 | -3.267994 | -3.626361 |
| H    | 3.972458  | -3.753097 | -2.209157 | C | -2.954946 | -1.924271 | -2.629232 |
| H    | 3.776766  | -2.076869 | -2.857803 | C | -3.203630 | -1.090740 | -1.514741 |
| H    | 2.410304  | -2.848855 | -2.010018 | C | -2.200615 | -0.941562 | -0.519140 |
| H    | 1.897624  | 4.821460  | -0.822876 | C | -2.460514 | 0.067726  | 0.564729  |
| O    | 3.770354  | -3.144258 | 0.402993  | C | -3.371523 | -0.316009 | 1.596008  |
| C    | 2.538967  | -3.327166 | 0.865930  | C | -3.659325 | 0.613644  | 2.625685  |
| O    | 1.513668  | -2.696192 | 0.577605  | C | -3.091813 | 1.898871  | 2.596179  |
| O    | 2.543739  | -4.328503 | 1.752693  | H | -3.348301 | 2.600705  | 3.403002  |
| C    | 1.289228  | -4.565129 | 2.425174  | C | -2.208046 | 2.270687  | 1.583361  |
| H    | 1.479782  | -5.405987 | 3.114697  | H | -1.764815 | 3.276127  | 1.595776  |
| H    | 0.982248  | -3.663083 | 2.990573  | C | -1.864234 | 1.355615  | 0.567529  |
| H    | 0.498444  | -4.832243 | 1.696787  | C | -1.121530 | 1.385772  | -2.226874 |
|      |           |           |           | C | -2.444567 | 1.732232  | -2.573830 |
| IM1D |           |           |           | H | -3.102286 | 2.199721  | -1.825306 |
| Ni   | 1.317320  | 0.498299  | -0.289945 | C | -2.936916 | 1.433997  | -3.852766 |
| P    | 0.408942  | -1.283675 | 0.486286  | H | -3.977979 | 1.683083  | -4.109289 |
| P    | -0.437016 | 1.730708  | -0.549661 | C | -2.114215 | 0.785601  | -4.791390 |
| C    | 1.452808  | -2.791774 | 0.678746  | H | -2.508930 | 0.536882  | -5.788753 |
| C    | 2.764729  | -2.546636 | 1.143455  | C | -0.796107 | 0.439197  | -4.449652 |



|    |           |           |           |      |           |           |           |
|----|-----------|-----------|-----------|------|-----------|-----------|-----------|
| H  | -0.152678 | -0.075903 | -5.180287 | C    | 3.643903  | 2.074526  | 1.934368  |
| C  | -0.298435 | 0.738706  | -3.170960 | O    | 2.498520  | 2.402567  | 2.189261  |
| H  | 0.730282  | 0.463963  | -2.884410 | O    | 4.361815  | 1.326114  | 2.794276  |
| C  | -0.301296 | 3.573614  | -0.519478 | C    | 5.637606  | 0.801570  | 2.388752  |
| C  | 0.405686  | 4.148406  | 0.562580  | H    | 6.016617  | 0.232793  | 3.257486  |
| H  | 0.844324  | 3.497764  | 1.335282  | H    | 5.527284  | 0.126251  | 1.516711  |
| C  | 0.601047  | 5.538065  | 0.623704  | H    | 6.347792  | 1.616608  | 2.132240  |
| H  | 1.151445  | 5.970418  | 1.474607  | C    | 3.562148  | 2.717027  | -0.386973 |
| C  | 0.121272  | 6.367356  | -0.406428 | H    | 2.824860  | 3.496662  | -0.108689 |
| H  | 0.283946  | 7.455874  | -0.362601 |      |           |           |           |
| C  | -0.556786 | 5.797501  | -1.498019 | TS1A |           |           |           |
| H  | -0.928234 | 6.438613  | -2.313608 | Ni   | 1.368958  | 0.563065  | -0.282674 |
| C  | -0.771036 | 4.409193  | -1.555063 | P    | 0.409432  | -1.375873 | -0.043663 |
| H  | -1.303083 | 3.975757  | -2.414847 | P    | -0.414884 | 1.833140  | -0.357481 |
| O  | -3.831195 | -1.586399 | 1.446739  | C    | 1.384653  | -2.784286 | -0.728262 |
| C  | -4.739421 | -2.241889 | 2.327618  | C    | 1.993622  | -2.598429 | -1.990932 |
| H  | -5.004654 | -3.189488 | 1.809353  | H    | 1.843439  | -1.647984 | -2.527460 |
| H  | -5.657218 | -1.640511 | 2.494453  | C    | 2.816376  | -3.590535 | -2.540863 |
| H  | -4.265062 | -2.471060 | 3.306004  | H    | 3.290520  | -3.426220 | -3.520588 |
| O  | -4.328227 | -0.320635 | -1.408589 | C    | 3.066280  | -4.773581 | -1.822575 |
| C  | -5.587706 | -0.981734 | -1.235603 | H    | 3.731704  | -5.543967 | -2.242365 |
| H  | -6.330076 | -0.195867 | -1.091014 | C    | 2.479030  | -4.959350 | -0.560492 |
| H  | -5.569342 | -1.618370 | -0.321309 | H    | 2.680771  | -5.877980 | 0.012856  |
| H  | -5.847818 | -1.633330 | -2.129068 | C    | 1.638803  | -3.972486 | -0.015267 |
| Cl | -4.691799 | 0.267331  | 4.012508  | H    | 1.195104  | -4.121065 | 0.980170  |
| Cl | -4.101127 | -1.996402 | -3.953869 | C    | -0.099597 | -1.924842 | 1.634438  |
| C  | 2.891173  | 1.440292  | -0.749835 | C    | 0.338964  | -1.179975 | 2.748621  |
| C  | 3.090614  | 0.173890  | -0.985957 | H    | 0.977646  | -0.290493 | 2.602848  |
| C  | 3.898882  | -0.961869 | -1.368997 | C    | -0.084291 | -1.550795 | 4.036266  |
| C  | 3.282258  | -2.108503 | -1.932245 | H    | 0.239247  | -0.954756 | 4.903870  |
| H  | 2.195496  | -2.079922 | -2.098987 | C    | -0.928152 | -2.659362 | 4.217807  |
| C  | 4.030595  | -3.248794 | -2.246062 | H    | -1.263998 | -2.938059 | 5.228733  |
| C  | 5.415714  | -3.272808 | -1.997782 | C    | -1.357873 | -3.405501 | 3.104874  |
| H  | 6.005758  | -4.173722 | -2.227888 | H    | -2.024208 | -4.271736 | 3.243192  |
| C  | 6.046928  | -2.137562 | -1.455548 | C    | -0.954136 | -3.035106 | 1.813413  |
| H  | 7.132331  | -2.148289 | -1.265438 | H    | -1.323184 | -3.591779 | 0.938093  |
| C  | 5.300875  | -0.988090 | -1.153220 | C    | -1.187410 | -1.478164 | -0.980122 |
| H  | 5.791592  | -0.097164 | -0.731005 | C    | -1.282544 | -2.190253 | -2.192346 |
| C  | 4.556110  | 3.234879  | -1.411616 | H    | -0.435750 | -2.796338 | -2.543314 |
| H  | 5.143832  | 4.080660  | -0.992252 | C    | -2.440696 | -2.120193 | -2.974900 |
| H  | 4.006827  | 3.588040  | -2.308367 | H    | -2.503201 | -2.643277 | -3.940202 |
| H  | 5.248743  | 2.422867  | -1.719018 | C    | -3.530135 | -1.352273 | -2.540127 |
| H  | 3.530897  | -4.133184 | -2.670610 | C    | -3.488621 | -0.679586 | -1.297509 |
| O  | 4.351009  | 2.397595  | 0.828913  | C    | -2.299037 | -0.723915 | -0.525427 |

|    |           |           |           |      |           |           |           |
|----|-----------|-----------|-----------|------|-----------|-----------|-----------|
| C  | -2.294648 | 0.033509  | 0.769097  | C    | 4.185619  | -0.679753 | -0.848279 |
| C  | -3.047244 | -0.536048 | 1.841162  | C    | 4.262090  | -1.735369 | 0.096639  |
| C  | -3.016861 | 0.107835  | 3.102300  | H    | 3.553110  | -1.736775 | 0.936570  |
| C  | -2.328451 | 1.322479  | 3.260000  | C    | 5.231941  | -2.733868 | -0.035439 |
| H  | -2.331735 | 1.801306  | 4.249919  | C    | 6.122219  | -2.718121 | -1.126588 |
| C  | -1.633848 | 1.898482  | 2.195345  | H    | 6.870095  | -3.518391 | -1.240498 |
| H  | -1.098293 | 2.844294  | 2.350414  | C    | 6.053834  | -1.677983 | -2.071508 |
| C  | -1.593847 | 1.252553  | 0.943778  | H    | 6.751020  | -1.660965 | -2.924245 |
| C  | -1.376592 | 1.747754  | -1.919193 | C    | 5.104673  | -0.655426 | -1.928525 |
| C  | -2.695438 | 2.242276  | -2.010096 | H    | 5.041960  | 0.161317  | -2.664090 |
| H  | -3.183715 | 2.666329  | -1.119563 | C    | 4.859414  | 3.214342  | -0.740300 |
| C  | -3.396591 | 2.151177  | -3.220954 | H    | 5.241520  | 3.998634  | -0.058300 |
| H  | -4.433128 | 2.516484  | -3.281382 | H    | 4.917497  | 3.611352  | -1.779126 |
| C  | -2.787762 | 1.565469  | -4.345768 | H    | 5.508030  | 2.318714  | -0.680196 |
| H  | -3.346804 | 1.478649  | -5.290162 | H    | 5.282844  | -3.544705 | 0.707299  |
| C  | -1.475158 | 1.071595  | -4.258117 | O    | 3.637682  | 2.765980  | 1.580641  |
| H  | -1.002259 | 0.600022  | -5.133683 | C    | 3.054040  | 1.729402  | 2.066402  |
| C  | -0.768874 | 1.164222  | -3.047804 | O    | 1.824231  | 1.521123  | 2.157834  |
| H  | 0.254105  | 0.764198  | -2.952655 | O    | 3.857995  | 0.698613  | 2.508515  |
| C  | -0.210117 | 3.649198  | -0.088482 | C    | 5.268502  | 0.832025  | 2.315383  |
| C  | 0.571552  | 4.075327  | 1.011394  | H    | 5.728255  | -0.048512 | 2.803254  |
| H  | 1.019497  | 3.316634  | 1.675099  | H    | 5.530499  | 0.823725  | 1.236859  |
| C  | 0.816504  | 5.442584  | 1.216612  | H    | 5.656727  | 1.765550  | 2.771052  |
| H  | 1.431433  | 5.755642  | 2.075041  | C    | 3.431207  | 2.882696  | -0.428590 |
| C  | 0.306779  | 6.399622  | 0.321211  | H    | 2.736955  | 3.735503  | -0.345162 |
| H  | 0.507136  | 7.471230  | 0.479437  |      |           |           |           |
| C  | -0.447427 | 5.978657  | -0.787432 | TS1B |           |           |           |
| H  | -0.838285 | 6.718354  | -1.504188 | Ni   | 1.470631  | -0.053669 | -0.822803 |
| C  | -0.705617 | 4.612427  | -0.994384 | P    | 0.511675  | -1.449122 | 0.528065  |
| H  | -1.288270 | 4.299855  | -1.872624 | P    | -0.317074 | 1.016964  | -1.534957 |
| O  | -3.674477 | -1.693391 | 1.504992  | C    | 1.344843  | -3.082004 | 0.683658  |
| C  | -4.714883 | -2.297181 | 2.268302  | C    | 1.811891  | -3.670486 | -0.515036 |
| H  | -5.175126 | -3.043175 | 1.591516  | H    | 1.669148  | -3.136477 | -1.465036 |
| H  | -5.482101 | -1.558691 | 2.577820  | C    | 2.485643  | -4.899890 | -0.484840 |
| H  | -4.319416 | -2.812041 | 3.166113  | H    | 2.854865  | -5.342659 | -1.424396 |
| O  | -4.503209 | 0.092233  | -0.819632 | C    | 2.716884  | -5.544065 | 0.742606  |
| C  | -5.804687 | -0.481514 | -0.656014 | H    | 3.260480  | -6.499497 | 0.765734  |
| H  | -6.229990 | -0.045987 | 0.270284  | C    | 2.273279  | -4.954632 | 1.939167  |
| H  | -5.746023 | -1.583537 | -0.544333 | H    | 2.470293  | -5.448030 | 2.904114  |
| H  | -6.464286 | -0.238979 | -1.514127 | C    | 1.586487  | -3.727576 | 1.910499  |
| Cl | -3.752996 | -0.559066 | 4.557310  | H    | 1.262540  | -3.265876 | 2.854122  |
| Cl | -4.916707 | -1.173900 | -3.598429 | C    | 0.361145  | -0.756533 | 2.220700  |
| C  | 2.881471  | 1.624933  | -0.733242 | C    | 0.966695  | 0.490863  | 2.482498  |
| C  | 3.166096  | 0.329787  | -0.711825 | H    | 1.525437  | 1.027051  | 1.692512  |

|   |           |           |           |      |           |           |           |
|---|-----------|-----------|-----------|------|-----------|-----------|-----------|
| C | 0.798738  | 1.099433  | 3.733191  | C    | -0.722380 | 2.731498  | -3.795081 |
| H | 1.232703  | 2.101816  | 3.885528  | H    | -1.355892 | 1.938042  | -4.223907 |
| C | 0.045443  | 0.459811  | 4.733642  | O    | -3.215821 | -0.288020 | 2.531970  |
| H | -0.090584 | 0.941468  | 5.716401  | C    | -4.175033 | -0.159686 | 3.577962  |
| C | -0.551894 | -0.787124 | 4.473689  | H    | -4.756857 | -1.097319 | 3.555367  |
| H | -1.154215 | -1.282561 | 5.253768  | H    | -4.862241 | 0.700650  | 3.407156  |
| C | -0.413686 | -1.388559 | 3.217147  | H    | -3.699701 | -0.053919 | 4.571033  |
| H | -0.936800 | -2.333075 | 2.995679  | O    | -4.455647 | -0.197309 | -0.277400 |
| C | -1.229434 | -1.906421 | 0.117884  | C    | -5.715515 | -0.394940 | 0.372595  |
| C | -1.541228 | -3.195494 | -0.362270 | H    | -5.937881 | 0.535570  | 0.931501  |
| H | -0.772433 | -3.980330 | -0.380186 | H    | -5.677284 | -1.245190 | 1.088987  |
| C | -2.821697 | -3.487128 | -0.839859 | H    | -6.523460 | -0.577473 | -0.360518 |
| H | -3.059492 | -4.479617 | -1.252207 | Cl   | -2.761649 | 2.454393  | 4.202940  |
| C | -3.809912 | -2.492991 | -0.831811 | Cl   | -5.359892 | -2.829833 | -1.578705 |
| C | -3.544148 | -1.210482 | -0.295863 | C    | 3.601769  | 2.156823  | -1.121867 |
| C | -2.236333 | -0.909851 | 0.161309  | H    | 3.109732  | 2.887879  | -1.785545 |
| C | -1.994974 | 0.472557  | 0.691791  | C    | 3.196370  | 0.826248  | -1.175949 |
| C | -2.543814 | 0.758596  | 1.978954  | C    | 3.296213  | -0.426354 | -0.777024 |
| C | -2.294842 | 2.027629  | 2.560181  | C    | 4.197589  | -1.546420 | -0.567430 |
| C | -1.587715 | 3.004420  | 1.841487  | C    | 4.376699  | -2.068702 | 0.739423  |
| H | -1.388382 | 3.974371  | 2.317247  | H    | 3.844381  | -1.598452 | 1.578158  |
| C | -1.094254 | 2.735607  | 0.562740  | C    | 5.219005  | -3.168801 | 0.947625  |
| H | -0.545049 | 3.524640  | 0.032338  | C    | 5.874314  | -3.782229 | -0.139301 |
| C | -1.275488 | 1.464251  | -0.020663 | H    | 6.518252  | -4.656856 | 0.027280  |
| C | -1.479801 | 0.030507  | -2.560729 | C    | 5.690038  | -3.276671 | -1.439449 |
| C | -2.801973 | 0.467341  | -2.806409 | H    | 6.196820  | -3.750112 | -2.290744 |
| H | -3.169396 | 1.394059  | -2.340178 | C    | 4.863832  | -2.161730 | -1.657455 |
| C | -3.654738 | -0.309164 | -3.603265 | H    | 4.709700  | -1.763405 | -2.669055 |
| H | -4.691983 | 0.019018  | -3.776459 | C    | 4.906091  | 2.566113  | -0.493260 |
| C | -3.199734 | -1.512457 | -4.162705 | H    | 4.859399  | 3.624356  | -0.141952 |
| H | -3.876487 | -2.124014 | -4.779469 | H    | 5.716212  | 2.502210  | -1.269304 |
| C | -1.884419 | -1.949493 | -3.924632 | H    | 5.191455  | 1.896240  | 0.341986  |
| H | -1.526316 | -2.897569 | -4.350389 | H    | 5.350374  | -3.562145 | 1.963938  |
| C | -1.026687 | -1.178538 | -3.122967 | O    | 2.307472  | 2.663861  | 0.517015  |
| H | 0.002689  | -1.511344 | -2.904507 | C    | 2.238215  | 3.769592  | 1.176526  |
| C | -0.136554 | 2.568941  | -2.523049 | O    | 1.782086  | 3.933566  | 2.313780  |
| C | 0.699543  | 3.591020  | -2.025025 | O    | 2.715141  | 4.853997  | 0.442336  |
| H | 1.215772  | 3.444933  | -1.064370 | C    | 2.641076  | 6.111367  | 1.114109  |
| C | 0.907832  | 4.769857  | -2.758761 | H    | 3.106521  | 6.855379  | 0.435757  |
| H | 1.559575  | 5.548936  | -2.336249 | H    | 1.590409  | 6.411132  | 1.321840  |
| C | 0.303119  | 4.929733  | -4.016497 | H    | 3.191262  | 6.094045  | 2.079807  |
| H | 0.472429  | 5.852128  | -4.595953 |      |           |           |           |
| C | -0.502484 | 3.908291  | -4.536804 | TS1C |           |           |           |
| H | -0.966404 | 4.018346  | -5.529867 | Ni   | -1.503727 | -0.708598 | 0.212606  |

|   |           |           |           |    |           |           |           |
|---|-----------|-----------|-----------|----|-----------|-----------|-----------|
| P | -0.689314 | 0.225189  | -1.535009 | H  | 4.767888  | -2.878696 | 2.452793  |
| P | 0.248796  | -0.844704 | 1.558337  | C  | 3.666049  | -3.939157 | 0.900939  |
| C | -1.503475 | -0.397690 | -3.079405 | H  | 4.471030  | -4.668307 | 0.720340  |
| C | -2.754513 | -1.031141 | -2.940417 | C  | 2.470931  | -4.013049 | 0.166654  |
| H | -3.178359 | -1.150942 | -1.931960 | H  | 2.339771  | -4.798340 | -0.594385 |
| C | -3.464439 | -1.465349 | -4.073208 | C  | 1.445222  | -3.079181 | 0.391261  |
| H | -4.437594 | -1.964652 | -3.946843 | H  | 0.503490  | -3.120553 | -0.177933 |
| C | -2.927765 | -1.264023 | -5.355755 | C  | -0.296149 | -1.097242 | 3.289162  |
| H | -3.477696 | -1.608507 | -6.245790 | C  | -1.293658 | -0.233906 | 3.816038  |
| C | -1.692651 | -0.603296 | -5.503788 | H  | -1.609057 | 0.653150  | 3.247285  |
| H | -1.281572 | -0.421824 | -6.509595 | C  | -1.902258 | -0.513137 | 5.047953  |
| C | -0.987382 | -0.162726 | -4.372862 | H  | -2.667449 | 0.174563  | 5.441941  |
| H | -0.033682 | 0.374797  | -4.494401 | C  | -1.556865 | -1.673806 | 5.766116  |
| C | -0.839171 | 2.023046  | -1.900182 | H  | -2.045837 | -1.898834 | 6.726851  |
| C | 0.254345  | 2.886074  | -2.084327 | C  | -0.583171 | -2.544921 | 5.243902  |
| H | 1.278754  | 2.493797  | -2.102846 | H  | -0.305419 | -3.456727 | 5.796572  |
| C | 0.043212  | 4.267127  | -2.246287 | C  | 0.044697  | -2.259803 | 4.020588  |
| H | 0.913268  | 4.934114  | -2.350678 | H  | 0.801201  | -2.952279 | 3.621583  |
| C | -1.261744 | 4.786710  | -2.269913 | O  | 3.009341  | 2.795996  | -0.912573 |
| H | -1.425289 | 5.869074  | -2.391907 | C  | 4.375513  | 3.215923  | -0.792062 |
| C | -2.361609 | 3.916603  | -2.143552 | H  | 4.457761  | 4.239043  | -0.371130 |
| H | -3.388485 | 4.312920  | -2.168454 | H  | 4.786775  | 3.206662  | -1.819027 |
| C | -2.152621 | 2.545787  | -1.947433 | H  | 4.943773  | 2.502550  | -0.162344 |
| H | -3.013482 | 1.871731  | -1.815445 | O  | 4.198672  | 0.161704  | 0.179975  |
| C | 1.092484  | -0.250429 | -1.697734 | C  | 5.542925  | -0.233719 | 0.446903  |
| C | 1.429974  | -1.285271 | -2.599289 | H  | 5.853667  | 0.388730  | 1.308091  |
| H | 0.680872  | -1.674294 | -3.301068 | H  | 6.211311  | -0.032770 | -0.414178 |
| C | 2.706998  | -1.844648 | -2.597610 | H  | 5.606425  | -1.303307 | 0.724262  |
| H | 2.964495  | -2.653285 | -3.297007 | Cl | 2.457180  | 5.108215  | 1.020650  |
| C | 3.693286  | -1.395898 | -1.705061 | Cl | 5.255686  | -2.202660 | -1.825022 |
| C | 3.391447  | -0.374484 | -0.771099 | C  | -3.916394 | -1.945950 | 1.440925  |
| C | 2.070108  | 0.179701  | -0.760843 | H  | -5.023420 | -1.942266 | 1.469268  |
| C | 1.800994  | 1.164634  | 0.342485  | C  | -3.299232 | -0.720180 | 1.148355  |
| C | 2.334095  | 2.473147  | 0.233038  | C  | -2.822617 | 0.456152  | 0.895619  |
| C | 2.089586  | 3.409245  | 1.265947  | C  | -2.937823 | 1.889375  | 1.077678  |
| C | 1.489231  | 3.007208  | 2.467631  | C  | -1.768384 | 2.688117  | 1.067775  |
| H | 1.348525  | 3.740913  | 3.274735  | H  | -0.803274 | 2.194074  | 0.911297  |
| C | 1.044079  | 1.687798  | 2.609714  | C  | -1.844000 | 4.075772  | 1.232188  |
| H | 0.575038  | 1.381492  | 3.554979  | C  | -3.097576 | 4.693829  | 1.384604  |
| C | 1.136697  | 0.770897  | 1.541123  | H  | -3.165069 | 5.787576  | 1.496181  |
| C | 1.620050  | -2.056010 | 1.345539  | C  | -4.271503 | 3.913770  | 1.387069  |
| C | 2.822598  | -1.981638 | 2.081157  | H  | -5.253479 | 4.398900  | 1.505198  |
| H | 2.960528  | -1.176606 | 2.819970  | C  | -4.196223 | 2.521031  | 1.242502  |
| C | 3.836785  | -2.927764 | 1.865757  | H  | -5.108679 | 1.904790  | 1.244396  |

|      |           |           |           |   |           |           |           |
|------|-----------|-----------|-----------|---|-----------|-----------|-----------|
| C    | -3.269403 | -2.883537 | 2.434775  | H | 1.228877  | -3.051042 | 3.801763  |
| H    | -3.758467 | -3.876433 | 2.415383  | C | 2.684739  | -1.772093 | 2.836142  |
| H    | -3.367728 | -2.456624 | 3.455950  | C | 3.010821  | -0.994226 | 1.702922  |
| H    | -2.188807 | -2.988458 | 2.225082  | C | 2.068931  | -0.872204 | 0.645995  |
| H    | -0.920319 | 4.674220  | 1.214156  | C | 2.425249  | 0.064115  | -0.471605 |
| O    | -3.939089 | -2.974082 | -0.083609 | C | 3.420521  | -0.378906 | -1.394703 |
| C    | -2.799514 | -3.217089 | -0.641018 | C | 3.772642  | 0.476744  | -2.467520 |
| O    | -1.696203 | -2.654913 | -0.447211 | C | 3.193248  | 1.753134  | -2.572725 |
| O    | -2.892598 | -4.210951 | -1.561257 | H | 3.499384  | 2.396524  | -3.410469 |
| C    | -1.704919 | -4.458146 | -2.331059 | C | 2.241140  | 2.190526  | -1.651505 |
| H    | -1.985116 | -5.226359 | -3.074708 | H | 1.800915  | 3.191204  | -1.763029 |
| H    | -1.367786 | -3.534203 | -2.843244 | C | 1.832033  | 1.345878  | -0.599454 |
| H    | -0.883557 | -4.834381 | -1.687487 | C | 0.957184  | 1.525111  | 2.150121  |
|      |           |           |           | C | 2.251259  | 1.914125  | 2.558226  |
| TS1D |           |           |           | H | 2.940725  | 2.368585  | 1.830405  |
| Ni   | -1.423323 | 0.593171  | 0.025661  | C | 2.674007  | 1.676194  | 3.874048  |
| P    | -0.458806 | -1.248760 | -0.553111 | H | 3.692824  | 1.958840  | 4.180430  |
| P    | 0.361853  | 1.788235  | 0.429109  | C | 1.809853  | 1.048364  | 4.789494  |
| C    | -1.523869 | -2.751535 | -0.653079 | H | 2.149987  | 0.847266  | 5.817096  |
| C    | -2.829740 | -2.527514 | -1.142765 | C | 0.521717  | 0.658957  | 4.385744  |
| H    | -3.129287 | -1.503233 | -1.416892 | H | -0.151963 | 0.155084  | 5.096579  |
| C    | -3.735917 | -3.590100 | -1.262148 | C | 0.094280  | 0.895572  | 3.068945  |
| H    | -4.754546 | -3.399690 | -1.633454 | H | -0.904470 | 0.579578  | 2.727784  |
| C    | -3.352018 | -4.888430 | -0.882005 | C | 0.231498  | 3.623571  | 0.288917  |
| H    | -4.070137 | -5.720404 | -0.953529 | C | -0.387619 | 4.141834  | -0.874562 |
| C    | -2.047706 | -5.122667 | -0.413562 | H | -0.762601 | 3.442811  | -1.638815 |
| H    | -1.737640 | -6.140543 | -0.128161 | C | -0.574341 | 5.525941  | -1.020167 |
| C    | -1.131427 | -4.061281 | -0.309297 | H | -1.055204 | 5.915916  | -1.931331 |
| H    | -0.110550 | -4.259566 | 0.050830  | C | -0.172412 | 6.407683  | -0.000198 |
| C    | 0.441346  | -1.367507 | -2.161574 | H | -0.328339 | 7.492381  | -0.111649 |
| C    | 0.303795  | -0.320554 | -3.093937 | C | 0.415676  | 5.895370  | 1.168975  |
| H    | -0.344575 | 0.534928  | -2.850046 | H | 0.719884  | 6.577231  | 1.979058  |
| C    | 0.988756  | -0.387242 | -4.318970 | C | 0.618828  | 4.511915  | 1.314827  |
| H    | 0.894814  | 0.440164  | -5.039685 | H | 1.075112  | 4.123188  | 2.237007  |
| C    | 1.794203  | -1.497421 | -4.622884 | O | 3.878869  | -1.627520 | -1.118909 |
| H    | 2.336323  | -1.541384 | -5.580135 | C | 4.945394  | -2.278131 | -1.804026 |
| C    | 1.907249  | -2.555365 | -3.701531 | H | 5.113297  | -3.218139 | -1.243485 |
| H    | 2.525887  | -3.434357 | -3.943187 | H | 5.874335  | -1.673028 | -1.794250 |
| C    | 1.234835  | -2.491613 | -2.472222 | H | 4.673519  | -2.518318 | -2.850540 |
| H    | 1.341093  | -3.310210 | -1.744152 | O | 4.160141  | -0.268403 | 1.599095  |
| C    | 0.844741  | -1.588910 | 0.703644  | C | 5.413384  | -0.961750 | 1.617986  |
| C    | 0.560755  | -2.375247 | 1.841537  | H | 6.114656  | -0.356741 | 1.010327  |
| H    | -0.391694 | -2.918492 | 1.910026  | H | 5.315880  | -1.968182 | 1.161672  |
| C    | 1.465591  | -2.462589 | 2.903622  | H | 5.809784  | -1.063661 | 2.649209  |

|      |           |           |           |   |           |           |           |
|------|-----------|-----------|-----------|---|-----------|-----------|-----------|
| Cl   | 4.893522  | 0.036355  | -3.755026 | H | 1.302932  | -4.208814 | 0.487046  |
| Cl   | 3.760249  | -1.816518 | 4.219604  | C | -0.239691 | -2.285695 | 1.310672  |
| C    | -2.908889 | 1.557698  | 0.756172  | C | 0.036618  | -1.813950 | 2.609768  |
| C    | -3.045030 | 0.264360  | 0.918474  | H | 0.657276  | -0.911245 | 2.723118  |
| C    | -3.853443 | -0.856972 | 1.341931  | C | -0.533901 | -2.458811 | 3.719516  |
| C    | -3.254646 | -1.977526 | 1.968308  | H | -0.339934 | -2.072098 | 4.732022  |
| H    | -2.177881 | -1.936397 | 2.184292  | C | -1.365465 | -3.577059 | 3.539569  |
| C    | -4.010705 | -3.110851 | 2.287573  | H | -1.817116 | -4.074699 | 4.411925  |
| C    | -5.379657 | -3.158285 | 1.964604  | C | -1.633773 | -4.053087 | 2.242746  |
| H    | -5.970443 | -4.059380 | 2.191665  | H | -2.288796 | -4.926963 | 2.098687  |
| C    | -5.991477 | -2.050095 | 1.349996  | C | -1.083636 | -3.403331 | 1.127585  |
| H    | -7.064224 | -2.080405 | 1.101411  | H | -1.322349 | -3.752110 | 0.110876  |
| C    | -5.241734 | -0.901718 | 1.056303  | C | -1.030519 | -1.252345 | -1.226800 |
| H    | -5.716849 | -0.031899 | 0.576899  | C | -1.024140 | -1.748861 | -2.545814 |
| C    | -4.775521 | 3.268472  | 0.956615  | H | -0.156883 | -2.307780 | -2.921819 |
| H    | -5.193888 | 4.101830  | 0.358588  | C | -2.107786 | -1.527475 | -3.403133 |
| H    | -4.627236 | 3.628880  | 1.997066  | H | -2.084792 | -1.881059 | -4.444163 |
| H    | -5.502234 | 2.433537  | 0.980781  | C | -3.230045 | -0.825872 | -2.941857 |
| H    | -3.526252 | -3.974799 | 2.768233  | C | -3.297764 | -0.379108 | -1.602880 |
| O    | -3.921364 | 2.602674  | -1.334351 | C | -2.181700 | -0.574783 | -0.748766 |
| C    | -3.184449 | 1.771068  | -2.013086 | C | -2.299100 | -0.053725 | 0.651305  |
| O    | -1.944055 | 1.689421  | -2.013697 | C | -3.133891 | -0.791315 | 1.543525  |
| O    | -3.868028 | 0.860282  | -2.774249 | C | -3.210007 | -0.369241 | 2.893643  |
| C    | -5.298117 | 0.852619  | -2.688984 | C | -2.547289 | 0.798372  | 3.309980  |
| H    | -5.637739 | 0.055376  | -3.376521 | H | -2.634429 | 1.101521  | 4.363434  |
| H    | -5.636697 | 0.625551  | -1.657176 | C | -1.774870 | 1.545094  | 2.418860  |
| H    | -5.728888 | 1.826752  | -2.998011 | H | -1.261892 | 2.449021  | 2.772521  |
| C    | -3.446494 | 2.822072  | 0.402617  | C | -1.631326 | 1.117434  | 1.084208  |
| H    | -2.706030 | 3.630919  | 0.266583  | C | -1.151292 | 2.082922  | -1.636089 |
|      |           |           |           | C | -2.450808 | 2.616259  | -1.775355 |
| IM2A |           |           |           | H | -3.024879 | 2.899691  | -0.880211 |
| Ni   | 1.455710  | 0.600882  | 0.142533  | C | -3.022813 | 2.742123  | -3.049307 |
| P    | 0.461670  | -1.376875 | -0.125967 | H | -4.045794 | 3.134819  | -3.153159 |
| P    | -0.354818 | 1.881228  | 0.000531  | C | -2.302041 | 2.339936  | -4.188578 |
| C    | 1.501290  | -2.625878 | -0.995086 | H | -2.760240 | 2.423909  | -5.186040 |
| C    | 2.136740  | -2.241507 | -2.199549 | C | -1.006504 | 1.812776  | -4.052768 |
| H    | 1.977150  | -1.227229 | -2.597525 | H | -0.446213 | 1.486835  | -4.942955 |
| C    | 2.989068  | -3.126657 | -2.872928 | C | -0.430131 | 1.684828  | -2.778548 |
| H    | 3.477620  | -2.809536 | -3.806874 | H | 0.576227  | 1.254449  | -2.648806 |
| C    | 3.247356  | -4.400351 | -2.335244 | C | -0.102221 | 3.612093  | 0.582204  |
| H    | 3.932795  | -5.089453 | -2.852639 | C | 0.599347  | 3.833597  | 1.792304  |
| C    | 2.640860  | -4.781460 | -1.127350 | H | 0.937994  | 2.978498  | 2.397050  |
| H    | 2.847931  | -5.772556 | -0.693699 | C | 0.911954  | 5.140627  | 2.195576  |
| C    | 1.768939  | -3.902521 | -0.461038 | H | 1.463018  | 5.289540  | 3.137301  |

|    |           |           |           |      |           |           |           |
|----|-----------|-----------|-----------|------|-----------|-----------|-----------|
| C  | 0.550535  | 6.241296  | 1.398017  | H    | 2.381102  | 3.885992  | -0.472402 |
| H  | 0.806464  | 7.265005  | 1.714265  |      |           |           |           |
| C  | -0.127690 | 6.025189  | 0.186774  | IM2B |           |           |           |
| H  | -0.404904 | 6.877687  | -0.453515 | Ni   | 1.114755  | 1.108328  | -0.917203 |
| C  | -0.451982 | 4.719700  | -0.222138 | P    | 0.915250  | -1.004920 | -0.451744 |
| H  | -0.968531 | 4.567142  | -1.180385 | P    | -0.956917 | 1.650100  | -0.595682 |
| O  | -3.725636 | -1.867331 | 0.962365  | C    | 2.004984  | -2.040954 | -1.515172 |
| C  | -4.809470 | -2.595882 | 1.531305  | C    | 1.987783  | -1.798076 | -2.907438 |
| H  | -5.209343 | -3.213297 | 0.703521  | H    | 1.342057  | -1.002643 | -3.312361 |
| H  | -5.606976 | -1.923248 | 1.907230  | C    | 2.795298  | -2.554468 | -3.769441 |
| H  | -4.471004 | -3.258856 | 2.351885  | H    | 2.766556  | -2.363524 | -4.853734 |
| O  | -4.350926 | 0.313231  | -1.088998 | C    | 3.652726  | -3.539518 | -3.246733 |
| C  | -5.659028 | -0.268270 | -1.131922 | H    | 4.297624  | -4.124349 | -3.921103 |
| H  | -6.162358 | 0.011262  | -0.184825 | C    | 3.701489  | -3.756580 | -1.860112 |
| H  | -5.603336 | -1.373980 | -1.199649 | H    | 4.391869  | -4.504908 | -1.441291 |
| H  | -6.245319 | 0.119060  | -1.990134 | C    | 2.878885  | -3.014743 | -0.995621 |
| Cl | -4.051686 | -1.271277 | 4.151191  | H    | 2.930513  | -3.182490 | 0.089551  |
| Cl | -4.516752 | -0.445370 | -4.069473 | C    | 1.176079  | -1.647814 | 1.252073  |
| C  | 2.804805  | 1.804091  | -0.533599 | C    | 1.705774  | -0.787640 | 2.229349  |
| C  | 3.144900  | 0.498621  | -0.514038 | H    | 1.994502  | 0.240976  | 1.971522  |
| C  | 4.188911  | -0.449149 | -0.785877 | C    | 1.869744  | -1.241662 | 3.547571  |
| C  | 4.292212  | -1.625546 | 0.004308  | H    | 2.273464  | -0.551190 | 4.303847  |
| H  | 3.590031  | -1.744452 | 0.840440  | C    | 1.513121  | -2.555860 | 3.891949  |
| C  | 5.281633  | -2.574012 | -0.270237 | H    | 1.634955  | -2.908863 | 4.928017  |
| C  | 6.159700  | -2.385337 | -1.355016 | C    | 0.991572  | -3.421334 | 2.911642  |
| H  | 6.923215  | -3.145507 | -1.583367 | H    | 0.712069  | -4.453334 | 3.176859  |
| C  | 6.064959  | -1.225963 | -2.148973 | C    | 0.811177  | -2.968391 | 1.595824  |
| H  | 6.754017  | -1.080092 | -2.995666 | H    | 0.370889  | -3.634520 | 0.837799  |
| C  | 5.101387  | -0.252381 | -1.857201 | C    | -0.757864 | -1.722737 | -0.809496 |
| H  | 5.015638  | 0.656088  | -2.472808 | C    | -0.979629 | -2.604850 | -1.885256 |
| C  | 4.484006  | 3.591801  | -1.157638 | H    | -0.139193 | -2.946289 | -2.504067 |
| H  | 4.904975  | 4.327008  | -0.435872 | C    | -2.273207 | -3.039317 | -2.195627 |
| H  | 4.410217  | 4.129281  | -2.131244 | H    | -2.455620 | -3.695121 | -3.059284 |
| H  | 5.206789  | 2.760129  | -1.271540 | C    | -3.360487 | -2.609268 | -1.421639 |
| H  | 5.357683  | -3.480140 | 0.349794  | C    | -3.159762 | -1.781674 | -0.292931 |
| O  | 2.763455  | 1.919364  | 3.645796  | C    | -1.850133 | -1.327303 | 0.001648  |
| C  | 2.499792  | 1.050692  | 2.809112  | C    | -1.664466 | -0.435180 | 1.188752  |
| O  | 1.388996  | 0.910380  | 2.163490  | C    | -1.772796 | -1.051512 | 2.474124  |
| O  | 3.429643  | 0.065172  | 2.493742  | C    | -1.475151 | -0.271442 | 3.618099  |
| C  | 4.705467  | 0.202577  | 3.114167  | C    | -1.152999 | 1.089380  | 3.480809  |
| H  | 5.329416  | -0.625252 | 2.724017  | H    | -0.922642 | 1.667245  | 4.387323  |
| H  | 5.176060  | 1.175471  | 2.858758  | C    | -1.097737 | 1.697496  | 2.226390  |
| H  | 4.631559  | 0.134396  | 4.220464  | H    | -0.818486 | 2.754600  | 2.165472  |
| C  | 3.136986  | 3.112554  | -0.699881 | C    | -1.344171 | 0.938276  | 1.064993  |

|    |           |           |           |      |           |           |           |
|----|-----------|-----------|-----------|------|-----------|-----------|-----------|
| C  | -2.238808 | 0.986860  | -1.728938 | C    | 6.069214  | -1.357495 | -1.710111 |
| C  | -3.609271 | 1.063292  | -1.397749 | H    | 6.676831  | -1.853347 | -2.483311 |
| H  | -3.914845 | 1.468971  | -0.421430 | C    | 5.016949  | -0.516368 | -2.091749 |
| C  | -4.573940 | 0.596826  | -2.300600 | H    | 4.783303  | -0.355648 | -3.154058 |
| H  | -5.639964 | 0.637073  | -2.030154 | C    | 1.428354  | 4.021401  | -2.175976 |
| C  | -4.178679 | 0.056702  | -3.538707 | H    | 1.845356  | 4.156880  | -1.159910 |
| H  | -4.937780 | -0.320664 | -4.240911 | H    | 0.415515  | 4.464713  | -2.209991 |
| C  | -2.815773 | -0.018954 | -3.870433 | H    | 2.060788  | 4.572946  | -2.906431 |
| H  | -2.503474 | -0.453844 | -4.832509 | H    | 5.774556  | -1.103240 | 1.702353  |
| C  | -1.846065 | 0.446780  | -2.966787 | O    | 1.577709  | 2.533165  | 0.636957  |
| H  | -0.771083 | 0.373706  | -3.196218 | C    | 2.137137  | 2.636747  | 1.771804  |
| C  | -1.392535 | 3.448538  | -0.568375 | O    | 3.051427  | 1.969365  | 2.289246  |
| C  | -0.753568 | 4.354022  | 0.310912  | O    | 1.575973  | 3.693162  | 2.518993  |
| H  | 0.027113  | 4.003843  | 0.998137  | C    | 2.103262  | 3.872321  | 3.829787  |
| C  | -1.045971 | 5.725948  | 0.250905  | H    | 1.586055  | 4.753152  | 4.258993  |
| H  | -0.537105 | 6.409131  | 0.948946  | H    | 1.918036  | 2.982677  | 4.470425  |
| C  | -1.948668 | 6.227422  | -0.701084 | H    | 3.198996  | 4.052090  | 3.810053  |
| H  | -2.166928 | 7.305956  | -0.749709 |      |           |           |           |
| C  | -2.558236 | 5.339774  | -1.603448 | IM2C |           |           |           |
| H  | -3.255667 | 5.716278  | -2.368334 | Ni   | 1.703945  | 0.533099  | 0.151251  |
| C  | -2.285278 | 3.963480  | -1.539066 | P    | 0.040270  | 0.751107  | 1.620020  |
| H  | -2.770071 | 3.292356  | -2.260406 | P    | 0.786227  | -0.953189 | -1.214945 |
| O  | -2.106990 | -2.365219 | 2.410217  | C    | 0.611469  | 0.877028  | 3.370159  |
| C  | -2.472869 | -3.167870 | 3.529447  | C    | 1.990666  | 0.928732  | 3.643854  |
| H  | -2.868304 | -4.105368 | 3.092801  | H    | 2.733663  | 0.867610  | 2.830654  |
| H  | -3.260728 | -2.686254 | 4.142948  | C    | 2.430690  | 1.097944  | 4.970416  |
| H  | -1.598050 | -3.401705 | 4.167365  | H    | 3.512458  | 1.139630  | 5.172736  |
| O  | -4.164416 | -1.305313 | 0.490652  | C    | 1.504275  | 1.216823  | 6.018278  |
| C  | -5.060549 | -2.227402 | 1.122810  | H    | 1.853594  | 1.346749  | 7.055041  |
| H  | -5.309512 | -1.796958 | 2.113011  | C    | 0.123033  | 1.186661  | 5.740633  |
| H  | -4.578687 | -3.215698 | 1.268353  | H    | -0.608684 | 1.298909  | 6.556399  |
| H  | -5.989999 | -2.358247 | 0.532159  | C    | -0.323403 | 1.027396  | 4.421239  |
| Cl | -1.412860 | -0.915400 | 5.255452  | H    | -1.402952 | 1.027467  | 4.201701  |
| Cl | -4.981885 | -3.038912 | -1.927978 | C    | -1.002833 | 2.266735  | 1.598201  |
| C  | 1.383177  | 2.551920  | -2.532961 | C    | -2.397001 | 2.260093  | 1.423711  |
| H  | 0.748306  | 2.287248  | -3.401530 | H    | -2.945582 | 1.314009  | 1.331768  |
| C  | 2.458838  | 1.714058  | -2.263788 | C    | -3.102804 | 3.475203  | 1.363118  |
| C  | 3.083416  | 0.911959  | -1.487541 | H    | -4.191071 | 3.456696  | 1.195416  |
| C  | 4.212875  | 0.108257  | -1.105344 | C    | -2.426079 | 4.696494  | 1.514623  |
| C  | 4.503951  | -0.096474 | 0.266799  | H    | -2.980494 | 5.646686  | 1.463617  |
| H  | 3.918103  | 0.448356  | 1.025927  | C    | -1.035968 | 4.702782  | 1.736907  |
| C  | 5.557996  | -0.944496 | 0.634187  | H    | -0.498277 | 5.655274  | 1.860877  |
| C  | 6.336102  | -1.585351 | -0.347119 | C    | -0.325332 | 3.496655  | 1.766705  |
| H  | 7.155844  | -2.259204 | -0.051429 | H    | 0.766596  | 3.502198  | 1.911512  |



|   |           |           |           |      |           |           |           |
|---|-----------|-----------|-----------|------|-----------|-----------|-----------|
| C | -1.116081 | -0.691952 | 1.612707  | C    | -4.071633 | -3.576728 | -1.093062 |
| C | -1.090612 | -1.579974 | 2.709860  | H    | -4.435010 | -3.365708 | -2.117142 |
| H | -0.491385 | -1.344178 | 3.598683  | H    | -4.936287 | -3.668394 | -0.406013 |
| C | -1.800883 | -2.778826 | 2.668625  | H    | -3.497443 | -4.523280 | -1.094155 |
| H | -1.770419 | -3.475890 | 3.518454  | Cl   | -4.567306 | 2.198967  | -2.640712 |
| C | -2.555784 | -3.135189 | 1.540072  | Cl   | -3.365148 | -4.696552 | 1.623324  |
| C | -2.602699 | -2.274301 | 0.416392  | C    | 4.201924  | 1.369142  | -1.526534 |
| C | -1.858409 | -1.050046 | 0.459164  | H    | 4.591522  | 2.227461  | -2.111337 |
| C | -1.898323 | -0.245184 | -0.808861 | C    | 3.012435  | 1.529525  | -0.889995 |
| C | -3.106750 | 0.423643  | -1.132619 | C    | 1.849020  | 2.152883  | -0.658790 |
| C | -3.196141 | 1.147417  | -2.345653 | C    | 1.052579  | 3.293485  | -1.027772 |
| C | -2.168528 | 1.079925  | -3.296093 | C    | -0.343547 | 3.148484  | -1.239701 |
| H | -2.274550 | 1.621442  | -4.247037 | H    | -0.796226 | 2.164054  | -1.087735 |
| C | -1.002759 | 0.360725  | -3.005555 | C    | -1.123908 | 4.237754  | -1.639098 |
| H | -0.205523 | 0.312464  | -3.758678 | C    | -0.533630 | 5.506229  | -1.784641 |
| C | -0.832997 | -0.263444 | -1.753036 | H    | -1.150012 | 6.372418  | -2.072306 |
| C | 0.373531  | -2.680531 | -0.753797 | C    | 0.848679  | 5.670870  | -1.560476 |
| C | -0.390286 | -3.489743 | -1.624393 | H    | 1.309427  | 6.664796  | -1.674788 |
| H | -0.744264 | -3.082186 | -2.584037 | C    | 1.644419  | 4.573013  | -1.209504 |
| C | -0.700775 | -4.807263 | -1.256920 | H    | 2.726544  | 4.690466  | -1.045257 |
| H | -1.286904 | -5.443183 | -1.939142 | C    | 5.033254  | 0.127817  | -1.480696 |
| C | -0.264299 | -5.316228 | -0.018794 | H    | 5.880677  | 0.235495  | -0.767136 |
| H | -0.523339 | -6.345359 | 0.273854  | H    | 5.464149  | -0.100631 | -2.478908 |
| C | 0.495574  | -4.509198 | 0.843673  | H    | 4.425144  | -0.733765 | -1.145427 |
| H | 0.832014  | -4.903915 | 1.815041  | H    | -2.201814 | 4.097103  | -1.810697 |
| C | 0.822636  | -3.192119 | 0.479067  | O    | 4.470273  | 0.482760  | 1.758991  |
| H | 1.424797  | -2.541853 | 1.131794  | C    | 3.998458  | -0.615334 | 1.447132  |
| C | 1.842863  | -1.131206 | -2.694869 | O    | 2.797538  | -0.896404 | 1.056345  |
| C | 2.204364  | 0.011910  | -3.451272 | O    | 4.853133  | -1.705711 | 1.528502  |
| H | 1.767847  | 0.992399  | -3.217564 | C    | 4.344920  | -2.972301 | 1.121402  |
| C | 3.129522  | -0.094964 | -4.502495 | H    | 5.203441  | -3.672761 | 1.135317  |
| H | 3.388627  | 0.800974  | -5.087854 | H    | 3.560358  | -3.346597 | 1.814502  |
| C | 3.745463  | -1.325448 | -4.782447 | H    | 3.908403  | -2.936607 | 0.100061  |
| H | 4.483708  | -1.402518 | -5.595805 |      |           |           |           |
| C | 3.419490  | -2.458185 | -4.012785 | IM2D |           |           |           |
| H | 3.902190  | -3.425819 | -4.221423 | Ni   | -1.535361 | 0.626045  | -0.260772 |
| C | 2.476523  | -2.365046 | -2.979230 | P    | -0.380770 | -1.209893 | -0.818281 |
| H | 2.227192  | -3.256670 | -2.385443 | P    | 0.162422  | 1.737296  | 0.630259  |
| O | -4.118387 | 0.365763  | -0.221594 | C    | -1.424633 | -2.705859 | -1.082015 |
| C | -5.403655 | -0.116894 | -0.639706 | C    | -2.753197 | -2.455620 | -1.490792 |
| H | -6.079592 | 0.719572  | -0.909258 | H    | -3.076986 | -1.412827 | -1.639133 |
| H | -5.824375 | -0.672510 | 0.221112  | C    | -3.643319 | -3.520787 | -1.692778 |
| H | -5.304767 | -0.805157 | -1.503161 | H    | -4.680290 | -3.312976 | -1.998442 |
| O | -3.246757 | -2.460788 | -0.763077 | C    | -3.219940 | -4.844242 | -1.482266 |

|   |           |           |           |    |           |           |           |
|---|-----------|-----------|-----------|----|-----------|-----------|-----------|
| H | -3.924671 | -5.679328 | -1.620272 | C  | -0.626797 | 4.191032  | -0.455873 |
| C | -1.890955 | -5.101368 | -1.101094 | H  | -0.770746 | 3.604307  | -1.377773 |
| H | -1.549410 | -6.137723 | -0.950557 | C  | -0.967076 | 5.552125  | -0.413430 |
| C | -0.992459 | -4.038240 | -0.910007 | H  | -1.332140 | 6.044401  | -1.328424 |
| H | 0.044616  | -4.255493 | -0.613670 | C  | -0.866886 | 6.273934  | 0.789850  |
| C | 0.705772  | -1.207195 | -2.313295 | H  | -1.142375 | 7.339941  | 0.821117  |
| C | 0.688927  | -0.095465 | -3.179666 | C  | -0.429869 | 5.624247  | 1.956946  |
| H | 0.035695  | 0.758974  | -2.942102 | H  | -0.364144 | 6.177712  | 2.907054  |
| C | 1.526268  | -0.079276 | -4.307510 | C  | -0.076704 | 4.264461  | 1.922608  |
| H | 1.525603  | 0.800625  | -4.969541 | H  | 0.256382  | 3.764810  | 2.843910  |
| C | 2.369261  | -1.168337 | -4.583482 | O  | 4.004847  | -1.264698 | -0.950526 |
| H | 3.028167  | -1.148296 | -5.465379 | C  | 5.165216  | -1.774967 | -1.602136 |
| C | 2.375292  | -2.283784 | -3.725517 | H  | 5.352096  | -2.755609 | -1.123549 |
| H | 3.030078  | -3.143365 | -3.939851 | H  | 6.045630  | -1.118225 | -1.453201 |
| C | 1.551522  | -2.302562 | -2.590096 | H  | 4.992691  | -1.922559 | -2.686117 |
| H | 1.583380  | -3.165287 | -1.908047 | O  | 3.929019  | -0.223041 | 1.887680  |
| C | 0.814348  | -1.628262 | 0.528748  | C  | 5.232807  | -0.810914 | 1.978309  |
| C | 0.520789  | -2.603614 | 1.505485  | H  | 5.922556  | -0.130931 | 1.440307  |
| H | -0.367440 | -3.239392 | 1.399299  | H  | 5.254678  | -1.807180 | 1.491156  |
| C | 1.342034  | -2.778820 | 2.624127  | H  | 5.559989  | -0.911656 | 3.033271  |
| H | 1.089992  | -3.517034 | 3.399010  | Cl | 5.119966  | 0.736026  | -3.294028 |
| C | 2.491293  | -1.990041 | 2.774406  | Cl | 3.445122  | -2.150627 | 4.234798  |
| C | 2.841868  | -1.036634 | 1.792462  | C  | -3.080066 | 1.453316  | 0.538264  |
| C | 1.981428  | -0.833593 | 0.680107  | C  | -2.975380 | 0.125737  | 0.737389  |
| C | 2.373995  | 0.246734  | -0.283087 | C  | -3.695230 | -1.037241 | 1.179164  |
| C | 3.478416  | -0.029147 | -1.145236 | C  | -3.021886 | -2.176280 | 1.687455  |
| C | 3.858282  | 0.960205  | -2.086010 | H  | -1.935136 | -2.116623 | 1.826542  |
| C | 3.193793  | 2.198966  | -2.119240 | C  | -3.724630 | -3.342799 | 2.002821  |
| H | 3.520044  | 2.945360  | -2.857903 | C  | -5.114732 | -3.408541 | 1.788168  |
| C | 2.138555  | 2.476591  | -1.249821 | H  | -5.665618 | -4.335426 | 2.011083  |
| H | 1.637816  | 3.453109  | -1.298465 | C  | -5.799385 | -2.282735 | 1.291085  |
| C | 1.712201  | 1.499514  | -0.327487 | H  | -6.887644 | -2.328767 | 1.126887  |
| C | 0.596894  | 1.264605  | 2.346877  | C  | -5.106221 | -1.097871 | 1.010742  |
| C | 1.807165  | 1.696758  | 2.932621  | H  | -5.634220 | -0.217247 | 0.614595  |
| H | 2.510199  | 2.309560  | 2.348361  | C  | -4.935876 | 2.927419  | 1.414603  |
| C | 2.129278  | 1.309219  | 4.241048  | H  | -5.742077 | 3.310161  | 0.748230  |
| H | 3.083887  | 1.629482  | 4.685614  | H  | -4.774381 | 3.716277  | 2.183542  |
| C | 1.248836  | 0.491116  | 4.971837  | H  | -5.305827 | 2.015610  | 1.923892  |
| H | 1.512171  | 0.174766  | 5.992783  | H  | -3.184420 | -4.217467 | 2.397276  |
| C | 0.042275  | 0.063882  | 4.392475  | O  | -2.843015 | 2.762290  | -3.376672 |
| H | -0.645545 | -0.584255 | 4.957434  | C  | -2.538257 | 1.827500  | -2.636931 |
| C | -0.284978 | 0.449700  | 3.082797  | O  | -1.443527 | 1.696658  | -1.956395 |
| H | -1.219444 | 0.109106  | 2.611027  | O  | -3.397845 | 0.745063  | -2.458547 |
| C | -0.155307 | 3.541923  | 0.711959  | C  | -4.671889 | 0.862144  | -3.086556 |

|      |           |           |           |    |           |           |           |
|------|-----------|-----------|-----------|----|-----------|-----------|-----------|
| H    | -5.208290 | -0.083941 | -2.877895 | H  | -0.850010 | 2.903932  | -4.073089 |
| H    | -5.247668 | 1.716936  | -2.671465 | C  | -0.459071 | 1.064421  | -2.974888 |
| H    | -4.575119 | 1.009499  | -4.182601 | H  | 0.242458  | 0.690859  | -3.731817 |
| C    | -3.672255 | 2.667919  | 0.643576  | C  | -0.708223 | 0.315233  | -1.807060 |
| H    | -3.200631 | 3.529588  | 0.136925  | C  | -0.999018 | -2.434433 | -1.027218 |
|      |           |           |           | C  | -2.014379 | -2.702867 | -1.970634 |
| IM3A |           |           |           | H  | -2.020922 | -2.171898 | -2.935000 |
| Ni   | 1.753514  | -0.490395 | 0.114409  | C  | -3.021541 | -3.631446 | -1.667045 |
| P    | 0.316299  | 0.241256  | 1.712493  | H  | -3.813032 | -3.841217 | -2.403563 |
| P    | 0.288140  | -1.171200 | -1.372686 | C  | -3.026570 | -4.285215 | -0.421266 |
| C    | 0.646927  | -0.410134 | 3.407538  | H  | -3.828321 | -4.998968 | -0.178378 |
| C    | 1.023478  | -1.762442 | 3.551717  | C  | -2.017809 | -4.015316 | 0.519362  |
| H    | 1.210071  | -2.366278 | 2.651102  | H  | -2.027881 | -4.512133 | 1.501380  |
| C    | 1.203204  | -2.312114 | 4.829825  | C  | -1.002393 | -3.095265 | 0.216189  |
| H    | 1.507263  | -3.365773 | 4.930488  | H  | -0.224932 | -2.852395 | 0.954744  |
| C    | 1.019307  | -1.516202 | 5.974935  | C  | 1.129251  | -1.765724 | -2.881847 |
| H    | 1.168609  | -1.946677 | 6.977747  | C  | 2.066276  | -0.930506 | -3.541923 |
| C    | 0.654374  | -0.166047 | 5.834881  | H  | 2.193331  | 0.114285  | -3.231206 |
| H    | 0.513283  | 0.464598  | 6.726926  | C  | 2.859096  | -1.437347 | -4.583596 |
| C    | 0.466288  | 0.387272  | 4.556604  | H  | 3.578632  | -0.773427 | -5.087448 |
| H    | 0.171778  | 1.442271  | 4.453581  | C  | 2.760361  | -2.787661 | -4.958339 |
| C    | 0.337122  | 2.049634  | 2.009629  | H  | 3.396832  | -3.186748 | -5.763312 |
| C    | -0.814128 | 2.855946  | 1.943652  | C  | 1.845487  | -3.628530 | -4.296719 |
| H    | -1.795677 | 2.409929  | 1.727963  | H  | 1.762150  | -4.688623 | -4.583078 |
| C    | -0.703578 | 4.245680  | 2.126894  | C  | 1.036514  | -3.125107 | -3.268084 |
| H    | -1.604606 | 4.874481  | 2.050993  | H  | 0.332176  | -3.793635 | -2.751683 |
| C    | 0.545946  | 4.827399  | 2.398879  | O  | -3.192985 | 2.451295  | -0.137993 |
| H    | 0.629457  | 5.916727  | 2.537204  | C  | -4.533014 | 2.781227  | -0.530441 |
| C    | 1.693834  | 4.017261  | 2.486792  | H  | -4.682082 | 3.879824  | -0.538122 |
| H    | 2.676325  | 4.469012  | 2.692588  | H  | -5.210024 | 2.320578  | 0.217056  |
| C    | 1.595315  | 2.635101  | 2.280133  | H  | -4.767666 | 2.373848  | -1.534170 |
| H    | 2.492744  | 1.996724  | 2.315886  | O  | -3.953278 | -0.365428 | -1.159699 |
| C    | -1.477767 | -0.206158 | 1.515685  | C  | -5.283360 | -0.652013 | -1.587313 |
| C    | -2.120774 | -0.915174 | 2.554512  | H  | -5.375132 | -0.164914 | -2.577174 |
| H    | -1.618333 | -1.057849 | 3.519256  | H  | -6.040228 | -0.229383 | -0.896581 |
| C    | -3.381869 | -1.477029 | 2.360352  | H  | -5.452559 | -1.741194 | -1.696362 |
| H    | -3.866490 | -2.053883 | 3.161331  | Cl | -2.609326 | 4.424516  | -2.410034 |
| C    | -4.041941 | -1.357226 | 1.127254  | Cl | -5.556037 | -2.241555 | 0.973086  |
| C    | -3.460974 | -0.597834 | 0.083694  | C  | 4.459644  | -0.436332 | -1.540853 |
| C    | -2.166223 | -0.019555 | 0.293837  | H  | 4.988315  | 0.314210  | -2.164784 |
| C    | -1.657035 | 0.790999  | -0.861655 | C  | 3.359993  | 0.014691  | -0.877633 |
| C    | -2.302436 | 2.037875  | -1.081609 | C  | 2.528865  | 1.019207  | -0.571265 |
| C    | -1.971079 | 2.802744  | -2.223613 | C  | 2.389762  | 2.438877  | -0.737188 |
| C    | -1.080673 | 2.301375  | -3.183007 | C  | 1.117890  | 3.062090  | -0.773135 |

|      |           |           |           |   |           |           |           |
|------|-----------|-----------|-----------|---|-----------|-----------|-----------|
| H    | 0.227317  | 2.438884  | -0.659551 | C | 1.532860  | -3.468096 | 2.958121  |
| C    | 1.002565  | 4.443944  | -0.947466 | H | 1.567145  | -4.552150 | 3.150547  |
| C    | 2.158980  | 5.239069  | -1.049036 | C | 1.350572  | -2.996722 | 1.648814  |
| H    | 2.070587  | 6.330993  | -1.162466 | H | 1.225871  | -3.710311 | 0.819252  |
| C    | 3.432811  | 4.636975  | -1.002863 | C | -0.459328 | -1.815004 | -0.883861 |
| H    | 4.338926  | 5.258643  | -1.078837 | C | -0.436000 | -2.624619 | -2.037182 |
| C    | 3.553021  | 3.248450  | -0.871938 | H | 0.517977  | -2.871930 | -2.521538 |
| H    | 4.543328  | 2.769424  | -0.835609 | C | -1.625255 | -3.095598 | -2.607723 |
| C    | 5.009492  | -1.828874 | -1.542996 | H | -1.606143 | -3.692982 | -3.530853 |
| H    | 6.088558  | -1.831533 | -1.797303 | C | -2.860501 | -2.758414 | -2.038284 |
| H    | 4.497090  | -2.450113 | -2.316915 | C | -2.922718 | -2.017905 | -0.832450 |
| H    | 4.874973  | -2.334824 | -0.566925 | C | -1.709990 | -1.560353 | -0.253821 |
| H    | 0.002876  | 4.901677  | -0.988108 | C | -1.766299 | -0.834417 | 1.049268  |
| O    | 3.567110  | -0.719927 | 2.133490  | C | -2.083303 | -1.591403 | 2.206329  |
| C    | 3.707863  | -1.878879 | 1.770781  | C | -1.897470 | -1.014157 | 3.479373  |
| O    | 4.480748  | -2.819060 | 1.857293  | C | -1.470404 | 0.315588  | 3.611849  |
| O    | 2.372317  | -2.265120 | 0.859395  | H | -1.311024 | 0.739655  | 4.613540  |
| C    | 2.433815  | -3.471563 | 0.115655  | C | -1.239249 | 1.090036  | 2.469662  |
| H    | 3.257039  | -4.091346 | 0.528686  | H | -0.868514 | 2.122298  | 2.598133  |
| H    | 1.476961  | -4.030179 | 0.204991  | C | -1.408358 | 0.528569  | 1.183210  |
| H    | 2.629983  | -3.282964 | -0.961802 | C | -2.044810 | 0.989347  | -1.677797 |
|      |           |           |           | C | -3.448218 | 1.102891  | -1.616286 |
|      |           |           |           | H | -3.930909 | 1.511832  | -0.716420 |
| IM3B |           |           |           | C | -4.230556 | 0.668221  | -2.696442 |
| Ni   | 1.160005  | 1.212817  | -0.574095 | H | -5.327661 | 0.733998  | -2.636293 |
| P    | 1.089931  | -0.946639 | -0.303824 | C | -3.618538 | 0.136028  | -3.845159 |
| P    | -0.957947 | 1.531333  | -0.293715 | H | -4.236890 | -0.212377 | -4.686461 |
| C    | 2.397925  | -1.755217 | -1.324760 | C | -2.217736 | 0.039523  | -3.915070 |
| C    | 2.474489  | -1.376151 | -2.685126 | H | -1.734508 | -0.382883 | -4.809645 |
| H    | 1.751257  | -0.648972 | -3.087102 | C | -1.433690 | 0.468683  | -2.834893 |
| C    | 3.470253  | -1.905710 | -3.518162 | H | -0.336397 | 0.383098  | -2.848967 |
| H    | 3.512040  | -1.606595 | -4.577173 | C | -1.683960 | 3.187824  | 0.074249  |
| C    | 4.422054  | -2.800718 | -2.996366 | C | -2.754830 | 3.345482  | 0.981815  |
| H    | 5.212930  | -3.207060 | -3.645939 | H | -3.120079 | 2.486930  | 1.562693  |
| C    | 4.374486  | -3.151024 | -1.637929 | C | -3.358873 | 4.600870  | 1.155263  |
| H    | 5.135280  | -3.822999 | -1.212118 | H | -4.185982 | 4.709011  | 1.874068  |
| C    | 3.368812  | -2.632360 | -0.804553 | C | -2.910563 | 5.711512  | 0.420998  |
| H    | 3.364271  | -2.890922 | 0.262873  | H | -3.381970 | 6.696439  | 0.563312  |
| C    | 1.317661  | -1.608030 | 1.396998  | C | -1.858401 | 5.557028  | -0.497161 |
| C    | 1.451585  | -0.694532 | 2.461956  | H | -1.501094 | 6.418725  | -1.081979 |
| H    | 1.412247  | 0.391495  | 2.259519  | C | -1.250701 | 4.303877  | -0.669179 |
| C    | 1.607445  | -1.175786 | 3.773161  | H | -0.430420 | 4.196228  | -1.386736 |
| H    | 1.689671  | -0.458759 | 4.604642  | O | -2.631105 | -2.841108 | 2.084347  |
| C    | 1.652835  | -2.556884 | 4.024006  | C | -1.754086 | -3.970030 | 2.092829  |
| H    | 1.775525  | -2.928412 | 5.053370  |   |           |           |           |

|      |           |           |           |   |           |           |           |
|------|-----------|-----------|-----------|---|-----------|-----------|-----------|
| H    | -1.107491 | -3.975650 | 1.190439  | H | -3.553444 | -1.908160 | -1.907829 |
| H    | -2.402881 | -4.866469 | 2.086585  | C | -4.298702 | -1.378357 | -3.881663 |
| H    | -1.116748 | -3.974618 | 3.000493  | H | -5.045352 | -2.187852 | -3.882602 |
| O    | -4.083790 | -1.589601 | -0.269639 | C | -4.188067 | -0.512221 | -4.980444 |
| C    | -5.048229 | -2.545509 | 0.203862  | H | -4.847760 | -0.637203 | -5.853743 |
| H    | -5.925636 | -1.951163 | 0.520128  | C | -3.235969 | 0.526284  | -4.960866 |
| H    | -4.632052 | -3.089301 | 1.074388  | H | -3.152184 | 1.217647  | -5.814236 |
| H    | -5.355802 | -3.254032 | -0.590698 | C | -2.398630 | 0.689922  | -3.848951 |
| Cl   | -2.191544 | -1.989550 | 4.900897  | H | -1.668091 | 1.513914  | -3.829536 |
| Cl   | -4.323877 | -3.181026 | -2.902573 | C | -2.070174 | 1.793949  | -0.920718 |
| C    | 1.535568  | 2.847361  | -1.989929 | C | -1.338558 | 2.952499  | -1.226390 |
| H    | 1.447240  | 3.756191  | -1.360746 | H | -0.337214 | 2.882824  | -1.669135 |
| C    | 2.622553  | 2.060475  | -1.654012 | C | -1.887414 | 4.218810  | -0.958358 |
| C    | 3.177858  | 1.206307  | -0.879250 | H | -1.288555 | 5.119203  | -1.165608 |
| C    | 4.323131  | 0.489636  | -0.392261 | C | -3.183181 | 4.330101  | -0.428289 |
| C    | 4.391295  | 0.112888  | 0.971623  | H | -3.609779 | 5.322453  | -0.214008 |
| H    | 3.581502  | 0.427106  | 1.642854  | C | -3.939215 | 3.169957  | -0.176170 |
| C    | 5.471344  | -0.644793 | 1.440960  | H | -4.957791 | 3.249442  | 0.233082  |
| C    | 6.503613  | -1.025774 | 0.563468  | C | -3.383456 | 1.906333  | -0.411849 |
| H    | 7.349235  | -1.627334 | 0.932241  | H | -3.963664 | 0.997161  | -0.188082 |
| C    | 6.454123  | -0.633182 | -0.787164 | C | 0.256234  | 0.195836  | -1.932733 |
| H    | 7.259147  | -0.930116 | -1.477568 | C | 0.477404  | -0.490044 | -3.150476 |
| C    | 5.373610  | 0.117512  | -1.267694 | H | -0.364473 | -0.946162 | -3.687319 |
| H    | 5.311314  | 0.399672  | -2.328749 | C | 1.762357  | -0.615153 | -3.676721 |
| C    | 0.935924  | 2.883145  | -3.376599 | H | 1.930546  | -1.166905 | -4.612839 |
| H    | 1.101866  | 1.933205  | -3.920637 | C | 2.869438  | -0.058282 | -3.016757 |
| H    | 1.394567  | 3.703051  | -3.973418 | C | 2.690773  | 0.649225  | -1.802715 |
| H    | -0.155977 | 3.072547  | -3.345228 | C | 1.370420  | 0.741192  | -1.246134 |
| H    | 5.506446  | -0.940674 | 2.501059  | C | 1.316081  | 1.403450  | 0.099556  |
| O    | 0.483452  | 3.762338  | 2.690154  | C | 1.496134  | 2.808432  | 0.172487  |
| C    | 1.119554  | 3.392587  | 1.690805  | C | 1.529885  | 3.430988  | 1.441874  |
| O    | 1.428378  | 2.202029  | 1.341898  | C | 1.561311  | 2.663134  | 2.615029  |
| O    | 1.586197  | 4.362733  | 0.785036  | H | 1.624734  | 3.169054  | 3.589212  |
| C    | 1.306927  | 5.713243  | 1.149677  | C | 1.475438  | 1.268537  | 2.533238  |
| H    | 0.224910  | 5.864648  | 1.343084  | H | 1.514720  | 0.677859  | 3.458122  |
| H    | 1.865635  | 6.008658  | 2.063876  | C | 1.305805  | 0.628608  | 1.288914  |
| H    | 1.632858  | 6.342812  | 0.297974  | C | 2.907107  | -1.541080 | 0.559995  |
|      |           |           |           | C | 3.992927  | -0.981158 | 1.269007  |
| IM3C |           |           |           | H | 3.800403  | -0.343924 | 2.146006  |
| Ni   | -1.673807 | -1.461611 | 0.246751  | C | 5.311920  | -1.231090 | 0.863016  |
| P    | -1.463273 | 0.091606  | -1.245526 | H | 6.150597  | -0.794458 | 1.428304  |
| P    | 1.144995  | -1.205904 | 1.076242  | C | 5.563069  | -2.029871 | -0.269010 |
| C    | -2.495830 | -0.198829 | -2.752902 | H | 6.598683  | -2.220481 | -0.592098 |
| C    | -3.454935 | -1.225751 | -2.765293 | C | 4.489113  | -2.576108 | -0.989608 |

|    |           |           |           |      |           |           |           |
|----|-----------|-----------|-----------|------|-----------|-----------|-----------|
| H  | 4.675716  | -3.188839 | -1.884516 | H    | -1.283459 | 4.126575  | 2.385560  |
| C  | 3.167280  | -2.335043 | -0.573701 | O    | -3.722828 | -3.624330 | -0.816435 |
| H  | 2.330624  | -2.754568 | -1.147376 | C    | -2.660064 | -4.140280 | -1.130751 |
| C  | 1.186097  | -1.848267 | 2.803875  | O    | -2.173179 | -5.191150 | -1.494173 |
| C  | 0.276784  | -1.384508 | 3.786428  | O    | -1.458575 | -2.940226 | -1.020013 |
| H  | -0.375230 | -0.527216 | 3.575741  | C    | -0.147887 | -3.399758 | -1.288043 |
| C  | 0.186235  | -2.021781 | 5.034621  | H    | -0.206107 | -4.266095 | -1.977227 |
| H  | -0.526135 | -1.641845 | 5.783735  | H    | 0.434952  | -2.584279 | -1.761407 |
| C  | 0.988187  | -3.139180 | 5.323334  | H    | 0.380935  | -3.724147 | -0.361000 |
| H  | 0.909844  | -3.641585 | 6.300050  |      |           |           |           |
| C  | 1.893410  | -3.608924 | 4.355012  | TS2A |           |           |           |
| H  | 2.529674  | -4.481962 | 4.569877  | Ni   | 1.728687  | -0.533647 | 0.070912  |
| C  | 1.993981  | -2.969667 | 3.109025  | P    | 0.339745  | 0.269968  | 1.683587  |
| H  | 2.703229  | -3.351659 | 2.359055  | P    | 0.240997  | -1.186060 | -1.390513 |
| O  | 1.598984  | 3.489622  | -1.003861 | C    | 0.717588  | -0.322360 | 3.392189  |
| C  | 2.725246  | 4.353764  | -1.211722 | C    | 1.168848  | -1.649662 | 3.559455  |
| H  | 2.993072  | 4.267851  | -2.283080 | H    | 1.380199  | -2.255293 | 2.659695  |
| H  | 3.588434  | 4.034760  | -0.593303 | C    | 1.399075  | -2.153513 | 4.849767  |
| H  | 2.474045  | 5.407130  | -0.974380 | H    | 1.760375  | -3.187011 | 4.972307  |
| O  | 3.635636  | 1.233469  | -1.029923 | C    | 1.188873  | -1.340989 | 5.978351  |
| C  | 4.992163  | 1.466962  | -1.408625 | H    | 1.375310  | -1.737498 | 6.989115  |
| H  | 5.401293  | 2.111864  | -0.607549 | C    | 0.748125  | -0.015853 | 5.812322  |
| H  | 5.061653  | 1.994952  | -2.380695 | H    | 0.585747  | 0.627627  | 6.691613  |
| H  | 5.571276  | 0.525024  | -1.446849 | C    | 0.511230  | 0.494285  | 4.524728  |
| Cl | 1.465310  | 5.179261  | 1.565176  | H    | 0.158863  | 1.529293  | 4.400708  |
| Cl | 4.438622  | -0.365392 | -3.747383 | C    | 0.344031  | 2.086435  | 1.939968  |
| C  | -2.432923 | -2.984572 | 1.766080  | C    | -0.816209 | 2.879298  | 1.874718  |
| H  | -3.394913 | -3.336657 | 1.344715  | H    | -1.796047 | 2.418665  | 1.685378  |
| C  | -2.383724 | -1.658556 | 2.093818  | C    | -0.719943 | 4.273852  | 2.027541  |
| C  | -2.216899 | -0.406732 | 1.787394  | H    | -1.629562 | 4.889988  | 1.950141  |
| C  | -2.490602 | 0.907992  | 2.337364  | C    | 0.525479  | 4.875732  | 2.272355  |
| C  | -1.655966 | 2.018165  | 2.077908  | H    | 0.598179  | 5.968576  | 2.387201  |
| H  | -0.788957 | 1.884364  | 1.427392  | C    | 1.683152  | 4.080125  | 2.363568  |
| C  | -1.948843 | 3.279396  | 2.610250  | H    | 2.662982  | 4.546719  | 2.547870  |
| C  | -3.092532 | 3.459238  | 3.406953  | C    | 1.597280  | 2.693441  | 2.184796  |
| H  | -3.331676 | 4.452864  | 3.817392  | H    | 2.504181  | 2.069198  | 2.221518  |
| C  | -3.937649 | 2.364271  | 3.671673  | C    | -1.451665 | -0.200612 | 1.535672  |
| H  | -4.837609 | 2.498652  | 4.292460  | C    | -2.056830 | -0.911734 | 2.595417  |
| C  | -3.641628 | 1.099307  | 3.145612  | H    | -1.524386 | -1.043892 | 3.545641  |
| H  | -4.304326 | 0.241867  | 3.339753  | C    | -3.314933 | -1.492429 | 2.439769  |
| C  | -1.457623 | -4.063347 | 2.142175  | H    | -3.767165 | -2.076006 | 3.254710  |
| H  | -1.311025 | -4.746134 | 1.279751  | C    | -4.008438 | -1.386444 | 1.224305  |
| H  | -1.877705 | -4.681913 | 2.965823  | C    | -3.467969 | -0.621681 | 0.163208  |
| H  | -0.481318 | -3.665434 | 2.466869  | C    | -2.174490 | -0.029665 | 0.330395  |

|    |           |           |           |      |           |           |           |
|----|-----------|-----------|-----------|------|-----------|-----------|-----------|
| C  | -1.701492 | 0.771263  | -0.847867 | C    | 3.335611  | -0.042239 | -0.938299 |
| C  | -2.352678 | 2.015954  | -1.064043 | C    | 2.498593  | 0.963836  | -0.633171 |
| C  | -2.039543 | 2.776105  | -2.214793 | C    | 2.393060  | 2.389486  | -0.798609 |
| C  | -1.174895 | 2.265563  | -3.193010 | C    | 1.130365  | 3.029048  | -0.862250 |
| H  | -0.962341 | 2.863177  | -4.090931 | H    | 0.230000  | 2.418654  | -0.753969 |
| C  | -0.554121 | 1.027334  | -2.992860 | C    | 1.035498  | 4.410370  | -1.055510 |
| H  | 0.128173  | 0.645496  | -3.763349 | C    | 2.203663  | 5.189064  | -1.148920 |
| C  | -0.775267 | 0.288204  | -1.812635 | H    | 2.131621  | 6.280539  | -1.277608 |
| C  | -1.014203 | -2.456525 | -0.975303 | C    | 3.468157  | 4.570813  | -1.074289 |
| C  | -2.072995 | -2.742291 | -1.864005 | H    | 4.383560  | 5.179676  | -1.144059 |
| H  | -2.137706 | -2.215812 | -2.828645 | C    | 3.567727  | 3.182127  | -0.923474 |
| C  | -3.051267 | -3.680841 | -1.502546 | H    | 4.550799  | 2.689871  | -0.867569 |
| H  | -3.880141 | -3.902051 | -2.193092 | C    | 5.042033  | -1.821166 | -1.643419 |
| C  | -2.980636 | -4.327375 | -0.255014 | H    | 6.143176  | -1.752775 | -1.770303 |
| H  | -3.759352 | -5.049713 | 0.033621  | H    | 4.665342  | -2.435880 | -2.497047 |
| C  | -1.926909 | -4.039992 | 0.629619  | H    | 4.824303  | -2.375417 | -0.712046 |
| H  | -1.877741 | -4.534777 | 1.611656  | H    | 0.042309  | 4.880246  | -1.116133 |
| C  | -0.939708 | -3.109021 | 0.270930  | O    | 3.788259  | -0.620276 | 2.174546  |
| H  | -0.115102 | -2.854003 | 0.954692  | C    | 3.998470  | -1.768754 | 1.945886  |
| C  | 1.049224  | -1.792556 | -2.910612 | O    | 4.568763  | -2.814066 | 1.947086  |
| C  | 1.978320  | -0.964773 | -3.590878 | O    | 2.218106  | -2.271877 | 0.851052  |
| H  | 2.115157  | 0.080712  | -3.285653 | C    | 2.387249  | -3.405830 | 0.046998  |
| C  | 2.746432  | -1.479281 | -4.647317 | H    | 3.151220  | -4.077520 | 0.506630  |
| H  | 3.458727  | -0.820980 | -5.168694 | H    | 1.443872  | -3.999410 | -0.053078 |
| C  | 2.631400  | -2.830064 | -5.016015 | H    | 2.729187  | -3.174146 | -0.989042 |
| H  | 3.247835  | -3.235091 | -5.833631 |      |           |           |           |
| C  | 1.726968  | -3.664077 | -4.331650 | TS2B |           |           |           |
| H  | 1.632773  | -4.724938 | -4.611861 | Ni   | 1.324905  | 0.786577  | -0.611677 |
| C  | 0.942808  | -3.153024 | -3.287732 | P    | 0.815361  | -1.266897 | -0.166719 |
| H  | 0.247447  | -3.815532 | -2.751743 | P    | -0.650492 | 1.644084  | -0.389824 |
| O  | -3.227914 | 2.432034  | -0.106940 | C    | 1.942267  | -2.406489 | -1.075203 |
| C  | -4.563719 | 2.796439  | -0.479617 | C    | 2.149837  | -2.134525 | -2.447796 |
| H  | -4.685750 | 3.898315  | -0.490254 | H    | 1.619889  | -1.295849 | -2.926033 |
| H  | -5.239775 | 2.356986  | 0.281236  | C    | 3.045295  | -2.909403 | -3.197509 |
| H  | -4.825753 | 2.392150  | -1.477991 | H    | 3.194920  | -2.688740 | -4.265837 |
| O  | -4.002848 | -0.415755 | -1.067699 | C    | 3.767792  | -3.946627 | -2.579607 |
| C  | -5.380683 | -0.588470 | -1.394556 | H    | 4.486603  | -4.542357 | -3.163439 |
| H  | -5.518473 | -0.054765 | -2.354918 | C    | 3.591682  | -4.197975 | -1.210905 |
| H  | -6.046213 | -0.144044 | -0.627223 | H    | 4.179340  | -4.982575 | -0.710590 |
| H  | -5.639487 | -1.657141 | -1.528570 | C    | 2.680263  | -3.434074 | -0.460186 |
| Cl | -2.662571 | 4.405775  | -2.391053 | H    | 2.576233  | -3.622445 | 0.616623  |
| Cl | -5.503061 | -2.306153 | 1.097673  | C    | 0.821559  | -1.789066 | 1.591191  |
| C  | 4.411508  | -0.464051 | -1.657415 | C    | 1.071166  | -0.797535 | 2.561421  |
| H  | 4.847075  | 0.276234  | -2.361750 | H    | 1.268266  | 0.236004  | 2.239014  |

|   |           |           |           |      |           |           |           |
|---|-----------|-----------|-----------|------|-----------|-----------|-----------|
| C | 1.046465  | -1.128112 | 3.925186  | C    | -0.016077 | 4.386764  | -0.384542 |
| H | 1.221479  | -0.343598 | 4.677113  | H    | 0.954726  | 4.033547  | -0.768080 |
| C | 0.798516  | -2.451934 | 4.325542  | O    | -3.322713 | -2.169213 | 2.074967  |
| H | 0.779243  | -2.710535 | 5.395476  | C    | -2.680030 | -3.444860 | 2.140462  |
| C | 0.571399  | -3.447580 | 3.357916  | H    | -2.002788 | -3.594601 | 1.273691  |
| H | 0.382691  | -4.486889 | 3.669756  | H    | -3.488576 | -4.199395 | 2.109542  |
| C | 0.568695  | -3.116888 | 1.993155  | H    | -2.103392 | -3.551393 | 3.081737  |
| H | 0.359313  | -3.891354 | 1.239306  | O    | -4.366723 | -0.729065 | -0.420370 |
| C | -0.861664 | -1.795219 | -0.798518 | C    | -5.535097 | -1.431857 | 0.038369  |
| C | -0.964161 | -2.645769 | -1.917738 | H    | -6.273572 | -0.648644 | 0.291795  |
| H | -0.068675 | -3.129108 | -2.329608 | H    | -5.283321 | -2.015665 | 0.945480  |
| C | -2.196616 | -2.858692 | -2.548058 | H    | -5.957569 | -2.090444 | -0.746399 |
| H | -2.264532 | -3.488087 | -3.447231 | Cl   | -2.917448 | -1.231941 | 4.861665  |
| C | -3.349449 | -2.221640 | -2.070926 | Cl   | -4.824292 | -2.342535 | -3.005461 |
| C | -3.303310 | -1.429847 | -0.897465 | C    | 2.164503  | 2.461202  | -1.767492 |
| C | -2.050547 | -1.230224 | -0.261628 | H    | 2.807155  | 3.445573  | -0.537652 |
| C | -2.020166 | -0.435698 | 1.001133  | C    | 2.966563  | 1.406719  | -1.501416 |
| C | -2.554387 | -1.040338 | 2.167753  | C    | 3.276592  | 0.388075  | -0.745799 |
| C | -2.363959 | -0.417308 | 3.418918  | C    | 4.257555  | -0.556123 | -0.300123 |
| C | -1.743968 | 0.838389  | 3.508948  | C    | 4.245252  | -1.051743 | 1.031806  |
| H | -1.613358 | 1.311117  | 4.492780  | H    | 3.485756  | -0.673326 | 1.729140  |
| C | -1.304616 | 1.473145  | 2.342752  | C    | 5.182413  | -2.002065 | 1.454974  |
| H | -0.834375 | 2.462351  | 2.418518  | C    | 6.165876  | -2.476040 | 0.567203  |
| C | -1.434411 | 0.849612  | 1.081976  | H    | 6.901679  | -3.225207 | 0.899090  |
| C | -1.731664 | 1.279984  | -1.838568 | C    | 6.203975  | -1.978489 | -0.749774 |
| C | -3.095079 | 1.629450  | -1.908429 | H    | 6.968321  | -2.344476 | -1.453985 |
| H | -3.582332 | 2.142547  | -1.068283 | C    | 5.263030  | -1.037360 | -1.183819 |
| C | -3.846984 | 1.290943  | -3.043385 | H    | 5.273288  | -0.671606 | -2.221413 |
| H | -4.917452 | 1.543975  | -3.082360 | C    | 1.622636  | 2.841299  | -3.119747 |
| C | -3.243698 | 0.613386  | -4.117525 | H    | 1.407786  | 1.982308  | -3.795563 |
| H | -3.841180 | 0.339800  | -5.000576 | H    | 2.365666  | 3.491754  | -3.634826 |
| C | -1.880628 | 0.275978  | -4.057938 | H    | 0.693834  | 3.442714  | -3.030434 |
| H | -1.403159 | -0.258611 | -4.893609 | H    | 5.146690  | -2.373633 | 2.491573  |
| C | -1.128029 | 0.612054  | -2.923729 | O    | 1.843378  | 4.731370  | 2.437264  |
| H | -0.061799 | 0.344679  | -2.843184 | C    | 1.898729  | 3.630612  | 2.010047  |
| C | -0.987739 | 3.425090  | -0.052108 | O    | 1.757800  | 2.462252  | 1.855422  |
| C | -2.222157 | 3.845472  | 0.497388  | O    | 3.228529  | 3.990828  | 0.254313  |
| H | -2.978803 | 3.105001  | 0.797944  | C    | 3.420192  | 5.324499  | -0.154465 |
| C | -2.476534 | 5.210948  | 0.694381  | H    | 3.076310  | 6.017114  | 0.647370  |
| H | -3.438795 | 5.528842  | 1.125612  | H    | 4.495095  | 5.547648  | -0.357953 |
| C | -1.502725 | 6.168569  | 0.354403  | H    | 2.847369  | 5.567044  | -1.082105 |
| H | -1.702052 | 7.239178  | 0.518658  |      |           |           |           |
| C | -0.272335 | 5.752865  | -0.178452 | TS2C |           |           |           |
| H | 0.503810  | 6.492642  | -0.426621 | Ni   | -1.719263 | -1.283848 | 0.465201  |



|   |           |           |           |    |           |           |           |
|---|-----------|-----------|-----------|----|-----------|-----------|-----------|
| P | -1.438398 | 0.033675  | -1.232286 | H  | 6.079655  | -0.984152 | 1.497654  |
| P | 1.053815  | -1.107609 | 1.233631  | C  | 5.390368  | -2.436163 | 0.024961  |
| C | -2.540272 | -0.402090 | -2.650256 | H  | 6.406922  | -2.743747 | -0.267167 |
| C | -3.593429 | -1.310540 | -2.449616 | C  | 4.272985  | -3.020477 | -0.592375 |
| H | -3.697783 | -1.814808 | -1.480924 | H  | 4.406811  | -3.781567 | -1.376064 |
| C | -4.506222 | -1.567989 | -3.487967 | C  | 2.975304  | -2.628963 | -0.216882 |
| H | -5.326495 | -2.283272 | -3.319681 | H  | 2.104182  | -3.079957 | -0.709972 |
| C | -4.368516 | -0.921716 | -4.727081 | C  | 1.071074  | -1.500726 | 3.035183  |
| H | -5.081005 | -1.127672 | -5.541546 | C  | 0.208606  | -0.840321 | 3.944863  |
| C | -3.321573 | -0.000257 | -4.924720 | H  | -0.386453 | 0.021468  | 3.616821  |
| H | -3.216616 | 0.519624  | -5.890101 | C  | 0.091018  | -1.285901 | 5.271553  |
| C | -2.415567 | 0.267736  | -3.888227 | H  | -0.583631 | -0.754213 | 5.960943  |
| H | -1.611003 | 1.004641  | -4.039382 | C  | 0.817837  | -2.404220 | 5.714277  |
| C | -1.918759 | 1.806516  | -1.160537 | H  | 0.718315  | -2.755923 | 6.753042  |
| C | -1.113552 | 2.853476  | -1.636778 | C  | 1.675715  | -3.068686 | 4.819495  |
| H | -0.129532 | 2.647638  | -2.076188 | H  | 2.253523  | -3.944622 | 5.154485  |
| C | -1.563127 | 4.182440  | -1.543350 | C  | 1.803712  | -2.621152 | 3.494981  |
| H | -0.905217 | 4.997784  | -1.882093 | H  | 2.475025  | -3.154211 | 2.804682  |
| C | -2.835540 | 4.463587  | -1.019289 | O  | 1.854060  | 3.197952  | -1.492636 |
| H | -3.184381 | 5.505287  | -0.942304 | C  | 3.043316  | 3.932494  | -1.814101 |
| C | -3.667354 | 3.409678  | -0.597050 | H  | 3.285262  | 3.691170  | -2.867664 |
| H | -4.667969 | 3.621453  | -0.190286 | H  | 3.887249  | 3.621918  | -1.165469 |
| C | -3.208592 | 2.087817  | -0.657089 | H  | 2.884275  | 5.024794  | -1.710154 |
| H | -3.846852 | 1.265022  | -0.297883 | O  | 3.721156  | 0.809358  | -1.198295 |
| C | 0.263506  | -0.083832 | -1.949089 | C  | 5.080420  | 0.902992  | -1.622981 |
| C | 0.418248  | -0.949884 | -3.056469 | H  | 5.542719  | 1.634202  | -0.932340 |
| H | -0.461690 | -1.416710 | -3.517736 | H  | 5.160555  | 1.275319  | -2.664031 |
| C | 1.685129  | -1.248283 | -3.556459 | H  | 5.604687  | -0.066725 | -1.527694 |
| H | 1.802753  | -1.941868 | -4.401546 | Cl | 1.852127  | 5.240209  | 0.808590  |
| C | 2.837630  | -0.692309 | -2.978279 | Cl | 4.373449  | -1.229759 | -3.645170 |
| C | 2.725514  | 0.195272  | -1.880069 | C  | -2.586391 | -2.529541 | 2.038016  |
| C | 1.422131  | 0.466692  | -1.344851 | H  | -3.555459 | -2.872945 | 1.627866  |
| C | 1.425669  | 1.314485  | -0.106069 | C  | -2.492013 | -1.179435 | 2.280278  |
| C | 1.707247  | 2.698814  | -0.232074 | C  | -2.218505 | 0.016581  | 1.859508  |
| C | 1.791015  | 3.491731  | 0.935912  | C  | -2.381362 | 1.405451  | 2.240551  |
| C | 1.771036  | 2.898827  | 2.206537  | C  | -1.485385 | 2.408830  | 1.806400  |
| H | 1.874920  | 3.532232  | 3.099280  | H  | -0.658107 | 2.128441  | 1.150361  |
| C | 1.581217  | 1.517086  | 2.323177  | C  | -1.667729 | 3.746981  | 2.175577  |
| H | 1.578369  | 1.062958  | 3.323016  | C  | -2.759453 | 4.113403  | 2.981028  |
| C | 1.360263  | 0.720245  | 1.181858  | H  | -2.911527 | 5.166975  | 3.263654  |
| C | 2.782639  | -1.644501 | 0.771533  | C  | -3.663951 | 3.126889  | 3.420205  |
| C | 3.912533  | -1.051181 | 1.377124  | H  | -4.523234 | 3.406810  | 4.050123  |
| H | 3.774782  | -0.268393 | 2.138945  | C  | -3.478429 | 1.785769  | 3.058080  |
| C | 5.206913  | -1.450369 | 1.013205  | H  | -4.187349 | 1.012028  | 3.391177  |

|      |           |           |           |   |           |           |           |
|------|-----------|-----------|-----------|---|-----------|-----------|-----------|
| C    | -1.709142 | -3.615030 | 2.599289  | H | -3.755089 | -1.726446 | 3.457868  |
| H    | -1.519231 | -4.376124 | 1.814252  | C | -4.034528 | -1.132670 | 1.403299  |
| H    | -2.226676 | -4.136256 | 3.434565  | C | -3.493112 | -0.458272 | 0.282539  |
| H    | -0.742490 | -3.233486 | 2.970558  | C | -2.169998 | 0.083873  | 0.379331  |
| H    | -0.956487 | 4.506083  | 1.816525  | C | -1.694853 | 0.785510  | -0.860859 |
| O    | -4.135579 | -3.643458 | -0.386755 | C | -2.294889 | 2.041555  | -1.145010 |
| C    | -3.186622 | -4.277028 | -0.744447 | C | -1.971773 | 2.713918  | -2.346428 |
| O    | -2.607112 | -5.242280 | -1.131391 | C | -1.156307 | 2.103046  | -3.309177 |
| O    | -1.659800 | -2.853532 | -0.653779 | H | -0.937104 | 2.632791  | -4.247219 |
| C    | -0.409922 | -3.457705 | -0.805680 | C | -0.592823 | 0.849416  | -3.044965 |
| H    | -0.524057 | -4.397990 | -1.391342 | H | 0.050223  | 0.385634  | -3.804212 |
| H    | 0.300728  | -2.799101 | -1.356197 | C | -0.818376 | 0.197998  | -1.815037 |
| H    | 0.076186  | -3.730287 | 0.167873  | C | -1.166882 | -2.475215 | -0.804315 |
|      |           |           |           | C | -2.259683 | -2.757592 | -1.652320 |
|      |           |           |           | H | -2.322076 | -2.285468 | -2.644996 |
| IM4A |           |           |           | C | -3.271450 | -3.626415 | -1.216133 |
| Ni   | 1.667566  | -0.645687 | 0.077523  | H | -4.124367 | -3.850224 | -1.876115 |
| P    | 0.385779  | 0.370981  | 1.652360  | C | -3.200897 | -4.203114 | 0.065528  |
| P    | 0.136167  | -1.294422 | -1.322459 | H | -4.005832 | -4.869044 | 0.412401  |
| C    | 0.789295  | -0.084449 | 3.399227  | C | -2.111049 | -3.920643 | 0.906744  |
| C    | 1.255831  | -1.389933 | 3.667776  | H | -2.059713 | -4.364429 | 1.912882  |
| H    | 1.440657  | -2.071106 | 2.814090  | C | -1.087829 | -3.062282 | 0.473930  |
| C    | 1.518044  | -1.778087 | 4.992482  | H | -0.223922 | -2.814010 | 1.113506  |
| H    | 1.888418  | -2.795728 | 5.196162  | C | 0.886384  | -2.035323 | -2.811353 |
| C    | 1.323865  | -0.874378 | 6.052307  | C | 1.835357  | -1.298339 | -3.564567 |
| H    | 1.534545  | -1.181797 | 7.089110  | H | 2.023002  | -0.241458 | -3.334229 |
| C    | 0.865446  | 0.428067  | 5.783858  | C | 2.554560  | -1.917211 | -4.599382 |
| H    | 0.714000  | 1.142609  | 6.608587  | H | 3.281876  | -1.328383 | -5.179816 |
| C    | 0.597435  | 0.824200  | 4.463013  | C | 2.372966  | -3.283431 | -4.871368 |
| H    | 0.233417  | 1.842414  | 4.259026  | H | 2.951476  | -3.769928 | -5.672149 |
| C    | 0.463877  | 2.200801  | 1.764740  | C | 1.451057  | -4.028423 | -4.111364 |
| C    | -0.663912 | 3.033613  | 1.652145  | H | 1.305470  | -5.100896 | -4.315007 |
| H    | -1.664931 | 2.601491  | 1.515058  | C | 0.714173  | -3.412848 | -3.089882 |
| C    | -0.509613 | 4.430805  | 1.693548  | H | 0.003743  | -4.005234 | -2.494836 |
| H    | -1.395222 | 5.075196  | 1.577522  | O | -3.137443 | 2.557448  | -0.206541 |
| C    | 0.762028  | 4.998320  | 1.877353  | C | -4.474499 | 2.911845  | -0.586155 |
| H    | 0.880367  | 6.092873  | 1.905132  | H | -4.572958 | 4.008570  | -0.716490 |
| C    | 1.887500  | 4.164867  | 2.019906  | H | -5.139485 | 2.574388  | 0.233948  |
| H    | 2.887688  | 4.603515  | 2.157744  | H | -4.769943 | 2.403973  | -1.526233 |
| C    | 1.743377  | 2.773369  | 1.950277  | O | -4.052206 | -0.281985 | -0.942016 |
| H    | 2.624907  | 2.117672  | 2.028672  | C | -5.409635 | -0.560925 | -1.277302 |
| C    | -1.421594 | -0.043589 | 1.574498  | H | -5.544476 | -0.138477 | -2.291701 |
| C    | -2.018654 | -0.675701 | 2.687214  | H | -6.117712 | -0.073310 | -0.577612 |
| H    | -1.461337 | -0.779789 | 3.626737  | H | -5.609983 | -1.649926 | -1.303173 |
| C    | -3.303489 | -1.208953 | 2.599121  |   |           |           |           |

|      |           |           |           |   |           |           |           |
|------|-----------|-----------|-----------|---|-----------|-----------|-----------|
| Cl   | -2.525117 | 4.356986  | -2.608423 | H | 2.379119  | -3.729608 | 0.748852  |
| Cl   | -5.587135 | -1.963278 | 1.395851  | C | 0.732578  | -1.753184 | 1.647520  |
| C    | 4.314112  | -0.842433 | -1.728360 | C | 1.043337  | -0.724257 | 2.559643  |
| H    | 4.725225  | -0.185742 | -2.524676 | H | 1.291070  | 0.277761  | 2.177217  |
| C    | 3.296496  | -0.320590 | -0.989304 | C | 1.015758  | -0.977067 | 3.939665  |
| C    | 2.518772  | 0.747432  | -0.740535 | H | 1.239687  | -0.162609 | 4.645288  |
| C    | 2.499405  | 2.164461  | -0.997071 | C | 0.702977  | -2.262155 | 4.414220  |
| C    | 1.275219  | 2.870984  | -1.101230 | H | 0.680931  | -2.460296 | 5.496915  |
| H    | 0.341440  | 2.324669  | -0.942430 | C | 0.415254  | -3.296415 | 3.504994  |
| C    | 1.258464  | 4.237718  | -1.395737 | H | 0.177038  | -4.305773 | 3.875730  |
| C    | 2.468426  | 4.938575  | -1.552181 | C | 0.416619  | -3.042155 | 2.123884  |
| H    | 2.458294  | 6.019913  | -1.761229 | H | 0.161822  | -3.845208 | 1.415426  |
| C    | 3.695508  | 4.254511  | -1.437535 | C | -0.963693 | -1.790937 | -0.742018 |
| H    | 4.644017  | 4.802146  | -1.556645 | C | -1.109753 | -2.672706 | -1.832061 |
| C    | 3.716011  | 2.877062  | -1.184795 | H | -0.239785 | -3.213098 | -2.227355 |
| H    | 4.669491  | 2.333326  | -1.099226 | C | -2.352143 | -2.846195 | -2.454863 |
| C    | 4.902353  | -2.215385 | -1.632872 | H | -2.452155 | -3.501338 | -3.332378 |
| H    | 6.001408  | -2.194346 | -1.794690 | C | -3.471836 | -2.138830 | -1.998399 |
| H    | 4.481885  | -2.876895 | -2.429200 | C | -3.385015 | -1.311849 | -0.851847 |
| H    | 4.693344  | -2.692631 | -0.657644 | C | -2.122529 | -1.150495 | -0.224556 |
| H    | 0.293300  | 4.758769  | -1.485719 | C | -2.050863 | -0.313746 | 1.008795  |
| O    | 3.914353  | -0.448036 | 2.198005  | C | -2.609427 | -0.850342 | 2.197140  |
| C    | 4.205815  | -1.582798 | 2.078980  | C | -2.388896 | -0.190955 | 3.424552  |
| O    | 4.650555  | -2.673468 | 2.036359  | C | -1.712178 | 1.037511  | 3.468065  |
| O    | 1.980912  | -2.336142 | 0.992945  | H | -1.557395 | 1.539041  | 4.433984  |
| C    | 2.182871  | -3.509974 | 0.266799  | C | -1.246044 | 1.607714  | 2.279223  |
| H    | 2.908843  | -4.172835 | 0.801393  | H | -0.724839 | 2.573097  | 2.317920  |
| H    | 1.241808  | -4.108579 | 0.132642  | C | -1.405852 | 0.944919  | 1.042315  |
| H    | 2.590356  | -3.345825 | -0.758971 | C | -1.683976 | 1.291543  | -1.889942 |
|      |           |           |           | C | -3.033018 | 1.691819  | -1.967577 |
| IM4B |           |           |           | H | -3.498581 | 2.246128  | -1.141694 |
| Ni   | 1.344278  | 0.684232  | -0.662875 | C | -3.801703 | 1.349153  | -3.089979 |
| P    | 0.739236  | -1.322186 | -0.134017 | H | -4.861595 | 1.642578  | -3.133654 |
| P    | -0.582060 | 1.648436  | -0.454630 | C | -3.229919 | 0.614980  | -4.143905 |
| C    | 1.805201  | -2.554288 | -0.992417 | H | -3.841200 | 0.337558  | -5.016247 |
| C    | 2.024749  | -2.349213 | -2.374705 | C | -1.881259 | 0.225461  | -4.076931 |
| H    | 1.536309  | -1.505692 | -2.887200 | H | -1.428376 | -0.353508 | -4.896574 |
| C    | 2.881811  | -3.196114 | -3.090472 | C | -1.111765 | 0.566465  | -2.955550 |
| H    | 3.042091  | -3.026584 | -4.166551 | H | -0.056294 | 0.260051  | -2.870708 |
| C    | 3.554067  | -4.240377 | -2.429130 | C | -0.815321 | 3.453763  | -0.161144 |
| H    | 4.244042  | -4.892772 | -2.986576 | C | -2.037831 | 3.960782  | 0.339522  |
| C    | 3.365817  | -4.427400 | -1.051864 | H | -2.854107 | 3.275771  | 0.614156  |
| H    | 3.915138  | -5.218306 | -0.518993 | C | -2.203581 | 5.340966  | 0.527764  |
| C    | 2.492182  | -3.590494 | -0.334536 | H | -3.157735 | 5.726554  | 0.920056  |

|    |           |           |           |      |           |           |           |
|----|-----------|-----------|-----------|------|-----------|-----------|-----------|
| C  | -1.150744 | 6.226784  | 0.231015  | H    | 3.109053  | 5.429274  | -1.219716 |
| H  | -1.280167 | 7.308951  | 0.389597  |      |           |           |           |
| C  | 0.068609  | 5.724226  | -0.250093 | IM4C |           |           |           |
| H  | 0.905813  | 6.406765  | -0.461378 | Ni   | -1.324720 | -0.927721 | 1.010302  |
| C  | 0.235723  | 4.343164  | -0.450377 | P    | -1.387989 | -0.396662 | -1.083513 |
| H  | 1.194924  | 3.922901  | -0.795412 | P    | 0.986896  | -0.378327 | 1.585604  |
| O  | -3.427994 | -1.946247 | 2.147381  | C    | -2.696017 | -1.364722 | -1.944564 |
| C  | -2.842058 | -3.246673 | 2.248144  | C    | -3.823811 | -1.744188 | -1.191159 |
| H  | -2.174538 | -3.450872 | 1.384975  | H    | -3.817110 | -1.573519 | -0.104258 |
| H  | -3.683222 | -3.965265 | 2.239779  | C    | -4.927867 | -2.339364 | -1.822699 |
| H  | -2.268679 | -3.351755 | 3.191603  | H    | -5.803918 | -2.634986 | -1.224309 |
| O  | -4.413816 | -0.547300 | -0.397210 | C    | -4.906077 | -2.569413 | -3.209416 |
| C  | -5.610111 | -1.181104 | 0.089463  | H    | -5.766910 | -3.045902 | -3.704204 |
| H  | -6.313004 | -0.357722 | 0.315230  | C    | -3.786080 | -2.180179 | -3.965964 |
| H  | -5.380704 | -1.741696 | 1.016921  | H    | -3.770462 | -2.346001 | -5.054754 |
| H  | -6.063671 | -1.849086 | -0.669647 | C    | -2.690050 | -1.563590 | -3.340360 |
| Cl | -2.975257 | -0.926709 | 4.896329  | H    | -1.832459 | -1.227250 | -3.943707 |
| Cl | -4.953531 | -2.219272 | -2.926250 | C    | -1.838004 | 1.230204  | -1.817505 |
| C  | 2.254076  | 2.281909  | -1.864758 | C    | -1.032450 | 1.929488  | -2.732311 |
| H  | 3.021862  | 3.277687  | -0.644485 | H    | -0.081738 | 1.504481  | -3.077531 |
| C  | 3.006624  | 1.201021  | -1.574994 | C    | -1.442193 | 3.184699  | -3.216046 |
| C  | 3.272636  | 0.189301  | -0.789586 | H    | -0.783439 | 3.737180  | -3.903994 |
| C  | 4.213625  | -0.782045 | -0.318914 | C    | -2.678379 | 3.725173  | -2.824387 |
| C  | 4.186534  | -1.238259 | 1.027425  | H    | -2.996681 | 4.709703  | -3.201786 |
| H  | 3.445818  | -0.809119 | 1.715503  | C    | -3.515117 | 2.998349  | -1.956848 |
| C  | 5.085665  | -2.212818 | 1.476684  | H    | -4.489870 | 3.409079  | -1.651917 |
| C  | 6.046010  | -2.753127 | 0.601536  | C    | -3.095124 | 1.762365  | -1.449550 |
| H  | 6.752062  | -3.521271 | 0.954012  | H    | -3.741963 | 1.209359  | -0.751058 |
| C  | 6.099404  | -2.296514 | -0.729819 | C    | 0.237095  | -0.923702 | -1.755911 |
| H  | 6.845764  | -2.714034 | -1.424678 | C    | 0.326666  | -2.208703 | -2.333791 |
| C  | 5.196232  | -1.331157 | -1.189719 | H    | -0.581981 | -2.798060 | -2.511394 |
| H  | 5.218494  | -0.997078 | -2.237815 | C    | 1.574258  | -2.769262 | -2.611031 |
| C  | 1.718037  | 2.678328  | -3.212246 | H    | 1.650260  | -3.785424 | -3.024383 |
| H  | 1.444502  | 1.827448  | -3.877494 | C    | 2.759724  | -2.067102 | -2.335332 |
| H  | 2.490512  | 3.280005  | -3.743014 | C    | 2.707164  | -0.761793 | -1.786407 |
| H  | 0.827475  | 3.334300  | -3.116444 | C    | 1.427704  | -0.212115 | -1.456018 |
| H  | 5.038323  | -2.551305 | 2.524155  | C    | 1.461039  | 1.110450  | -0.744646 |
| O  | 2.242582  | 4.863889  | 2.336192  | C    | 1.778039  | 2.271513  | -1.495151 |
| C  | 2.117476  | 3.732901  | 2.028706  | C    | 1.841722  | 3.521888  | -0.838127 |
| O  | 1.853784  | 2.584364  | 1.932320  | C    | 1.769369  | 3.598960  | 0.560308  |
| O  | 3.473787  | 3.830986  | 0.103947  | H    | 1.862112  | 4.577368  | 1.053537  |
| C  | 3.808197  | 5.095931  | -0.413522 | C    | 1.548009  | 2.435829  | 1.306178  |
| H  | 3.760183  | 5.850606  | 0.402768  | H    | 1.502577  | 2.506027  | 2.401126  |
| H  | 4.841158  | 5.124787  | -0.840389 | C    | 1.340810  | 1.196289  | 0.667825  |

|    |           |           |           |     |           |           |           |
|----|-----------|-----------|-----------|-----|-----------|-----------|-----------|
| C  | 2.722819  | -1.073551 | 1.443940  | C   | -3.773105 | 4.068440  | 2.193940  |
| C  | 3.835055  | -0.233724 | 1.680241  | H   | -4.628733 | 4.535346  | 2.707335  |
| H  | 3.676134  | 0.820213  | 1.954555  | C   | -3.553531 | 2.691190  | 2.328586  |
| C  | 5.141653  | -0.729371 | 1.566189  | H   | -4.228079 | 2.073463  | 2.941549  |
| H  | 5.997095  | -0.062342 | 1.758774  | C   | -1.495296 | -2.246742 | 3.962137  |
| C  | 5.359448  | -2.069469 | 1.194769  | H   | -0.909128 | -3.123083 | 3.612562  |
| H  | 6.385837  | -2.456552 | 1.093765  | H   | -2.139883 | -2.606492 | 4.794781  |
| C  | 4.261099  | -2.907860 | 0.948679  | H   | -0.797694 | -1.488031 | 4.358952  |
| H  | 4.418080  | -3.954374 | 0.645696  | H   | -1.136215 | 4.849001  | 0.131427  |
| C  | 2.950975  | -2.412830 | 1.080589  | O   | -3.913968 | -4.099268 | 0.952384  |
| H  | 2.095945  | -3.068934 | 0.877870  | C   | -3.312118 | -4.448788 | 0.001263  |
| C  | 1.019038  | 0.116449  | 3.362545  | O   | -2.795046 | -4.907228 | -0.949335 |
| C  | 0.147658  | 1.113155  | 3.866423  | O   | -1.336198 | -2.711426 | 0.292211  |
| H  | -0.457569 | 1.719569  | 3.180953  | C   | -0.299140 | -3.575716 | 0.604267  |
| C  | 0.040129  | 1.339119  | 5.248401  | H   | -0.611770 | -4.636227 | 0.430424  |
| H  | -0.641756 | 2.123047  | 5.614055  | H   | 0.603048  | -3.419286 | -0.042442 |
| C  | 0.786915  | 0.569291  | 6.156357  | H   | 0.046879  | -3.513108 | 1.670804  |
| H  | 0.695828  | 0.743416  | 7.239920  |     |           |           |           |
| C  | 1.655071  | -0.424135 | 5.667295  | IM5 |           |           |           |
| H  | 2.249636  | -1.032520 | 6.367201  | Ni  | -1.423651 | 1.071736  | -0.636181 |
| C  | 1.772476  | -0.646834 | 4.286603  | P   | -1.034341 | -0.710646 | 0.533467  |
| H  | 2.451042  | -1.431868 | 3.920554  | P   | 0.717585  | 1.582856  | -0.870880 |
| O  | 1.962193  | 2.118270  | -2.838382 | C   | -2.407357 | -1.260803 | 1.624343  |
| C  | 3.177697  | 2.597065  | -3.428762 | C   | -2.825074 | -0.397439 | 2.663909  |
| H  | 3.427853  | 1.893281  | -4.246749 | H   | -2.284485 | 0.542853  | 2.846908  |
| H  | 4.002303  | 2.601961  | -2.687328 | C   | -3.949842 | -0.714101 | 3.439165  |
| H  | 3.052552  | 3.618265  | -3.842412 | H   | -4.264192 | -0.033442 | 4.245664  |
| O  | 3.743596  | 0.046971  | -1.456677 | C   | -4.688226 | -1.879939 | 3.168145  |
| C  | 5.079975  | -0.105341 | -1.931198 | H   | -5.582456 | -2.117651 | 3.765199  |
| H  | 5.579633  | 0.853398  | -1.692443 | C   | -4.296978 | -2.724690 | 2.117555  |
| H  | 5.109893  | -0.274168 | -3.026820 | H   | -4.885409 | -3.624173 | 1.880418  |
| H  | 5.606879  | -0.927436 | -1.410262 | C   | -3.162959 | -2.417224 | 1.347085  |
| Cl | 1.946135  | 5.003031  | -1.771569 | H   | -2.881499 | -3.070085 | 0.509115  |
| Cl | 4.262088  | -2.939807 | -2.614640 | C   | -0.750129 | -2.118450 | -0.614584 |
| C  | -2.341010 | -1.714016 | 2.834695  | C   | -0.865251 | -1.907185 | -2.002002 |
| H  | -3.083700 | -2.419445 | 2.414308  | H   | -1.114077 | -0.899584 | -2.369947 |
| C  | -2.506035 | -0.381401 | 2.538493  | C   | -0.618848 | -2.959313 | -2.896784 |
| C  | -2.217651 | 0.651556  | 1.808862  | H   | -0.693003 | -2.782325 | -3.980675 |
| C  | -2.459302 | 2.070093  | 1.668595  | C   | -0.260981 | -4.227429 | -2.408683 |
| C  | -1.604157 | 2.874465  | 0.878687  | H   | -0.058405 | -5.050316 | -3.110950 |
| H  | -0.779593 | 2.396634  | 0.342467  | C   | -0.141596 | -4.440477 | -1.023203 |
| C  | -1.817686 | 4.253086  | 0.757868  | H   | 0.152767  | -5.430094 | -0.640308 |
| C  | -2.905539 | 4.856943  | 1.410774  | C   | -0.380118 | -3.389329 | -0.125400 |
| H  | -3.083990 | 5.938978  | 1.309291  | H   | -0.258496 | -3.546227 | 0.957253  |

|   |           |           |           |      |           |           |           |
|---|-----------|-----------|-----------|------|-----------|-----------|-----------|
| C | 0.471512  | -0.783042 | 1.610850  | C    | 5.207535  | -1.315275 | 1.607663  |
| C | 0.359185  | -0.714320 | 3.014927  | H    | 5.897388  | -0.747327 | 2.264064  |
| H | -0.625922 | -0.782975 | 3.494167  | H    | 5.745096  | -1.624845 | 0.689124  |
| C | 1.488512  | -0.530188 | 3.817774  | H    | 4.857870  | -2.219499 | 2.146763  |
| H | 1.394015  | -0.427918 | 4.908520  | Cl   | 3.167018  | -3.911377 | -2.973636 |
| C | 2.756374  | -0.428886 | 3.227177  | Cl   | 4.124021  | 0.001771  | 4.233915  |
| C | 2.912901  | -0.592227 | 1.832450  | C    | -2.962537 | 3.255251  | 1.538015  |
| C | 1.761157  | -0.758010 | 1.019511  | H    | -2.749426 | 3.123912  | 2.620027  |
| C | 1.994274  | -0.906181 | -0.452511 | C    | -3.168374 | 2.168357  | 0.788936  |
| C | 2.522568  | -2.157222 | -0.896278 | C    | -3.237304 | 1.130630  | -0.005897 |
| C | 2.696543  | -2.362605 | -2.285806 | C    | -4.331500 | 0.226348  | -0.343869 |
| C | 2.412305  | -1.331632 | -3.199234 | C    | -4.189585 | -0.701820 | -1.402111 |
| H | 2.557017  | -1.525572 | -4.271855 | H    | -3.265957 | -0.674155 | -1.996319 |
| C | 1.916180  | -0.105661 | -2.757106 | C    | -5.189233 | -1.645974 | -1.673813 |
| H | 1.665216  | 0.673218  | -3.491619 | C    | -6.356744 | -1.682111 | -0.890291 |
| C | 1.699807  | 0.119182  | -1.379181 | H    | -7.138845 | -2.431052 | -1.092420 |
| C | 1.450715  | 2.185406  | 0.711214  | C    | -6.518827 | -0.753195 | 0.155888  |
| C | 2.840896  | 2.372246  | 0.856854  | H    | -7.428900 | -0.777385 | 0.776720  |
| H | 3.523306  | 2.109915  | 0.035301  | C    | -5.520862 | 0.191582  | 0.425864  |
| C | 3.360809  | 2.847615  | 2.068841  | H    | -5.632052 | 0.902134  | 1.259363  |
| H | 4.448776  | 2.965169  | 2.187353  | C    | -2.971104 | 4.672921  | 1.017554  |
| C | 2.496636  | 3.151996  | 3.136969  | H    | -3.223762 | 4.697191  | -0.060373 |
| H | 2.909042  | 3.514374  | 4.091391  | H    | -1.971034 | 5.144231  | 1.147917  |
| C | 1.110303  | 2.982634  | 2.986895  | H    | -3.698360 | 5.309150  | 1.569018  |
| H | 0.429212  | 3.219688  | 3.819349  | H    | -5.051295 | -2.364780 | -2.497240 |
| C | 0.585943  | 2.499816  | 1.776235  | O    | -2.067087 | 2.123390  | -2.070749 |
| H | -0.499482 | 2.355976  | 1.645693  | C    | -1.697227 | 1.602611  | -3.302790 |
| C | 1.227707  | 2.938674  | -2.002805 | H    | -0.589280 | 1.426337  | -3.421582 |
| C | 2.537766  | 3.053477  | -2.518765 | H    | -2.192734 | 0.623904  | -3.555489 |
| H | 3.279036  | 2.260376  | -2.336097 | H    | -1.982197 | 2.311618  | -4.121828 |
| C | 2.898673  | 4.181402  | -3.272534 |      |           |           |           |
| H | 3.921259  | 4.265428  | -3.673285 | IM6A |           |           |           |
| C | 1.959418  | 5.201702  | -3.511533 | Ni   | 0.579174  | -0.728705 | 0.173070  |
| H | 2.246435  | 6.086304  | -4.101904 | P    | -0.460270 | 0.877293  | 1.146615  |
| C | 0.655697  | 5.087625  | -2.998656 | P    | -1.131069 | -1.345516 | -1.103169 |
| H | -0.084919 | 5.879717  | -3.192200 | C    | 0.275811  | 1.536660  | 2.703591  |
| C | 0.285201  | 3.962657  | -2.242861 | C    | 0.522854  | 0.651423  | 3.778848  |
| H | -0.746132 | 3.822222  | -1.878618 | H    | 0.205430  | -0.397598 | 3.711076  |
| O | 2.727817  | -3.053998 | 0.101643  | C    | 1.215353  | 1.088125  | 4.917185  |
| C | 3.663580  | -4.128988 | 0.019959  | H    | 1.405933  | 0.382127  | 5.740242  |
| H | 3.890318  | -4.401827 | 1.069050  | C    | 1.688003  | 2.410105  | 4.992784  |
| H | 4.598875  | -3.820736 | -0.490111 | H    | 2.248604  | 2.746915  | 5.878750  |
| H | 3.235548  | -5.006900 | -0.502741 | C    | 1.453053  | 3.293702  | 3.927492  |
| O | 4.105245  | -0.506115 | 1.182133  | H    | 1.829545  | 4.327471  | 3.970993  |

|   |           |           |           |    |           |           |           |
|---|-----------|-----------|-----------|----|-----------|-----------|-----------|
| C | 0.753635  | 2.860354  | 2.788866  | H  | 1.628951  | -1.966416 | -5.160781 |
| H | 0.603619  | 3.554822  | 1.950467  | C  | 0.208553  | -3.604880 | -4.937180 |
| C | -0.605100 | 2.351718  | 0.062040  | H  | 0.543271  | -4.126387 | -5.847876 |
| C | 0.107800  | 2.365911  | -1.153443 | C  | -0.811347 | -4.157634 | -4.144817 |
| H | 0.735012  | 1.501734  | -1.431105 | H  | -1.277133 | -5.114313 | -4.429110 |
| C | 0.004418  | 3.477556  | -2.005591 | C  | -1.239653 | -3.495487 | -2.980418 |
| H | 0.553970  | 3.480940  | -2.959461 | H  | -2.030606 | -3.939931 | -2.358588 |
| C | -0.802468 | 4.570356  | -1.646905 | O  | -4.302270 | 2.647435  | -0.331581 |
| H | -0.892206 | 5.434294  | -2.323251 | C  | -5.550962 | 3.280136  | -0.625258 |
| C | -1.511193 | 4.555614  | -0.431285 | H  | -6.157928 | 3.204681  | 0.298562  |
| H | -2.157344 | 5.403916  | -0.157983 | H  | -6.080729 | 2.767943  | -1.454302 |
| C | -1.416211 | 3.448529  | 0.423740  | H  | -5.415502 | 4.347971  | -0.888607 |
| H | -1.993921 | 3.420513  | 1.360109  | O  | -5.336458 | -0.267853 | -0.184405 |
| C | -2.212049 | 0.462394  | 1.580869  | C  | -6.731995 | 0.016763  | -0.052893 |
| C | -2.539687 | 0.082485  | 2.899182  | H  | -7.052037 | 0.434631  | -1.027712 |
| H | -1.807652 | 0.197634  | 3.708031  | H  | -6.920958 | 0.763442  | 0.745279  |
| C | -3.790204 | -0.464800 | 3.194616  | H  | -7.316638 | -0.899433 | 0.162729  |
| H | -4.029076 | -0.803991 | 4.212923  | Cl | -3.950845 | 3.991554  | -3.155456 |
| C | -4.747318 | -0.626606 | 2.181693  | Cl | -6.222607 | -1.487927 | 2.579426  |
| C | -4.485335 | -0.167939 | 0.869590  | C  | 1.453719  | -2.855284 | 2.932861  |
| C | -3.197133 | 0.360114  | 0.567260  | H  | 0.862958  | -2.707930 | 3.863154  |
| C | -2.968636 | 0.780330  | -0.851921 | C  | 1.810058  | -1.772000 | 2.242479  |
| C | -3.603582 | 1.977050  | -1.285326 | C  | 2.005983  | -0.697613 | 1.509428  |
| C | -3.386135 | 2.421732  | -2.611015 | C  | 3.134260  | 0.242214  | 1.547680  |
| C | -2.637810 | 1.646885  | -3.510543 | C  | 3.064046  | 1.500571  | 0.906021  |
| H | -2.501088 | 2.009737  | -4.539508 | H  | 2.155440  | 1.762402  | 0.348897  |
| C | -2.040799 | 0.456773  | -3.086569 | C  | 4.139362  | 2.398589  | 0.949527  |
| H | -1.442138 | -0.129276 | -3.797314 | C  | 5.325560  | 2.050805  | 1.616626  |
| C | -2.172132 | 0.030829  | -1.749383 | H  | 6.180381  | 2.745115  | 1.635902  |
| C | -2.298690 | -2.419445 | -0.184402 | C  | 5.420033  | 0.794546  | 2.246626  |
| C | -3.572202 | -2.747111 | -0.696773 | H  | 6.351801  | 0.502990  | 2.756440  |
| H | -3.892743 | -2.345663 | -1.670042 | C  | 4.338819  | -0.094361 | 2.218125  |
| C | -4.445769 | -3.542311 | 0.059704  | H  | 4.414438  | -1.081710 | 2.700241  |
| H | -5.445542 | -3.782754 | -0.333447 | C  | 1.778761  | -4.278559 | 2.549720  |
| C | -4.056095 | -4.007188 | 1.328749  | H  | 0.843628  | -4.857564 | 2.377614  |
| H | -4.751129 | -4.615630 | 1.927549  | H  | 2.330225  | -4.799898 | 3.363392  |
| C | -2.788597 | -3.679935 | 1.840308  | H  | 2.387961  | -4.303307 | 1.626549  |
| H | -2.485817 | -4.032794 | 2.838382  | H  | 4.051950  | 3.371943  | 0.441058  |
| C | -1.907430 | -2.889219 | 1.086251  | O  | 1.706999  | -1.998981 | -0.903718 |
| H | -0.917698 | -2.608520 | 1.486088  | O  | 3.955658  | -3.475059 | 0.153655  |
| C | -0.647065 | -2.273947 | -2.606847 | O  | 2.664522  | 0.408125  | -2.047592 |
| C | 0.402288  | -1.734094 | -3.387620 | O  | 8.067545  | 1.462290  | -1.214147 |
| H | 0.914688  | -0.816659 | -3.059341 | N  | 2.986982  | -1.644180 | -0.971213 |
| C | 0.813345  | -2.392827 | -4.555835 | C  | 4.058458  | -2.390170 | -0.399715 |

|      |           |           |           |   |           |           |           |
|------|-----------|-----------|-----------|---|-----------|-----------|-----------|
| C    | 3.403529  | -0.421573 | -1.513850 | C | -3.644220 | -0.448176 | 3.263429  |
| C    | 4.875290  | -0.356495 | -1.261789 | H | -3.839189 | -0.781856 | 4.292841  |
| C    | 5.763136  | 0.684955  | -1.510845 | C | -4.642649 | -0.617769 | 2.292480  |
| H    | 5.405265  | 1.607986  | -1.984711 | C | -4.436630 | -0.168091 | 0.967372  |
| C    | 7.105457  | 0.510049  | -1.081101 | C | -3.163354 | 0.360193  | 0.607689  |
| C    | 7.512860  | -0.696980 | -0.461644 | C | -2.991876 | 0.765490  | -0.823616 |
| H    | 8.564726  | -0.783082 | -0.150989 | C | -3.646997 | 1.955024  | -1.246332 |
| C    | 6.595276  | -1.734650 | -0.224440 | C | -3.478903 | 2.386437  | -2.583584 |
| H    | 6.905560  | -2.661103 | 0.282125  | C | -2.760794 | 1.604719  | -3.501539 |
| C    | 5.268344  | -1.546608 | -0.620070 | H | -2.662404 | 1.957468  | -4.538360 |
| C    | 7.703069  | 2.711466  | -1.790466 | C | -2.143818 | 0.421627  | -3.086848 |
| H    | 6.904504  | 3.214379  | -1.201692 | H | -1.568045 | -0.169533 | -3.812118 |
| H    | 7.357283  | 2.594070  | -2.841438 | C | -2.224512 | 0.010015  | -1.741171 |
| H    | 8.614591  | 3.337203  | -1.777159 | C | -2.284381 | -2.427300 | -0.154298 |
|      |           |           |           | C | -3.579595 | -2.754459 | -0.609200 |
|      |           |           |           | H | -3.941697 | -2.356719 | -1.569301 |
| IM6B |           |           |           | C | -4.421214 | -3.543461 | 0.188751  |
| Ni   | 0.598148  | -0.733155 | 0.092697  | H | -5.437490 | -3.783816 | -0.159494 |
| P    | -0.405249 | 0.888166  | 1.074428  | C | -3.978522 | -4.001389 | 1.442834  |
| P    | -1.154385 | -1.356266 | -1.121704 | H | -4.648539 | -4.604085 | 2.074973  |
| C    | 0.376861  | 1.576733  | 2.595501  | C | -2.689448 | -3.674526 | 1.897381  |
| C    | 0.683738  | 0.700827  | 3.661886  | H | -2.346159 | -4.021831 | 2.884135  |
| H    | 0.398969  | -0.357503 | 3.598316  | C | -1.839402 | -2.891454 | 1.100852  |
| C    | 1.406716  | 1.154831  | 4.773914  | H | -0.831189 | -2.612455 | 1.451600  |
| H    | 1.645594  | 0.454545  | 5.589321  | C | -0.720958 | -2.288253 | -2.638512 |
| C    | 1.849476  | 2.487953  | 4.830745  | C | 0.312682  | -1.758659 | -3.446740 |
| H    | 2.434989  | 2.839883  | 5.694421  | H | 0.850796  | -0.853047 | -3.127057 |
| C    | 1.554041  | 3.363643  | 3.773745  | C | 0.676968  | -2.414856 | -4.631830 |
| H    | 1.907970  | 4.405863  | 3.802094  | H | 1.480884  | -1.997198 | -5.258102 |
| C    | 0.824492  | 2.911874  | 2.661630  | C | 0.040978  | -3.613976 | -5.003342 |
| H    | 0.629071  | 3.600583  | 1.827900  | H | 0.339153  | -4.133514 | -5.927767 |
| C    | -0.588064 | 2.342422  | -0.031696 | C | -0.962980 | -4.156828 | -4.184219 |
| C    | 0.091247  | 2.336473  | -1.266596 | H | -1.452510 | -5.103785 | -4.461062 |
| H    | 0.711797  | 1.467642  | -1.545847 | C | -1.344596 | -3.496978 | -3.002400 |
| C    | -0.035904 | 3.433431  | -2.134376 | H | -2.123158 | -3.933525 | -2.359643 |
| H    | 0.487549  | 3.421192  | -3.102723 | O | -4.311916 | 2.634156  | -0.274686 |
| C    | -0.833240 | 4.532081  | -1.772043 | C | -5.571152 | 3.262838  | -0.529854 |
| H    | -0.941515 | 5.384696  | -2.459973 | H | -6.144798 | 3.196132  | 0.415635  |
| C    | -1.508976 | 4.537505  | -0.537782 | H | -6.129388 | 2.741891  | -1.334362 |
| H    | -2.148313 | 5.389965  | -0.261522 | H | -5.446543 | 4.328072  | -0.808467 |
| C    | -1.390185 | 3.444817  | 0.332776  | O | -5.331495 | -0.278373 | -0.048748 |
| H    | -1.943853 | 3.431763  | 1.283849  | C | -6.719405 | 0.011908  | 0.139636  |
| C    | -2.138056 | 0.473489  | 1.579171  | H | -7.079461 | 0.424816  | -0.823293 |
| C    | -2.408807 | 0.100413  | 2.912457  | H | -6.871962 | 0.764096  | 0.940436  |
| H    | -1.643274 | 0.221751  | 3.688897  |   |           |           |           |



|      |           |           |           |    |           |           |           |
|------|-----------|-----------|-----------|----|-----------|-----------|-----------|
| H    | -7.297178 | -0.900941 | 0.385796  | Ni | -0.371454 | 1.425865  | 1.023718  |
| Cl   | -4.065755 | 3.949877  | -3.122923 | P  | -1.025599 | 1.122063  | -1.011373 |
| Cl   | -6.098646 | -1.478808 | 2.756453  | P  | -1.042365 | -0.487501 | 1.879818  |
| C    | 1.817113  | -3.009934 | 2.600683  | C  | -1.463237 | 2.650623  | -1.939227 |
| C    | 1.989424  | -1.814618 | 2.039497  | C  | -2.286071 | 3.586805  | -1.271392 |
| C    | 2.080399  | -0.685576 | 1.369211  | H  | -2.620754 | 3.373749  | -0.243462 |
| C    | 3.164249  | 0.306935  | 1.422942  | C  | -2.646501 | 4.789832  | -1.892207 |
| C    | 3.067432  | 1.545039  | 0.748217  | H  | -3.280933 | 5.512241  | -1.356849 |
| H    | 2.165314  | 1.760444  | 0.161825  | C  | -2.162398 | 5.088769  | -3.178323 |
| C    | 4.111132  | 2.480123  | 0.790571  | H  | -2.427226 | 6.043498  | -3.658758 |
| C    | 5.291133  | 2.192053  | 1.495380  | C  | -1.319245 | 4.178320  | -3.835349 |
| H    | 6.119221  | 2.917956  | 1.521000  | H  | -0.920130 | 4.416422  | -4.833970 |
| C    | 5.413078  | 0.955774  | 2.160318  | C  | -0.970056 | 2.962941  | -3.220936 |
| H    | 6.340698  | 0.710422  | 2.701121  | H  | -0.296821 | 2.263956  | -3.737998 |
| C    | 4.364072  | 0.030253  | 2.129376  | C  | 0.172009  | 0.221002  | -2.077636 |
| H    | 4.461100  | -0.940700 | 2.640305  | C  | 1.425898  | -0.092707 | -1.520625 |
| H    | 4.002273  | 3.436363  | 0.254494  | H  | 1.612726  | 0.212141  | -0.482276 |
| O    | 1.667051  | -2.030775 | -1.010707 | C  | 2.364050  | -0.827590 | -2.261045 |
| O    | 3.842033  | -3.574581 | 0.083473  | H  | 3.335218  | -1.088908 | -1.813968 |
| O    | 2.708351  | 0.339187  | -2.149516 | C  | 2.052149  | -1.245347 | -3.566024 |
| O    | 8.082005  | 1.313758  | -1.077640 | H  | 2.783956  | -1.827718 | -4.146428 |
| N    | 2.959379  | -1.725669 | -1.080163 | C  | 0.795752  | -0.941962 | -4.122584 |
| C    | 3.992618  | -2.491022 | -0.461084 | H  | 0.546331  | -1.284293 | -5.139423 |
| C    | 3.415113  | -0.508067 | -1.599420 | C  | -0.150953 | -0.220072 | -3.378685 |
| C    | 4.876485  | -0.468935 | -1.286364 | H  | -1.150312 | -0.023313 | -3.796267 |
| C    | 5.787795  | 0.561397  | -1.490973 | C  | -2.540127 | 0.074582  | -1.202925 |
| H    | 5.463441  | 1.489025  | -1.979398 | C  | -3.776678 | 0.642583  | -1.569285 |
| C    | 7.104855  | 0.371302  | -0.994511 | H  | -3.831899 | 1.701789  | -1.856579 |
| C    | 7.467439  | -0.840997 | -0.358139 | C  | -4.949058 | -0.120237 | -1.546776 |
| H    | 8.501121  | -0.938991 | 0.005484  | H  | -5.921803 | 0.329880  | -1.792621 |
| C    | 6.527439  | -1.868982 | -0.169444 | C  | -4.893193 | -1.470253 | -1.172370 |
| H    | 6.802402  | -2.799537 | 0.349943  | C  | -3.657557 | -2.084623 | -0.865866 |
| C    | 5.223313  | -1.665499 | -0.627997 | C  | -2.474775 | -1.300577 | -0.861266 |
| C    | 7.761588  | 2.563445  | -1.678909 | C  | -1.192809 | -2.000747 | -0.516120 |
| H    | 6.937171  | 3.076418  | -1.136657 | C  | -0.668627 | -2.874719 | -1.520031 |
| H    | 7.472144  | 2.443161  | -2.746469 | C  | 0.572281  | -3.512354 | -1.280823 |
| H    | 8.677292  | 3.180343  | -1.619259 | C  | 1.233540  | -3.332855 | -0.054639 |
| C    | 1.081998  | -3.294114 | 3.887368  | H  | 2.200360  | -3.831525 | 0.104372  |
| H    | 0.653131  | -2.375488 | 4.335451  | C  | 0.699472  | -2.509558 | 0.936262  |
| H    | 0.251492  | -4.015326 | 3.717612  | H  | 1.267138  | -2.376102 | 1.863987  |
| H    | 1.750703  | -3.762221 | 4.643405  | C  | -0.512913 | -1.825826 | 0.715477  |
| H    | 2.258287  | -3.870901 | 2.059423  | C  | -2.867370 | -0.691419 | 1.991986  |
|      |           |           |           | C  | -3.453752 | -1.952338 | 2.233503  |
| TS3A |           |           |           | H  | -2.814795 | -2.844110 | 2.322579  |

|    |           |           |           |      |           |           |           |
|----|-----------|-----------|-----------|------|-----------|-----------|-----------|
| C  | -4.847205 | -2.070872 | 2.327398  | H    | -1.136949 | 5.429162  | 2.064818  |
| H  | -5.302289 | -3.059384 | 2.492474  | C    | 2.943840  | 2.719268  | 3.317026  |
| C  | -5.662779 | -0.933172 | 2.183391  | H    | 3.701303  | 1.918468  | 3.451843  |
| H  | -6.757754 | -1.031228 | 2.241807  | H    | 2.991998  | 3.363024  | 4.224988  |
| C  | -5.081571 | 0.323754  | 1.945902  | H    | 3.209049  | 3.326830  | 2.432151  |
| H  | -5.718580 | 1.213239  | 1.820970  | H    | 1.119630  | 6.008905  | -2.373065 |
| C  | -3.685251 | 0.445379  | 1.852284  | O    | 2.024441  | 0.516230  | 1.745082  |
| H  | -3.209388 | 1.418367  | 1.645478  | O    | 3.298376  | 2.337657  | -0.039697 |
| C  | -0.522309 | -0.988773 | 3.590115  | O    | 3.703085  | -1.782887 | 2.078973  |
| C  | 0.845076  | -1.153063 | 3.915101  | O    | 8.175577  | -1.919679 | -1.234013 |
| H  | 1.616823  | -0.975470 | 3.151826  | N    | 3.211522  | 0.341919  | 1.204207  |
| C  | 1.231311  | -1.481211 | 5.224674  | C    | 3.781334  | 1.254917  | 0.259258  |
| H  | 2.301608  | -1.619929 | 5.445344  | C    | 3.978515  | -0.837915 | 1.346431  |
| C  | 0.270982  | -1.615698 | 6.241934  | C    | 5.131449  | -0.669190 | 0.405259  |
| H  | 0.578035  | -1.865634 | 7.269900  | C    | 6.167044  | -1.558048 | 0.122949  |
| C  | -1.085332 | -1.414135 | 5.936693  | H    | 6.217497  | -2.524454 | 0.642360  |
| H  | -1.850149 | -1.498900 | 6.725037  | C    | 7.120437  | -1.157270 | -0.852845 |
| C  | -1.481062 | -1.106996 | 4.623783  | C    | 7.004808  | 0.101572  | -1.497326 |
| H  | -2.548184 | -0.957326 | 4.409438  | H    | 7.766446  | 0.363087  | -2.246842 |
| O  | -1.438188 | -2.931093 | -2.639182 | C    | 5.951711  | 0.979609  | -1.192911 |
| C  | -1.315762 | -3.923974 | -3.653210 | H    | 5.859306  | 1.951754  | -1.700109 |
| H  | -2.240820 | -3.837972 | -4.255996 | C    | 5.013038  | 0.581057  | -0.234950 |
| H  | -1.248794 | -4.945323 | -3.226338 | C    | 8.343621  | -3.199554 | -0.630393 |
| H  | -0.437093 | -3.741270 | -4.303039 | H    | 7.474412  | -3.863342 | -0.832558 |
| O  | -3.533964 | -3.384790 | -0.482927 | H    | 8.489515  | -3.116771 | 0.469007  |
| C  | -4.032528 | -4.420051 | -1.336979 | H    | 9.250246  | -3.638795 | -1.085309 |
| H  | -3.303415 | -5.253549 | -1.286628 |      |           |           |           |
| H  | -4.111774 | -4.071076 | -2.386805 | TS3B |           |           |           |
| H  | -5.026081 | -4.778500 | -0.998430 | Ni   | -0.369133 | 1.370285  | 1.117478  |
| Cl | 1.420064  | -4.489367 | -2.478381 | P    | -1.105191 | 1.234822  | -0.900556 |
| Cl | -6.391643 | -2.365139 | -1.005392 | P    | -0.897729 | -0.658578 | 1.781565  |
| C  | 1.569978  | 2.133645  | 3.182884  | C    | -1.648360 | 2.812950  | -1.678192 |
| H  | 1.248897  | 1.411992  | 3.954257  | C    | -2.434409 | 3.680087  | -0.886471 |
| C  | 0.619946  | 2.641597  | 2.319102  | H    | -2.674591 | 3.393361  | 0.149951  |
| C  | 0.206889  | 3.216660  | 1.214241  | C    | -2.875538 | 4.907638  | -1.398277 |
| C  | 0.096384  | 4.494407  | 0.536571  | H    | -3.477335 | 5.578573  | -0.766831 |
| C  | 0.727114  | 4.666752  | -0.720211 | C    | -2.514820 | 5.295349  | -2.700994 |
| H  | 1.301982  | 3.829083  | -1.140216 | H    | -2.843162 | 6.268988  | -3.096869 |
| C  | 0.625143  | 5.888210  | -1.396729 | C    | -1.715770 | 4.448178  | -3.485759 |
| C  | -0.116553 | 6.949813  | -0.845756 | H    | -1.415977 | 4.754640  | -4.500324 |
| H  | -0.205924 | 7.903628  | -1.388875 | C    | -1.282850 | 3.210984  | -2.978563 |
| C  | -0.747193 | 6.783694  | 0.399698  | H    | -0.642462 | 2.562739  | -3.594000 |
| H  | -1.328904 | 7.610100  | 0.838738  | C    | 0.136332  | 0.521549  | -2.051381 |
| C  | -0.640895 | 5.567412  | 1.091770  | C    | 1.439733  | 0.330459  | -1.553985 |

|   |           |           |           |    |           |           |           |
|---|-----------|-----------|-----------|----|-----------|-----------|-----------|
| H | 1.641846  | 0.617371  | -0.511660 | H  | -1.624028 | -1.900160 | 6.564390  |
| C | 2.423797  | -0.253259 | -2.367230 | C  | -1.271438 | -1.414932 | 4.480624  |
| H | 3.438755  | -0.413939 | -1.972754 | H  | -2.317633 | -1.120134 | 4.320001  |
| C | 2.106635  | -0.644369 | -3.678865 | O  | -1.413999 | -2.661877 | -2.982824 |
| H | 2.874620  | -1.113287 | -4.312977 | C  | -1.680058 | -3.886278 | -3.670795 |
| C | 0.802065  | -0.464223 | -4.174120 | H  | -2.720157 | -3.815825 | -4.047653 |
| H | 0.547037  | -0.799435 | -5.191362 | H  | -1.597781 | -4.759064 | -2.990628 |
| C | -0.186575 | 0.111966  | -3.362746 | H  | -0.989643 | -4.031255 | -4.526218 |
| H | -1.219298 | 0.205006  | -3.731589 | O  | -3.382952 | -3.392354 | -0.735295 |
| C | -2.578449 | 0.146205  | -1.164877 | C  | -4.174643 | -4.443183 | -1.290767 |
| C | -3.844258 | 0.707641  | -1.428606 | H  | -3.504572 | -5.323011 | -1.352992 |
| H | -3.944873 | 1.786033  | -1.612066 | H  | -4.539512 | -4.187695 | -2.306543 |
| C | -4.986581 | -0.095716 | -1.426554 | H  | -5.041680 | -4.688143 | -0.645859 |
| H | -5.982864 | 0.341281  | -1.587289 | Cl | 1.385748  | -4.005836 | -3.179252 |
| C | -4.886428 | -1.472980 | -1.174133 | Cl | -6.391048 | -2.366143 | -1.004862 |
| C | -3.620572 | -2.079397 | -0.988069 | C  | 1.719961  | 2.039272  | 3.172871  |
| C | -2.462838 | -1.249825 | -0.961619 | C  | 0.728640  | 2.558376  | 2.364501  |
| C | -1.138984 | -1.921802 | -0.752510 | C  | 0.223588  | 3.153056  | 1.315460  |
| C | -0.636845 | -2.657812 | -1.863477 | C  | 0.078689  | 4.469847  | 0.720637  |
| C | 0.644861  | -3.245195 | -1.781222 | C  | 0.621706  | 4.721996  | -0.562308 |
| C | 1.385775  | -3.165990 | -0.593994 | H  | 1.158029  | 3.912646  | -1.078262 |
| H | 2.384788  | -3.622413 | -0.545753 | C  | 0.476108  | 5.982290  | -1.154803 |
| C | 0.874069  | -2.475261 | 0.507064  | C  | -0.217762 | 7.008286  | -0.486792 |
| H | 1.499099  | -2.413433 | 1.402973  | H  | -0.340550 | 7.994070  | -0.962035 |
| C | -0.379628 | -1.833498 | 0.444724  | C  | -0.757014 | 6.765876  | 0.788664  |
| C | -2.712157 | -0.950763 | 1.930068  | H  | -1.299764 | 7.564316  | 1.319652  |
| C | -3.232878 | -2.250411 | 2.108426  | C  | -0.611299 | 5.507199  | 1.391623  |
| H | -2.551794 | -3.114953 | 2.116082  | H  | -1.039513 | 5.306944  | 2.385900  |
| C | -4.613885 | -2.437131 | 2.257614  | H  | 0.899618  | 6.162887  | -2.154974 |
| H | -5.019193 | -3.453355 | 2.381638  | O  | 2.095479  | 0.387257  | 1.807575  |
| C | -5.482552 | -1.329979 | 2.232171  | O  | 3.415430  | 2.411278  | 0.303226  |
| H | -6.568076 | -1.480451 | 2.335977  | O  | 3.771041  | -1.955795 | 1.858620  |
| C | -4.966252 | -0.034936 | 2.058799  | O  | 8.296331  | -1.684034 | -1.361907 |
| H | -5.644710 | 0.831790  | 2.028142  | N  | 3.283378  | 0.260365  | 1.242740  |
| C | -3.582254 | 0.154893  | 1.911532  | C  | 3.881221  | 1.289809  | 0.447128  |
| H | -3.155936 | 1.160056  | 1.756824  | C  | 4.049618  | -0.922729 | 1.253134  |
| C | -0.339252 | -1.345152 | 3.416076  | C  | 5.217948  | -0.643207 | 0.357775  |
| C | 1.004728  | -1.691329 | 3.681010  | C  | 6.256230  | -1.493556 | -0.016726 |
| H | 1.786658  | -1.526017 | 2.929404  | H  | 6.292074  | -2.520248 | 0.371708  |
| C | 1.383427  | -2.168979 | 4.946303  | C  | 7.233871  | -0.972547 | -0.908612 |
| H | 2.435569  | -2.448834 | 5.114187  | C  | 7.137742  | 0.361103  | -1.382710 |
| C | 0.447534  | -2.258400 | 5.989296  | H  | 7.917631  | 0.715033  | -2.073146 |
| H | 0.751125  | -2.621767 | 6.983881  | C  | 6.081340  | 1.198405  | -0.986918 |
| C | -0.879046 | -1.858898 | 5.753904  | H  | 6.005319  | 2.230529  | -1.360894 |

|      |           |           |           |    |           |           |           |
|------|-----------|-----------|-----------|----|-----------|-----------|-----------|
| C    | 5.119920  | 0.681717  | -0.111686 | C  | -3.495040 | -0.715282 | 0.774025  |
| C    | 8.448640  | -3.032172 | -0.926361 | C  | -3.313975 | -1.275436 | -0.605093 |
| H    | 7.585068  | -3.661237 | -1.235478 | C  | -4.468550 | -1.345431 | -1.438312 |
| H    | 8.566197  | -3.093971 | 0.177838  | C  | -4.313766 | -1.805332 | -2.769641 |
| H    | 9.366642  | -3.411501 | -1.411420 | C  | -3.067277 | -2.271174 | -3.219781 |
| C    | 1.486792  | 1.402278  | 4.503379  | H  | -2.985808 | -2.637735 | -4.253504 |
| H    | 0.469631  | 0.977461  | 4.585815  | C  | -1.950198 | -2.245798 | -2.381071 |
| H    | 2.225067  | 0.602186  | 4.702558  | H  | -0.984702 | -2.614527 | -2.755189 |
| H    | 1.614787  | 2.172488  | 5.299102  | C  | -2.055526 | -1.725100 | -1.075439 |
| H    | 2.745423  | 2.394360  | 2.958675  | C  | -0.916256 | -2.132941 | 1.561219  |
|      |           |           |           | C  | -1.560884 | -3.381193 | 1.692256  |
| IM7A |           |           |           | H  | -1.856077 | -3.942952 | 0.792706  |
| Ni   | -0.040205 | 0.696533  | -0.169820 | C  | -1.872185 | -3.878492 | 2.966406  |
| P    | -2.001874 | 1.556548  | -0.040534 | H  | -2.395738 | -4.841913 | 3.064810  |
| P    | -0.535674 | -1.384180 | -0.072963 | C  | -1.545402 | -3.133252 | 4.113671  |
| C    | -2.044864 | 3.266434  | 0.651469  | H  | -1.807966 | -3.517344 | 5.111347  |
| C    | -1.104738 | 3.565817  | 1.664103  | C  | -0.904480 | -1.888953 | 3.986482  |
| H    | -0.425619 | 2.774373  | 2.020410  | H  | -0.662373 | -1.297280 | 4.883044  |
| C    | -0.996056 | 4.866540  | 2.174209  | C  | -0.589978 | -1.388539 | 2.712980  |
| H    | -0.247970 | 5.087556  | 2.950809  | H  | -0.112542 | -0.402294 | 2.591839  |
| C    | -1.808721 | 5.892694  | 1.660571  | C  | 0.749387  | -2.490809 | -0.802925 |
| H    | -1.705427 | 6.920906  | 2.041021  | C  | 1.402004  | -2.031000 | -1.970970 |
| C    | -2.737360 | 5.605894  | 0.646337  | H  | 1.099046  | -1.067533 | -2.413636 |
| H    | -3.367787 | 6.408381  | 0.231594  | C  | 2.456382  | -2.763716 | -2.535923 |
| C    | -2.859022 | 4.298288  | 0.144299  | H  | 2.964629  | -2.385110 | -3.435668 |
| H    | -3.574365 | 4.088957  | -0.664787 | C  | 2.890172  | -3.955047 | -1.925355 |
| C    | -3.049815 | 1.622604  | -1.549128 | H  | 3.732852  | -4.519201 | -2.354619 |
| C    | -2.423624 | 1.379234  | -2.788807 | C  | 2.257181  | -4.410634 | -0.756945 |
| H    | -1.339107 | 1.180832  | -2.807140 | H  | 2.600218  | -5.336015 | -0.267656 |
| C    | -3.182684 | 1.358865  | -3.969509 | C  | 1.188639  | -3.685951 | -0.198516 |
| H    | -2.692499 | 1.150103  | -4.933094 | H  | 0.708088  | -4.045074 | 0.723609  |
| C    | -4.568583 | 1.587455  | -3.917653 | O  | -5.603965 | -0.880750 | -0.854681 |
| H    | -5.166071 | 1.557930  | -4.841682 | C  | -6.913854 | -1.285120 | -1.249646 |
| C    | -5.195793 | 1.836012  | -2.683474 | H  | -7.561328 | -1.086819 | -0.373278 |
| H    | -6.283665 | 2.002542  | -2.641417 | H  | -6.952822 | -2.365514 | -1.497669 |
| C    | -4.441827 | 1.848260  | -1.500108 | H  | -7.280950 | -0.700002 | -2.115979 |
| H    | -4.939001 | 1.996894  | -0.529365 | O  | -4.529059 | -2.776745 | 1.307274  |
| C    | -3.039783 | 0.576954  | 1.143304  | C  | -5.872552 | -3.214995 | 1.531459  |
| C    | -3.237962 | 1.029531  | 2.463522  | H  | -6.166729 | -3.803817 | 0.639625  |
| H    | -2.900650 | 2.034469  | 2.755535  | H  | -6.563762 | -2.354228 | 1.642202  |
| C    | -3.838684 | 0.202947  | 3.419860  | H  | -5.945544 | -3.854457 | 2.434541  |
| H    | -3.959892 | 0.538137  | 4.460235  | Cl | -5.612025 | -1.758679 | -3.957023 |
| C    | -4.274041 | -1.081100 | 3.060583  | Cl | -4.911815 | -2.133746 | 4.310495  |
| C    | -4.143595 | -1.540870 | 1.729606  | C  | 3.084294  | 0.140509  | 0.008524  |

|      |           |           |           |   |           |           |           |
|------|-----------|-----------|-----------|---|-----------|-----------|-----------|
| H    | 3.179335  | -0.612825 | -0.803706 | C | -0.456819 | 3.396918  | 1.700761  |
| C    | 1.832841  | 0.898025  | -0.142730 | H | 0.144967  | 2.509132  | 1.952103  |
| C    | 1.284595  | 2.071738  | -0.308060 | C | -0.111473 | 4.647625  | 2.230244  |
| C    | 1.417743  | 3.512202  | -0.328881 | H | 0.743962  | 4.730866  | 2.917856  |
| C    | 0.487223  | 4.317693  | -1.030462 | C | -0.826340 | 5.795648  | 1.845906  |
| H    | -0.310536 | 3.820750  | -1.602518 | H | -0.538851 | 6.782724  | 2.240383  |
| C    | 0.566573  | 5.714742  | -0.976986 | C | -1.894276 | 5.680649  | 0.941085  |
| C    | 1.575299  | 6.336280  | -0.217521 | H | -2.450590 | 6.577653  | 0.625888  |
| H    | 1.629522  | 7.435174  | -0.163265 | C | -2.251562 | 4.424865  | 0.419870  |
| C    | 2.516538  | 5.547241  | 0.470921  | H | -3.075385 | 4.351398  | -0.305007 |
| H    | 3.314676  | 6.029098  | 1.058470  | C | -3.103617 | 1.892142  | -1.234391 |
| C    | 2.447447  | 4.147651  | 0.413271  | C | -2.755992 | 1.643863  | -2.577489 |
| H    | 3.183093  | 3.521114  | 0.941034  | H | -1.735071 | 1.295729  | -2.805730 |
| C    | 3.189267  | -0.548505 | 1.369131  | C | -3.710978 | 1.805779  | -3.593904 |
| H    | 4.137054  | -1.115287 | 1.464413  | H | -3.440129 | 1.593888  | -4.639907 |
| H    | 2.352507  | -1.267433 | 1.467137  | C | -5.014699 | 2.220611  | -3.272669 |
| H    | 3.121246  | 0.195277  | 2.187247  | H | -5.767326 | 2.334615  | -4.067772 |
| H    | -0.173048 | 6.324814  | -1.518669 | C | -5.364641 | 2.471436  | -1.933362 |
| O    | 4.175315  | 1.131053  | -0.201496 | H | -6.390529 | 2.782060  | -1.680505 |
| O    | 5.897041  | 1.645668  | 2.009226  | C | -4.414853 | 2.304571  | -0.914531 |
| O    | 5.530549  | -0.686671 | -1.997885 | H | -4.698175 | 2.461921  | 0.137410  |
| O    | 10.715658 | -2.078178 | -0.503836 | C | -2.714544 | 0.664294  | 1.365490  |
| N    | 5.410224  | 0.582232  | -0.026893 | C | -2.556689 | 1.012158  | 2.722916  |
| C    | 6.230020  | 0.922246  | 1.086327  | H | -2.027989 | 1.936066  | 2.996589  |
| C    | 6.033251  | -0.260723 | -0.969316 | C | -3.048405 | 0.182004  | 3.736438  |
| C    | 7.395090  | -0.509031 | -0.386565 | H | -2.890600 | 0.431482  | 4.795846  |
| C    | 8.428487  | -1.294725 | -0.895302 | C | -3.735289 | -0.996011 | 3.407366  |
| H    | 8.295770  | -1.829646 | -1.845355 | C | -3.970048 | -1.337897 | 2.055559  |
| C    | 9.627573  | -1.359046 | -0.136957 | C | -3.424497 | -0.518219 | 1.032130  |
| C    | 9.745082  | -0.646133 | 1.086251  | C | -3.617116 | -0.969518 | -0.382920 |
| H    | 10.694459 | -0.730324 | 1.635645  | C | -4.914992 | -0.825079 | -0.952373 |
| C    | 8.689952  | 0.136363  | 1.576236  | C | -5.098252 | -1.182992 | -2.310935 |
| H    | 8.785563  | 0.685832  | 2.524876  | C | -4.042748 | -1.746508 | -3.046388 |
| C    | 7.508695  | 0.199998  | 0.825478  | H | -4.222965 | -2.024592 | -4.095072 |
| C    | 10.664955 | -2.817624 | -1.721716 | C | -2.783992 | -1.924498 | -2.466406 |
| H    | 10.506805 | -2.150313 | -2.597062 | H | -1.971102 | -2.362897 | -3.062043 |
| H    | 9.860878  | -3.585518 | -1.698567 | C | -2.552013 | -1.517595 | -1.136966 |
| H    | 11.644934 | -3.319404 | -1.818726 | C | -0.993805 | -2.424366 | 1.129375  |
|      |           |           |           | C | -1.824493 | -3.556181 | 1.266508  |
|      |           |           |           | H | -2.403702 | -3.919157 | 0.403712  |
| IM7B |           |           |           | C | -1.959157 | -4.179687 | 2.516223  |
| Ni   | -0.013958 | 0.499513  | -0.361661 | H | -2.626887 | -5.048283 | 2.624753  |
| P    | -1.812117 | 1.607948  | 0.041574  | C | -1.270532 | -3.676080 | 3.634052  |
| P    | -0.831667 | -1.487609 | -0.444120 | H | -1.394603 | -4.155080 | 4.617489  |
| C    | -1.537579 | 3.270067  | 0.797341  |   |           |           |           |

|    |           |           |           |        |           |           |           |
|----|-----------|-----------|-----------|--------|-----------|-----------|-----------|
| C  | -0.442234 | -2.548089 | 3.501420  | H      | 2.944059  | -1.915798 | -1.404040 |
| H  | 0.084933  | -2.142965 | 4.379314  | H      | 0.437671  | 6.106745  | -1.602564 |
| C  | -0.304207 | -1.922056 | 2.252588  | O      | 4.189861  | 0.433135  | -0.741800 |
| H  | 0.316403  | -1.018269 | 2.133519  | O      | 5.495135  | 1.565442  | 1.530603  |
| C  | 0.071301  | -2.608163 | -1.596520 | O      | 6.036366  | -1.373049 | -2.033355 |
| C  | 0.630137  | -2.010081 | -2.748526 | O      | 11.114899 | -1.613367 | 0.233008  |
| H  | 0.512936  | -0.924469 | -2.901961 | N      | 5.432951  | 0.091920  | -0.295412 |
| C  | 1.362202  | -2.779728 | -3.665012 | C      | 6.049764  | 0.759994  | 0.798084  |
| H  | 1.796660  | -2.302080 | -4.556928 | C      | 6.309906  | -0.741285 | -1.027910 |
| C  | 1.567712  | -4.150985 | -3.424865 | C      | 7.605534  | -0.649949 | -0.272036 |
| H  | 2.159548  | -4.752405 | -4.132560 | C      | 8.807224  | -1.308817 | -0.527732 |
| C  | 1.028889  | -4.747080 | -2.271741 | H      | 8.887430  | -1.991901 | -1.384074 |
| H  | 1.198239  | -5.817233 | -2.073186 | C      | 9.889060  | -1.050577 | 0.355453  |
| C  | 0.276563  | -3.981748 | -1.363085 | C      | 9.729056  | -0.156789 | 1.448524  |
| H  | -0.133744 | -4.453846 | -0.457844 | H      | 10.598357 | 0.009333  | 2.101924  |
| O  | -5.833360 | -0.271155 | -0.118295 | C      | 8.508768  | 0.490748  | 1.685639  |
| C  | -7.236049 | -0.508870 | -0.230186 | H      | 8.390045  | 1.181701  | 2.533792  |
| H  | -7.651277 | -0.317005 | 0.778467  | C      | 7.443874  | 0.236534  | 0.810631  |
| H  | -7.452585 | -1.556683 | -0.522457 | C      | 11.344924 | -2.520463 | -0.843070 |
| H  | -7.712373 | 0.176821  | -0.958639 | H      | 11.203069 | -2.026542 | -1.829113 |
| O  | -4.626357 | -2.460685 | 1.651200  | H      | 10.675662 | -3.406158 | -0.778838 |
| C  | -5.930394 | -2.744666 | 2.165937  | H      | 12.395556 | -2.850219 | -0.748643 |
| H  | -6.497956 | -3.219688 | 1.341061  |        |           |           |           |
| H  | -6.451140 | -1.815592 | 2.477408  | (S)-3a |           |           |           |
| H  | -5.885427 | -3.439413 | 3.029002  | O      | 0.463758  | -0.028440 | -0.304369 |
| Cl | -6.596075 | -0.881042 | -3.183408 | O      | -0.857479 | 2.463000  | 0.197844  |
| Cl | -4.230560 | -2.068593 | 4.704435  | O      | -1.540038 | -2.085429 | -0.497213 |
| C  | 3.117816  | -0.274706 | 0.014367  | O      | -6.812045 | -0.321095 | -0.240374 |
| H  | 3.357612  | -0.131777 | 1.094901  | N      | -0.877676 | 0.135511  | -0.099799 |
| C  | 1.879675  | 0.488183  | -0.252274 | C      | 1.212536  | 0.002569  | 0.976152  |
| C  | 1.452546  | 1.707534  | -0.460208 | H      | 0.970075  | 0.975097  | 1.462222  |
| C  | 1.755083  | 3.122810  | -0.497524 | C      | 2.623018  | -0.008421 | 0.605018  |
| C  | 0.886544  | 4.033449  | -1.147727 | C      | 3.818549  | -0.031631 | 0.325587  |
| H  | 0.003045  | 3.633267  | -1.667943 | C      | 5.210554  | -0.048839 | -0.002531 |
| C  | 1.131703  | 5.411423  | -1.104981 | C      | 5.877682  | 1.148437  | -0.373253 |
| C  | 2.253052  | 5.906459  | -0.413416 | H      | 5.308906  | 2.089722  | -0.406087 |
| H  | 2.440606  | 6.991168  | -0.369404 | C      | 7.241821  | 1.126800  | -0.694297 |
| C  | 3.135223  | 5.010166  | 0.219497  | C      | 7.962051  | -0.081095 | -0.651145 |
| H  | 4.019605  | 5.392835  | 0.754249  | H      | 9.033676  | -0.093690 | -0.904243 |
| C  | 2.897372  | 3.628638  | 0.176468  | C      | 7.310269  | -1.273025 | -0.285019 |
| H  | 3.586247  | 2.924759  | 0.669348  | H      | 7.870777  | -2.220308 | -0.251443 |
| C  | 3.103315  | -1.758657 | -0.321289 | C      | 5.946165  | -1.262541 | 0.036863  |
| H  | 2.276099  | -2.249403 | 0.228416  | H      | 5.430585  | -2.191960 | 0.321586  |
| H  | 4.053316  | -2.243698 | -0.021580 | C      | 0.819339  | -1.168281 | 1.879097  |

|        |           |           |           |          |           |           |           |
|--------|-----------|-----------|-----------|----------|-----------|-----------|-----------|
| H      | -0.255129 | -1.109279 | 2.143041  | C        | -1.636942 | 1.540594  | -0.450676 |
| H      | 1.405982  | -1.129216 | 2.818378  | C        | -1.672624 | -0.808787 | -0.044571 |
| H      | 1.014367  | -2.129994 | 1.366907  | C        | -3.082115 | -0.302080 | -0.128230 |
| C      | -1.475396 | 1.422602  | 0.045833  | C        | -4.272148 | -1.016117 | 0.008880  |
| C      | -1.806263 | -0.912394 | -0.304819 | H        | -4.245907 | -2.097174 | 0.200743  |
| C      | -3.140046 | -0.227898 | -0.216274 | C        | -5.483717 | -0.285707 | -0.114797 |
| C      | -4.411006 | -0.794604 | -0.303293 | C        | -5.458813 | 1.113867  | -0.361296 |
| H      | -4.520917 | -1.874790 | -0.468527 | H        | -6.425027 | 1.632651  | -0.447712 |
| C      | -5.521489 | 0.080994  | -0.172428 | C        | -4.248675 | 1.808567  | -0.490816 |
| C      | -5.321007 | 1.471393  | 0.044294  | H        | -4.235178 | 2.892406  | -0.680330 |
| H      | -6.214741 | 2.105846  | 0.138462  | C        | -3.054064 | 1.084707  | -0.374551 |
| C      | -4.032742 | 2.015296  | 0.133191  | C        | -6.812755 | -2.242841 | 0.230725  |
| H      | -3.883307 | 3.092378  | 0.301668  | H        | -6.336932 | -2.522677 | 1.195932  |
| C      | -2.938193 | 1.149991  | -0.002905 | H        | -6.347900 | -2.831157 | -0.590312 |
| C      | -7.086389 | -1.703362 | -0.461878 | H        | -7.892899 | -2.471900 | 0.276938  |
| H      | -6.679610 | -2.334958 | 0.357801  | H        | 8.088297  | 1.560758  | -0.128242 |
| H      | -6.668719 | -2.049921 | -1.432254 |          |           |           |           |
| H      | -8.187148 | -1.799030 | -0.483673 | (R)-IM1A |           |           |           |
| H      | 7.748671  | 2.061276  | -0.981500 | Ni       | 1.302894  | 0.478191  | -0.608654 |
|        |           |           |           | P        | 0.401917  | -1.409363 | -0.083505 |
| (R)-3a |           |           |           | P        | -0.467763 | 1.714641  | -0.506363 |
| O      | 0.471683  | 0.303064  | -0.379744 | C        | 1.301768  | -2.917062 | -0.650424 |
| O      | -1.165401 | 2.644333  | -0.655042 | C        | 1.924720  | -2.853708 | -1.916584 |
| O      | -1.249936 | -1.937587 | 0.145031  | H        | 1.828497  | -1.933915 | -2.516008 |
| O      | -6.714013 | -0.840758 | -0.012219 | C        | 2.699185  | -3.924183 | -2.384923 |
| N      | -0.883264 | 0.351733  | -0.209797 | H        | 3.191926  | -3.854229 | -3.366768 |
| C      | 1.177206  | 0.198650  | 0.921659  | C        | 2.876903  | -5.065825 | -1.583624 |
| H      | 0.799841  | -0.726736 | 1.414083  | H        | 3.505378  | -5.897107 | -1.939499 |
| C      | 2.586407  | 0.024379  | 0.588601  | C        | 2.265122  | -5.134107 | -0.321038 |
| C      | 3.782093  | -0.105381 | 0.340754  | H        | 2.410165  | -6.020922 | 0.315970  |
| C      | 5.173544  | -0.263123 | 0.049887  | C        | 1.479821  | -4.066044 | 0.144971  |
| C      | 6.052791  | 0.850122  | 0.108577  | H        | 1.027307  | -4.118829 | 1.145849  |
| H      | 5.649099  | 1.837372  | 0.378904  | C        | 0.191981  | -1.639973 | 1.727509  |
| C      | 7.415713  | 0.690164  | -0.176550 | C        | 0.867239  | -0.741188 | 2.579575  |
| C      | 7.924024  | -0.574719 | -0.524769 | H        | 1.489087  | 0.062130  | 2.151096  |
| H      | 8.995266  | -0.696037 | -0.749074 | C        | 0.714222  | -0.847127 | 3.971652  |
| C      | 7.060839  | -1.684072 | -0.586994 | H        | 1.234679  | -0.130997 | 4.626081  |
| H      | 7.455297  | -2.675181 | -0.860373 | C        | -0.110885 | -1.845214 | 4.516665  |
| C      | 5.696508  | -1.535201 | -0.302532 | H        | -0.243799 | -1.916264 | 5.607363  |
| H      | 5.016429  | -2.398806 | -0.350440 | C        | -0.789369 | -2.739155 | 3.667955  |
| C      | 0.915195  | 1.424354  | 1.799192  | H        | -1.459307 | -3.502844 | 4.092095  |
| H      | 1.475524  | 1.328903  | 2.750372  | C        | -0.642273 | -2.637155 | 2.276738  |
| H      | -0.162805 | 1.503211  | 2.042542  | H        | -1.214156 | -3.302371 | 1.612052  |
| H      | 1.236306  | 2.345567  | 1.276398  | C        | -1.293281 | -1.646842 | -0.781720 |

|   |           |           |           |          |           |           |           |
|---|-----------|-----------|-----------|----------|-----------|-----------|-----------|
| C | -1.480924 | -2.464073 | -1.915472 | H        | -6.425428 | 0.256911  | 0.318988  |
| H | -0.659497 | -3.093541 | -2.285970 | H        | -6.229372 | -1.345261 | -0.495932 |
| C | -2.702254 | -2.457107 | -2.592562 | H        | -6.362660 | 0.160660  | -1.484377 |
| H | -2.846171 | -3.061029 | -3.500372 | Cl       | -3.360543 | -0.400703 | 4.805088  |
| C | -3.764172 | -1.653303 | -2.145711 | Cl       | -5.200788 | -1.609671 | -3.161690 |
| C | -3.630025 | -0.876299 | -0.969025 | C        | 2.931788  | 1.405893  | -0.935576 |
| C | -2.367680 | -0.858130 | -0.306245 | C        | 3.166339  | 0.126651  | -0.788264 |
| C | -2.243566 | 0.001319  | 0.915288  | C        | 4.125984  | -0.953612 | -0.767045 |
| C | -2.888053 | -0.473908 | 2.089338  | C        | 4.149909  | -1.875988 | 0.308769  |
| C | -2.746864 | 0.248325  | 3.295493  | H        | 3.435178  | -1.742013 | 1.134069  |
| C | -2.051710 | 1.465532  | 3.319386  | C        | 5.060564  | -2.938771 | 0.314074  |
| H | -1.962679 | 2.015625  | 4.267275  | C        | 5.959556  | -3.111646 | -0.755635 |
| C | -1.453414 | 1.949554  | 2.152061  | H        | 6.663971  | -3.958117 | -0.755504 |
| H | -0.909995 | 2.902665  | 2.192262  | C        | 5.948158  | -2.201195 | -1.827443 |
| C | -1.513824 | 1.218277  | 0.948108  | H        | 6.647518  | -2.330898 | -2.668981 |
| C | -1.641015 | 1.567994  | -1.916905 | C        | 5.043889  | -1.128362 | -1.834295 |
| C | -2.949532 | 2.093663  | -1.861796 | H        | 5.017579  | -0.421939 | -2.678726 |
| H | -3.294976 | 2.606761  | -0.951270 | C        | 3.100280  | 3.823559  | -1.700238 |
| C | -3.818081 | 1.928307  | -2.950867 | H        | 3.178362  | 3.564890  | -2.775628 |
| H | -4.842209 | 2.330105  | -2.900498 | H        | 3.657484  | 4.764545  | -1.520727 |
| C | -3.390365 | 1.230509  | -4.094949 | H        | 2.034504  | 3.974942  | -1.451913 |
| H | -4.080461 | 1.084812  | -4.940025 | H        | 5.060164  | -3.650189 | 1.154512  |
| C | -2.089081 | 0.702557  | -4.151194 | O        | 3.723862  | 3.159463  | 0.536406  |
| H | -1.757837 | 0.142415  | -5.039425 | C        | 3.658191  | 2.252560  | 1.549394  |
| C | -1.214402 | 0.874563  | -3.066741 | O        | 2.749416  | 2.240909  | 2.360339  |
| H | -0.197702 | 0.448108  | -3.082327 | O        | 4.690143  | 1.396659  | 1.695980  |
| C | -0.258951 | 3.536521  | -0.296633 | C        | 5.896390  | 1.523491  | 0.927969  |
| C | 0.619289  | 3.976540  | 0.720467  | H        | 6.702187  | 1.093667  | 1.551636  |
| H | 1.148859  | 3.250048  | 1.358027  | H        | 5.817824  | 0.936755  | -0.009207 |
| C | 0.877212  | 5.345253  | 0.889303  | H        | 6.117650  | 2.585526  | 0.704379  |
| H | 1.568864  | 5.667246  | 1.683287  | C        | 3.686325  | 2.686952  | -0.879311 |
| C | 0.290964  | 6.289728  | 0.028182  | H        | 4.741369  | 2.514178  | -1.190695 |
| H | 0.507010  | 7.362842  | 0.151243  |          |           |           |           |
| C | -0.557583 | 5.854848  | -1.004396 | (R)-IM1B |           |           |           |
| H | -1.007308 | 6.585400  | -1.695570 | Ni       | -1.308321 | 0.278549  | -0.139500 |
| C | -0.837137 | 4.486147  | -1.165296 | P        | 0.350851  | 1.646858  | 0.026132  |
| H | -1.496765 | 4.159080  | -1.982074 | P        | -0.205553 | -1.574340 | -0.168479 |
| O | -3.537566 | -1.667325 | 1.987302  | C        | 0.029199  | 3.353467  | -0.600164 |
| C | -4.886467 | -1.782312 | 2.449455  | C        | -0.784744 | 3.470576  | -1.749757 |
| H | -5.403367 | -2.468552 | 1.749041  | H        | -1.164882 | 2.557143  | -2.235025 |
| H | -5.400479 | -0.799086 | 2.440561  | C        | -1.149086 | 4.731596  | -2.241048 |
| H | -4.930789 | -2.202368 | 3.474794  | H        | -1.795863 | 4.806071  | -3.128594 |
| O | -4.562436 | -0.059662 | -0.413106 | C        | -0.723742 | 5.894860  | -1.575458 |
| C | -5.968001 | -0.268349 | -0.542090 | H        | -1.030357 | 6.885647  | -1.945492 |



|   |           |           |           |    |           |           |           |
|---|-----------|-----------|-----------|----|-----------|-----------|-----------|
| C | 0.076573  | 5.787166  | -0.426403 | H  | -2.232243 | -1.940350 | 1.823820  |
| H | 0.402570  | 6.694220  | 0.106825  | C  | -2.822355 | -4.031015 | 1.834743  |
| C | 0.454079  | 4.523432  | 0.059593  | H  | -3.594162 | -3.876204 | 2.603452  |
| H | 1.061886  | 4.451229  | 0.973253  | C  | -2.649407 | -5.291948 | 1.237447  |
| C | 1.099087  | 1.896343  | 1.686602  | H  | -3.263804 | -6.145827 | 1.564289  |
| C | 0.382192  | 1.414400  | 2.800864  | C  | -1.707368 | -5.455039 | 0.206252  |
| H | -0.588604 | 0.918086  | 2.635637  | H  | -1.578292 | -6.437721 | -0.274726 |
| C | 0.920560  | 1.537587  | 4.091776  | C  | -0.934325 | -4.364103 | -0.226987 |
| H | 0.364647  | 1.144250  | 4.956992  | H  | -0.215583 | -4.498213 | -1.048423 |
| C | 2.174243  | 2.145548  | 4.274900  | O  | 4.385583  | 0.312426  | 1.309984  |
| H | 2.602803  | 2.229399  | 5.285357  | C  | 5.712145  | 0.188357  | 1.822309  |
| C | 2.891821  | 2.628460  | 3.165548  | H  | 6.377388  | 0.584183  | 1.030066  |
| H | 3.882296  | 3.088445  | 3.307249  | H  | 5.974908  | -0.869890 | 2.026501  |
| C | 2.360033  | 2.501823  | 1.873550  | H  | 5.852441  | 0.781011  | 2.747936  |
| H | 2.941387  | 2.837763  | 1.001456  | O  | 4.201736  | -1.675328 | -1.010644 |
| C | 1.782167  | 1.084711  | -1.009444 | C  | 5.627571  | -1.737130 | -1.105424 |
| C | 2.012712  | 1.655638  | -2.277872 | H  | 5.980490  | -2.261509 | -0.195095 |
| H | 1.439111  | 2.537381  | -2.596920 | H  | 6.074511  | -0.722182 | -1.137016 |
| C | 2.949965  | 1.095875  | -3.152341 | H  | 5.951678  | -2.301306 | -2.003176 |
| H | 3.103111  | 1.512514  | -4.158515 | Cl | 4.244878  | -0.672973 | 4.352251  |
| C | 3.691716  | -0.028287 | -2.759716 | Cl | 4.756085  | -0.778523 | -3.936026 |
| C | 3.532248  | -0.581897 | -1.468075 | C  | -4.281265 | -0.930337 | -0.613895 |
| C | 2.546314  | -0.037944 | -0.602333 | C  | -3.173391 | 0.042214  | -0.397225 |
| C | 2.354285  | -0.700899 | 0.727278  | C  | -2.917979 | 1.306568  | -0.196515 |
| C | 3.362518  | -0.487521 | 1.712001  | C  | -3.370733 | 2.680337  | -0.169503 |
| C | 3.174060  | -1.034358 | 3.004401  | C  | -2.836281 | 3.602401  | 0.764721  |
| C | 2.061853  | -1.847245 | 3.276771  | H  | -2.091799 | 3.242438  | 1.490765  |
| H | 1.951546  | -2.269302 | 4.286317  | C  | -3.228726 | 4.946085  | 0.748682  |
| C | 1.100848  | -2.089588 | 2.292435  | C  | -4.156316 | 5.402674  | -0.206334 |
| H | 0.236120  | -2.725536 | 2.528605  | H  | -4.452042 | 6.463327  | -0.228017 |
| C | 1.221257  | -1.500313 | 1.016911  | C  | -4.698383 | 4.498194  | -1.137593 |
| C | 0.579856  | -2.046939 | -1.762948 | H  | -5.424146 | 4.849205  | -1.888799 |
| C | 1.610744  | -3.006448 | -1.851367 | C  | -4.315128 | 3.149082  | -1.118619 |
| H | 1.988851  | -3.490868 | -0.938336 | H  | -4.723783 | 2.441172  | -1.856587 |
| C | 2.194834  | -3.297425 | -3.093065 | H  | -2.794184 | 5.649439  | 1.475954  |
| H | 3.014261  | -4.030051 | -3.153475 | O  | -4.562482 | -1.521668 | 0.710129  |
| C | 1.759336  | -2.629127 | -4.251365 | C  | -5.720653 | -2.136268 | 0.974490  |
| H | 2.233068  | -2.845146 | -5.221342 | O  | -5.935618 | -2.701557 | 2.030727  |
| C | 0.737184  | -1.668324 | -4.166580 | O  | -6.609512 | -2.046771 | -0.049693 |
| H | 0.406562  | -1.131931 | -5.069789 | C  | -7.877511 | -2.678355 | 0.188494  |
| C | 0.147855  | -1.377672 | -2.925681 | H  | -8.469132 | -2.524697 | -0.731956 |
| H | -0.639498 | -0.610942 | -2.834980 | H  | -7.746068 | -3.761338 | 0.385979  |
| C | -1.099364 | -3.097459 | 0.371664  | H  | -8.390043 | -2.217518 | 1.056818  |
| C | -2.054736 | -2.940114 | 1.399096  | C  | -3.933491 | -2.025278 | -1.618326 |

|          |           |           |           |    |           |           |           |
|----------|-----------|-----------|-----------|----|-----------|-----------|-----------|
| H        | -3.043760 | -2.586888 | -1.275150 | H  | -3.474068 | 3.164174  | 2.678764  |
| H        | -4.783426 | -2.721067 | -1.758549 | C  | -2.159741 | 2.526326  | 1.065777  |
| H        | -3.692323 | -1.560631 | -2.595711 | H  | -1.717368 | 3.524127  | 0.945209  |
| H        | -5.199784 | -0.390509 | -0.929173 | C  | -1.715733 | 1.452430  | 0.266576  |
| (R)-IM1D |           |           |           | C  | -0.826332 | 0.901381  | -2.426860 |
| Ni       | 1.578493  | 0.680059  | 0.013426  | C  | -2.076389 | 1.264522  | -2.974699 |
| P        | 0.535011  | -1.052804 | 0.996609  | H  | -2.714789 | 1.989962  | -2.447782 |
| P        | -0.252590 | 1.620347  | -0.839176 | C  | -2.511207 | 0.680338  | -4.173673 |
| C        | 1.656776  | -2.447990 | 1.434062  | H  | -3.487990 | 0.962951  | -4.596643 |
| C        | 3.011994  | -2.107327 | 1.635695  | C  | -1.709954 | -0.274248 | -4.825951 |
| H        | 3.316074  | -1.052681 | 1.539622  | H  | -2.062654 | -0.745114 | -5.756199 |
| C        | 3.952459  | -3.101521 | 1.944619  | C  | -0.463972 | -0.633478 | -4.284280 |
| H        | 5.008983  | -2.826316 | 2.085606  | H  | 0.163237  | -1.385466 | -4.787393 |
| C        | 3.550961  | -4.443941 | 2.051434  | C  | -0.020018 | -0.043863 | -3.090675 |
| H        | 4.292598  | -5.227232 | 2.273925  | H  | 0.947892  | -0.324870 | -2.647895 |
| C        | 2.197182  | -4.785239 | 1.881766  | C  | -0.055505 | 3.410097  | -1.175916 |
| H        | 1.874203  | -5.833533 | 1.982049  | C  | 0.329719  | 4.264001  | -0.112856 |
| C        | 1.250398  | -3.791329 | 1.583399  | H  | 0.505002  | 3.839600  | 0.887493  |
| H        | 0.194375  | -4.072628 | 1.456691  | C  | 0.575709  | 5.623110  | -0.357280 |
| C        | -0.433678 | -0.807559 | 2.548795  | H  | 0.877547  | 6.274719  | 0.477469  |
| C        | -0.349010 | 0.424683  | 3.227294  | C  | 0.479997  | 6.140387  | -1.661520 |
| H        | 0.284484  | 1.223159  | 2.810754  | H  | 0.688484  | 7.204988  | -1.851856 |
| C        | -1.100852 | 0.626921  | 4.396844  | C  | 0.131181  | 5.288859  | -2.724862 |
| H        | -1.044551 | 1.596769  | 4.915586  | H  | 0.067107  | 5.682999  | -3.751449 |
| C        | -1.931917 | -0.390930 | 4.892760  | C  | -0.139332 | 3.931280  | -2.486398 |
| H        | -2.530087 | -0.222524 | 5.801611  | H  | -0.409417 | 3.273783  | -3.325578 |
| C        | -2.013553 | -1.621108 | 4.215722  | O  | -3.865361 | -1.269152 | 1.476319  |
| H        | -2.678781 | -2.415313 | 4.588779  | C  | -5.281319 | -1.465133 | 1.409405  |
| C        | -1.266549 | -1.831405 | 3.048250  | H  | -5.443805 | -2.410987 | 0.854465  |
| H        | -1.364786 | -2.781944 | 2.503142  | H  | -5.777791 | -0.635305 | 0.865491  |
| C        | -0.733491 | -1.748973 | -0.158020 | H  | -5.726585 | -1.551528 | 2.421305  |
| C        | -0.470127 | -2.890591 | -0.944164 | O  | -3.939509 | -0.625001 | -1.493362 |
| H        | 0.427452  | -3.494231 | -0.762912 | C  | -5.153330 | -0.987170 | -2.148832 |
| C        | -1.345394 | -3.269701 | -1.963320 | H  | -5.909355 | -0.269625 | -1.775606 |
| H        | -1.123166 | -4.139931 | -2.597743 | H  | -5.467133 | -2.019301 | -1.892781 |
| C        | -2.515682 | -2.536091 | -2.217046 | H  | -5.068951 | -0.892544 | -3.249355 |
| C        | -2.849624 | -1.427212 | -1.402047 | Cl | -4.892526 | 0.841693  | 3.495863  |
| C        | -1.927985 | -1.023477 | -0.387037 | Cl | -3.465037 | -3.042874 | -3.609497 |
| C        | -2.314913 | 0.175002  | 0.425481  | C  | 3.040160  | 1.300308  | -1.090528 |
| C        | -3.353098 | -0.012218 | 1.376260  | C  | 2.878741  | -0.035700 | -1.038705 |
| C        | -3.735762 | 1.070380  | 2.199767  | C  | 3.588868  | -1.253360 | -1.331388 |
| C        | -3.152806 | 2.335437  | 2.031418  | C  | 2.918194  | -2.473614 | -1.586968 |
|          |           |           |           | H  | 1.823462  | -2.460366 | -1.652854 |
|          |           |           |           | C  | 3.634452  | -3.663483 | -1.750926 |

|          |           |           |           |   |           |           |           |
|----------|-----------|-----------|-----------|---|-----------|-----------|-----------|
| C        | 5.037788  | -3.663653 | -1.638630 | C | -1.155002 | -3.308215 | 3.223175  |
| H        | 5.600845  | -4.604261 | -1.741434 | H | -1.815896 | -4.168316 | 3.414779  |
| C        | 5.719727  | -2.455070 | -1.399389 | C | -0.804695 | -2.977410 | 1.906082  |
| H        | 6.818228  | -2.449865 | -1.317361 | H | -1.208249 | -3.560279 | 1.063917  |
| C        | 5.009701  | -1.254436 | -1.269083 | C | -1.120628 | -1.529264 | -0.964896 |
| H        | 5.533978  | -0.307561 | -1.069295 | C | -1.194875 | -2.237856 | -2.181178 |
| H        | 3.095888  | -4.603665 | -1.947828 | H | -0.328387 | -2.810167 | -2.540263 |
| O        | 3.035311  | 3.379575  | 2.574988  | C | -2.359198 | -2.207311 | -2.956273 |
| C        | 2.727239  | 2.316936  | 2.034574  | H | -2.406959 | -2.727115 | -3.924166 |
| O        | 1.589630  | 2.023791  | 1.490151  | C | -3.475802 | -1.484342 | -2.512420 |
| O        | 3.632235  | 1.262294  | 1.958095  | C | -3.453960 | -0.818080 | -1.265699 |
| C        | 4.944236  | 1.543324  | 2.440415  | C | -2.257427 | -0.820508 | -0.501909 |
| H        | 5.527368  | 0.610896  | 2.312070  | C | -2.267104 | -0.066931 | 0.792942  |
| H        | 5.418016  | 2.364378  | 1.861452  | C | -2.997211 | -0.656856 | 1.868772  |
| H        | 4.930713  | 1.836984  | 3.510899  | C | -2.968553 | -0.020494 | 3.133133  |
| C        | 3.736375  | 2.378739  | -1.534625 | C | -2.308245 | 1.208926  | 3.291227  |
| H        | 4.537730  | 2.176984  | -2.275728 | H | -2.311602 | 1.683453  | 4.283153  |
| C        | 3.520446  | 3.803935  | -1.132397 | C | -1.637535 | 1.804531  | 2.221933  |
| H        | 2.917784  | 4.353631  | -1.893459 | H | -1.125668 | 2.762975  | 2.377446  |
| H        | 2.979216  | 3.883090  | -0.171366 | C | -1.591055 | 1.165197  | 0.967017  |
| H        | 4.486434  | 4.345360  | -1.048464 | C | -1.449976 | 1.705781  | -1.893478 |
|          |           |           |           | C | -2.790695 | 2.143884  | -1.945054 |
| (R)-TS1A |           |           |           | H | -3.274883 | 2.533169  | -1.036660 |
| Ni       | 1.393812  | 0.589890  | -0.359427 | C | -3.516500 | 2.040409  | -3.140245 |
| P        | 0.484367  | -1.369772 | -0.049396 | H | -4.568675 | 2.362166  | -3.170339 |
| P        | -0.456554 | 1.805137  | -0.352678 | C | -2.911118 | 1.497578  | -4.288131 |
| C        | 1.470148  | -2.782867 | -0.710207 | H | -3.488892 | 1.400344  | -5.220099 |
| C        | 2.087076  | -2.613498 | -1.970839 | C | -1.576629 | 1.060322  | -4.239815 |
| H        | 1.942443  | -1.669454 | -2.520150 | H | -1.105229 | 0.623301  | -5.133884 |
| C        | 2.912592  | -3.613669 | -2.502221 | C | -0.845317 | 1.166146  | -3.045599 |
| H        | 3.395329  | -3.461597 | -3.479685 | H | 0.197129  | 0.812562  | -2.984184 |
| C        | 3.152741  | -4.789356 | -1.769009 | C | -0.342553 | 3.618296  | -0.029016 |
| H        | 3.819869  | -5.565881 | -2.174507 | C | 0.435488  | 4.043503  | 1.072870  |
| C        | 2.553143  | -4.960448 | -0.510724 | H | 0.954822  | 3.289915  | 1.691233  |
| H        | 2.746883  | -5.873415 | 0.074185  | C | 0.603274  | 5.413530  | 1.326713  |
| C        | 1.713468  | -3.964380 | 0.017309  | H | 1.219884  | 5.728818  | 2.182904  |
| H        | 1.264852  | -4.099732 | 1.012210  | C | 0.026182  | 6.372098  | 0.475558  |
| C        | 0.035151  | -1.868989 | 1.658979  | H | 0.171491  | 7.446766  | 0.669474  |
| C        | 0.518301  | -1.089973 | 2.730829  | C | -0.721604 | 5.951921  | -0.638081 |
| H        | 1.150750  | -0.204497 | 2.538365  | H | -1.163124 | 6.694892  | -1.321206 |
| C        | 0.152276  | -1.425385 | 4.045772  | C | -0.909640 | 4.582043  | -0.890968 |
| H        | 0.513118  | -0.804761 | 4.880758  | H | -1.488618 | 4.268748  | -1.771397 |
| C        | -0.680137 | -2.529303 | 4.294568  | O | -3.595144 | -1.833298 | 1.545102  |
| H        | -0.973009 | -2.778443 | 5.326272  | C | -4.690522 | -2.393585 | 2.265518  |

|          |           |           |           |   |           |           |           |
|----------|-----------|-----------|-----------|---|-----------|-----------|-----------|
| H        | -5.157914 | -3.118553 | 1.570896  | H | 1.371846  | -3.287265 | -1.571397 |
| H        | -5.435866 | -1.622233 | 2.547604  | C | 1.965591  | -5.148959 | -0.614349 |
| H        | -4.354194 | -2.925332 | 3.177517  | H | 2.287487  | -5.617528 | -1.556635 |
| O        | -4.490537 | -0.087445 | -0.772589 | C | 2.110021  | -5.836137 | 0.604035  |
| C        | -5.785528 | -0.684366 | -0.649332 | H | 2.536903  | -6.851050 | 0.616554  |
| H        | -6.226662 | -0.293227 | 0.289252  | C | 1.729729  | -5.216706 | 1.805932  |
| H        | -5.714937 | -1.789447 | -0.584601 | H | 1.856605  | -5.744773 | 2.764048  |
| H        | -6.438657 | -0.413616 | -1.503652 | C | 1.198380  | -3.915784 | 1.795793  |
| Cl       | -3.668983 | -0.724720 | 4.586290  | H | 0.923193  | -3.429945 | 2.743047  |
| Cl       | -4.869869 | -1.355065 | -3.568224 | C | 0.380096  | -0.810678 | 2.143875  |
| C        | 2.970152  | 1.603062  | -0.852733 | C | 1.127474  | 0.364255  | 2.367940  |
| C        | 3.200620  | 0.303556  | -0.692535 | H | 1.700342  | 0.841824  | 1.553965  |
| C        | 4.219030  | -0.715154 | -0.776912 | C | 1.084905  | 0.993430  | 3.622841  |
| C        | 4.288686  | -1.735145 | 0.204672  | H | 1.628672  | 1.943977  | 3.744837  |
| H        | 3.571663  | -1.710158 | 1.036791  | C | 0.318062  | 0.437533  | 4.660304  |
| C        | 5.266214  | -2.731386 | 0.118400  | H | 0.276000  | 0.934648  | 5.641814  |
| C        | 6.173949  | -2.744094 | -0.958315 | C | -0.430824 | -0.733693 | 4.437438  |
| H        | 6.928616  | -3.542506 | -1.034235 | H | -1.056610 | -1.150755 | 5.242124  |
| C        | 6.114714  | -1.735289 | -1.936814 | C | -0.415260 | -1.352174 | 3.178412  |
| H        | 6.825566  | -1.740168 | -2.778325 | H | -1.055222 | -2.226770 | 2.985625  |
| C        | 5.154320  | -0.717570 | -1.842807 | C | -1.398053 | -1.795955 | 0.078251  |
| H        | 5.093839  | 0.073168  | -2.606490 | C | -1.828619 | -3.033222 | -0.443580 |
| C        | 3.030179  | 4.143492  | -1.113252 | H | -1.128837 | -3.877686 | -0.510690 |
| H        | 3.346620  | 4.369151  | -2.158189 | C | -3.136772 | -3.190039 | -0.909723 |
| H        | 3.405768  | 4.962542  | -0.470201 | H | -3.466995 | -4.138319 | -1.357939 |
| H        | 1.927025  | 4.118564  | -1.080964 | C | -4.036027 | -2.114976 | -0.848455 |
| H        | 5.312223  | -3.516850 | 0.888269  | C | -3.654058 | -0.885578 | -0.261626 |
| O        | 3.573462  | 3.085974  | 1.375118  | C | -2.315094 | -0.721446 | 0.184645  |
| C        | 3.179713  | 1.987526  | 1.901801  | C | -1.941423 | 0.605798  | 0.771386  |
| O        | 2.008993  | 1.672255  | 2.210231  | C | -2.445363 | 0.882048  | 2.076835  |
| O        | 4.121321  | 0.995868  | 2.130492  | C | -2.058627 | 2.082882  | 2.717519  |
| C        | 5.482640  | 1.266115  | 1.794566  | C | -1.256378 | 3.018780  | 2.047475  |
| H        | 6.106670  | 0.607450  | 2.429660  | H | -0.948897 | 3.934399  | 2.571525  |
| H        | 5.683577  | 1.017755  | 0.729692  | C | -0.804773 | 2.763199  | 0.752334  |
| H        | 5.734950  | 2.330132  | 1.972217  | H | -0.162505 | 3.504704  | 0.263613  |
| C        | 3.624352  | 2.835415  | -0.719209 | C | -1.122164 | 1.552255  | 0.106027  |
| H        | 4.728764  | 2.802327  | -0.667257 | C | -1.503432 | 0.269625  | -2.494834 |
|          |           |           |           | C | -2.784460 | 0.829955  | -2.688924 |
| (R)-TS1B |           |           |           | H | -3.056787 | 1.764714  | -2.176050 |
| Ni       | 1.456542  | -0.188865 | -0.864958 | C | -3.720385 | 0.173544  | -3.500527 |
| P        | 0.387179  | -1.513658 | 0.451093  | H | -4.725318 | 0.602471  | -3.633060 |
| P        | -0.234320 | 1.094409  | -1.455130 | C | -3.385755 | -1.045001 | -4.119254 |
| C        | 1.042312  | -3.226686 | 0.577622  | H | -4.128409 | -1.566486 | -4.742457 |
| C        | 1.444340  | -3.848179 | -0.625706 | C | -2.113320 | -1.607753 | -3.923620 |

|    |           |           |           |          |           |           |           |
|----|-----------|-----------|-----------|----------|-----------|-----------|-----------|
| H  | -1.855200 | -2.569365 | -4.393812 | C        | 3.939258  | 5.718891  | 1.215050  |
| C  | -1.172511 | -0.950719 | -3.113966 | H        | 4.591230  | 6.310148  | 0.542864  |
| H  | -0.177336 | -1.387311 | -2.926638 | H        | 3.018191  | 6.295588  | 1.446406  |
| C  | 0.034977  | 2.692799  | -2.343653 | H        | 4.466282  | 5.522186  | 2.172711  |
| C  | 0.966026  | 3.604545  | -1.798126 | C        | 3.966933  | 2.657801  | -2.149100 |
| H  | 1.543026  | 3.314911  | -0.904576 | H        | 3.150612  | 2.469436  | -2.869608 |
| C  | 1.191471  | 4.845186  | -2.415354 | H        | 3.901993  | 3.690538  | -1.753242 |
| H  | 1.910720  | 5.544555  | -1.961364 | H        | 4.942653  | 2.573575  | -2.681693 |
| C  | 0.525319  | 5.175123  | -3.607742 | H        | 4.716184  | 1.846908  | -0.230615 |
| H  | 0.707260  | 6.145208  | -4.096795 |          |           |           |           |
| C  | -0.362697 | 4.249567  | -4.183601 | (R)-TS1D |           |           |           |
| H  | -0.873394 | 4.488118  | -5.130061 | Ni       | 1.391904  | 0.719198  | -0.242513 |
| C  | -0.612237 | 3.016697  | -3.556927 | P        | 0.645543  | -1.131042 | 0.590058  |
| H  | -1.312842 | 2.308189  | -4.020583 | P        | -0.546243 | 1.739024  | -0.467613 |
| O  | -3.198798 | -0.112818 | 2.618817  | C        | 1.838394  | -2.524096 | 0.771746  |
| C  | -4.292198 | 0.147937  | 3.499243  | C        | 3.139032  | -2.154736 | 1.179546  |
| H  | -4.996380 | -0.696874 | 3.364895  | H        | 3.365578  | -1.089658 | 1.345884  |
| H  | -4.806255 | 1.097223  | 3.243560  | C        | 4.129728  | -3.129590 | 1.359038  |
| H  | -3.966360 | 0.187919  | 4.557519  | H        | 5.143518  | -2.827742 | 1.663624  |
| O  | -4.450516 | 0.212578  | -0.176609 | C        | 3.834455  | -4.484587 | 1.125313  |
| C  | -5.787177 | 0.110197  | 0.323734  | H        | 4.617906  | -5.249347 | 1.244750  |
| H  | -5.978130 | 1.039653  | 0.896061  | C        | 2.535076  | -4.861338 | 0.744779  |
| H  | -5.900800 | -0.763177 | 0.997926  | H        | 2.294359  | -5.923219 | 0.577337  |
| H  | -6.524149 | 0.028298  | -0.500215 | C        | 1.535148  | -3.886958 | 0.578852  |
| Cl | -2.466779 | 2.427686  | 4.391033  | H        | 0.518545  | -4.194794 | 0.291079  |
| Cl | -5.604981 | -2.302746 | -1.610090 | C        | -0.099010 | -1.137187 | 2.276591  |
| C  | 3.966974  | 1.681823  | -1.024015 | C        | 0.091172  | -0.004057 | 3.090951  |
| C  | 3.363632  | 0.443523  | -1.053955 | H        | 0.672949  | 0.847685  | 2.701825  |
| C  | 3.201373  | -0.820142 | -0.738865 | C        | -0.456340 | 0.016785  | 4.385585  |
| C  | 3.965722  | -2.046054 | -0.571999 | H        | -0.316794 | 0.905969  | 5.020525  |
| C  | 4.143364  | -2.597356 | 0.719573  | C        | -1.184931 | -1.084108 | 4.865602  |
| H  | 3.704764  | -2.081748 | 1.586754  | H        | -1.626713 | -1.056479 | 5.873866  |
| C  | 4.852795  | -3.793890 | 0.884039  | C        | -1.358982 | -2.220998 | 4.054408  |
| C  | 5.396070  | -4.458945 | -0.230357 | H        | -1.939564 | -3.080373 | 4.424034  |
| H  | 5.946466  | -5.403224 | -0.096991 | C        | -0.811378 | -2.252203 | 2.764583  |
| C  | 5.227081  | -3.914240 | -1.515191 | H        | -0.968392 | -3.131391 | 2.121463  |
| H  | 5.650324  | -4.428036 | -2.392997 | C        | -0.689611 | -1.708674 | -0.540984 |
| C  | 4.513504  | -2.718773 | -1.689656 | C        | -0.382232 | -2.555864 | -1.628270 |
| H  | 4.364629  | -2.294505 | -2.694450 | H        | 0.606843  | -3.026376 | -1.702337 |
| H  | 4.974686  | -4.216586 | 1.893237  | C        | -1.322781 | -2.791921 | -2.630697 |
| O  | 2.628038  | 2.524842  | 0.554213  | H        | -1.076485 | -3.427743 | -3.493400 |
| C  | 2.853037  | 3.591690  | 1.232742  | C        | -2.597199 | -2.202003 | -2.574422 |
| O  | 2.445440  | 3.872917  | 2.367606  | C        | -2.953485 | -1.378357 | -1.479321 |
| O  | 3.639483  | 4.507382  | 0.523033  | C        | -1.968828 | -1.107615 | -0.479553 |

|    |           |           |           |          |           |           |           |
|----|-----------|-----------|-----------|----------|-----------|-----------|-----------|
| C  | -2.361759 | -0.158300 | 0.611456  | C        | 3.843279  | -0.771321 | -1.526829 |
| C  | -3.254782 | -0.654311 | 1.596711  | C        | 3.352707  | -2.006223 | -2.012584 |
| C  | -3.638916 | 0.184863  | 2.666017  | H        | 2.275636  | -2.096453 | -2.208461 |
| C  | -3.211922 | 1.519720  | 2.710453  | C        | 4.216094  | -3.087384 | -2.224607 |
| H  | -3.536383 | 2.159545  | 3.543915  | C        | 5.588205  | -2.959906 | -1.939458 |
| C  | -2.357359 | 2.012731  | 1.719456  | H        | 6.264299  | -3.817152 | -2.083142 |
| H  | -2.031619 | 3.060090  | 1.774548  | C        | 6.094080  | -1.733508 | -1.470100 |
| C  | -1.893070 | 1.180636  | 0.679818  | H        | 7.168754  | -1.627496 | -1.252296 |
| C  | -1.269450 | 1.356218  | -2.117376 | C        | 5.234278  | -0.642217 | -1.279055 |
| C  | -2.612446 | 1.657446  | -2.430111 | H        | 5.621226  | 0.319152  | -0.907160 |
| H  | -3.255362 | 2.136609  | -1.675825 | H        | 3.815396  | -4.044081 | -2.593772 |
| C  | -3.132543 | 1.316139  | -3.687547 | O        | 4.083267  | 2.771775  | 0.723535  |
| H  | -4.182756 | 1.546563  | -3.926634 | C        | 3.305925  | 2.116280  | 1.535421  |
| C  | -2.320798 | 0.664584  | -4.634206 | O        | 2.063796  | 2.126228  | 1.574084  |
| H  | -2.737272 | 0.380808  | -5.612895 | O        | 3.944637  | 1.285829  | 2.423710  |
| C  | -0.983730 | 0.363213  | -4.324312 | C        | 5.365674  | 1.145048  | 2.317040  |
| H  | -0.349882 | -0.157456 | -5.058993 | H        | 5.673894  | 0.518945  | 3.175621  |
| C  | -0.456515 | 0.710904  | -3.070366 | H        | 5.646429  | 0.637028  | 1.370494  |
| H  | 0.583365  | 0.468046  | -2.798168 | H        | 5.877991  | 2.127279  | 2.361191  |
| C  | -0.631140 | 3.574415  | -0.355404 | C        | 3.498457  | 2.857302  | -1.015500 |
| C  | -0.134694 | 4.184858  | 0.822778  | H        | 4.536164  | 2.857965  | -1.403251 |
| H  | 0.281523  | 3.557085  | 1.623862  | C        | 2.796670  | 4.179630  | -1.099469 |
| C  | -0.103996 | 5.583398  | 0.937973  | H        | 2.502932  | 4.362875  | -2.156216 |
| H  | 0.282520  | 6.043772  | 1.860882  | H        | 1.876439  | 4.173451  | -0.490486 |
| C  | -0.532925 | 6.392539  | -0.129675 | H        | 3.455728  | 5.006365  | -0.772231 |
| H  | -0.495924 | 7.489859  | -0.043097 |          |           |           |           |
| C  | -0.991502 | 5.792238  | -1.314924 | (R)-IM2A |           |           |           |
| H  | -1.313844 | 6.418155  | -2.162257 | Ni       | 1.454345  | 0.778537  | 0.061955  |
| C  | -1.045507 | 4.392200  | -1.427885 | P        | 0.635615  | -1.294153 | -0.170547 |
| H  | -1.404008 | 3.934177  | -2.361383 | P        | -0.501688 | 1.851035  | 0.019782  |
| O  | -3.620493 | -1.961614 | 1.482896  | C        | 1.765646  | -2.448333 | -1.059373 |
| C  | -5.007947 | -2.309998 | 1.510080  | C        | 2.358619  | -2.001150 | -2.263792 |
| H  | -5.137848 | -3.149764 | 0.798141  | H        | 2.112937  | -0.999580 | -2.650280 |
| H  | -5.642559 | -1.459155 | 1.187051  | C        | 3.280092  | -2.803893 | -2.949631 |
| H  | -5.326078 | -2.633250 | 2.522167  | H        | 3.735378  | -2.437063 | -3.882254 |
| O  | -4.129197 | -0.731320 | -1.274865 | C        | 3.647555  | -4.056723 | -2.426908 |
| C  | -5.368288 | -1.118145 | -1.864862 | H        | 4.386605  | -4.679915 | -2.953980 |
| H  | -6.148932 | -0.627775 | -1.251322 | C        | 3.079991  | -4.500359 | -1.221470 |
| H  | -5.513335 | -2.217220 | -1.834409 | H        | 3.371689  | -5.474881 | -0.799078 |
| H  | -5.452189 | -0.768092 | -2.912669 | C        | 2.142019  | -3.704221 | -0.541384 |
| Cl | -4.585776 | -0.444870 | 4.000769  | H        | 1.711935  | -4.057565 | 0.407014  |
| Cl | -3.648262 | -2.488855 | -3.957695 | C        | 0.064963  | -2.258444 | 1.287085  |
| C  | 2.808711  | 1.626198  | -1.177628 | C        | 0.342789  | -1.756764 | 2.574776  |
| C  | 2.952597  | 0.322001  | -1.201599 | H        | 0.875425  | -0.796479 | 2.663961  |

|   |           |           |           |          |           |           |           |
|---|-----------|-----------|-----------|----------|-----------|-----------|-----------|
| C | -0.114912 | -2.453457 | 3.705448  | C        | -1.267761 | 4.609080  | 0.077799  |
| H | 0.079295  | -2.046762 | 4.710079  | H        | -1.908790 | 4.395748  | -0.789069 |
| C | -0.834560 | -3.650989 | 3.557137  | O        | -3.477643 | -2.239240 | 1.003306  |
| H | -1.197275 | -4.190372 | 4.445975  | C        | -4.426093 | -3.111725 | 1.610288  |
| C | -1.105033 | -4.155042 | 2.271157  | H        | -4.777263 | -3.769220 | 0.791432  |
| H | -1.671391 | -5.092399 | 2.152446  | H        | -5.288128 | -2.556359 | 2.032030  |
| C | -0.668030 | -3.456301 | 1.135803  | H        | -3.963662 | -3.730741 | 2.404161  |
| H | -0.909165 | -3.830044 | 0.128562  | O        | -4.362787 | -0.159248 | -0.997314 |
| C | -0.882843 | -1.314699 | -1.240892 | C        | -5.590020 | -0.897516 | -1.021788 |
| C | -0.844081 | -1.767157 | -2.575423 | H        | -6.118375 | -0.663512 | -0.076306 |
| H | 0.074878  | -2.208445 | -2.983598 | H        | -5.398284 | -1.989021 | -1.068573 |
| C | -1.964531 | -1.652609 | -3.405480 | H        | -6.224208 | -0.601901 | -1.882424 |
| H | -1.921742 | -1.969416 | -4.457667 | Cl       | -3.765026 | -1.717605 | 4.217040  |
| C | -3.154027 | -1.108418 | -2.901221 | Cl       | -4.500780 | -0.853972 | -3.993571 |
| C | -3.245987 | -0.709803 | -1.548672 | C        | 2.697910  | 1.999778  | -0.790938 |
| C | -2.094903 | -0.789701 | -0.723415 | C        | 3.149030  | 0.746875  | -0.580506 |
| C | -2.224199 | -0.304526 | 0.687252  | C        | 4.275218  | -0.116996 | -0.797791 |
| C | -2.961302 | -1.128793 | 1.591190  | C        | 4.453634  | -1.280932 | -0.004375 |
| C | -3.025188 | -0.739690 | 2.951575  | H        | 3.743764  | -1.459464 | 0.813762  |
| C | -2.436039 | 0.465229  | 3.372948  | C        | 5.523645  | -2.144779 | -0.254601 |
| H | -2.505957 | 0.736679  | 4.436250  | C        | 6.415983  | -1.876571 | -1.310940 |
| C | -1.761917 | 1.291802  | 2.473347  | H        | 7.245983  | -2.570306 | -1.518219 |
| H | -1.306021 | 2.224850  | 2.830128  | C        | 6.251926  | -0.723794 | -2.103310 |
| C | -1.643206 | 0.910548  | 1.121809  | H        | 6.953077  | -0.516565 | -2.926901 |
| C | -1.365012 | 1.988027  | -1.591143 | C        | 5.199617  | 0.161679  | -1.840555 |
| C | -2.736895 | 2.306138  | -1.692362 | H        | 5.052871  | 1.061686  | -2.457100 |
| H | -3.339159 | 2.431905  | -0.780126 | C        | 2.029108  | 4.396265  | -1.344848 |
| C | -3.343437 | 2.404527  | -2.952639 | H        | 2.343376  | 5.122095  | -2.122100 |
| H | -4.418559 | 2.628240  | -3.025247 | H        | 1.957015  | 4.955491  | -0.382394 |
| C | -2.587387 | 2.184087  | -4.118381 | H        | 1.003275  | 4.043369  | -1.569739 |
| H | -3.070229 | 2.245471  | -5.105860 | H        | 5.656274  | -3.045712 | 0.363453  |
| C | -1.223281 | 1.862032  | -4.021447 | O        | 2.806663  | 2.229279  | 3.488464  |
| H | -0.633432 | 1.673824  | -4.932102 | C        | 2.583452  | 1.308641  | 2.696490  |
| C | -0.611584 | 1.763697  | -2.760536 | O        | 1.472112  | 1.070622  | 2.081265  |
| H | 0.452724  | 1.492770  | -2.664636 | O        | 3.567689  | 0.370866  | 2.406459  |
| C | -0.516584 | 3.577549  | 0.682014  | C        | 4.841527  | 0.611231  | 2.999658  |
| C | 0.332708  | 3.889969  | 1.768846  | H        | 5.511478  | -0.188116 | 2.626836  |
| H | 0.944431  | 3.102563  | 2.234778  | H        | 5.244315  | 1.602887  | 2.703881  |
| C | 0.407932  | 5.208051  | 2.247975  | H        | 4.788234  | 0.576511  | 4.108630  |
| H | 1.076194  | 5.428482  | 3.095066  | C        | 2.988340  | 3.254059  | -1.239135 |
| C | -0.344281 | 6.231492  | 1.645779  | H        | 4.040094  | 3.447001  | -1.535576 |
| H | -0.274922 | 7.266050  | 2.017786  |          |           |           |           |
| C | -1.179846 | 5.926592  | 0.557469  | (R)-IM2B |           |           |           |
| H | -1.767389 | 6.720750  | 0.069978  | Ni       | 1.047564  | 1.021182  | -1.088023 |

|   |           |           |           |    |           |           |           |
|---|-----------|-----------|-----------|----|-----------|-----------|-----------|
| P | 0.913532  | -1.038694 | -0.419092 | H  | -5.732816 | 0.300137  | -1.826275 |
| P | -1.014896 | 1.569021  | -0.753970 | C  | -4.331695 | -0.406925 | -3.337666 |
| C | 1.962260  | -2.152230 | -1.442419 | H  | -5.112720 | -0.880118 | -3.952353 |
| C | 1.894670  | -2.002735 | -2.846006 | C  | -2.984773 | -0.487944 | -3.728548 |
| H | 1.247374  | -1.221853 | -3.276835 | H  | -2.706932 | -1.023438 | -4.649580 |
| C | 2.655236  | -2.830719 | -3.684452 | C  | -1.986237 | 0.099805  | -2.934709 |
| H | 2.588083  | -2.712790 | -4.777388 | H  | -0.922538 | 0.023573  | -3.208569 |
| C | 3.515591  | -3.795031 | -3.127987 | C  | -1.452265 | 3.362113  | -0.899141 |
| H | 4.123419  | -4.436902 | -3.784680 | C  | -0.638936 | 4.333508  | -0.268813 |
| C | 3.614086  | -3.919364 | -1.732710 | H  | 0.240294  | 4.004899  | 0.309102  |
| H | 4.308032  | -4.650749 | -1.290337 | C  | -0.923853 | 5.699520  | -0.422163 |
| C | 2.837451  | -3.105756 | -0.889960 | H  | -0.283551 | 6.438394  | 0.084940  |
| H | 2.928211  | -3.201077 | 0.201552  | C  | -2.000252 | 6.121515  | -1.221531 |
| C | 1.287088  | -1.478452 | 1.323046  | H  | -2.216536 | 7.194677  | -1.343604 |
| C | 1.838593  | -0.490295 | 2.155340  | C  | -2.790157 | 5.162498  | -1.876577 |
| H | 2.060511  | 0.505434  | 1.752840  | H  | -3.626555 | 5.477769  | -2.520246 |
| C | 2.091852  | -0.770439 | 3.506420  | C  | -2.520601 | 3.792064  | -1.719811 |
| H | 2.513366  | 0.022395  | 4.142364  | H  | -3.147894 | 3.061137  | -2.247730 |
| C | 1.797678  | -2.041023 | 4.028159  | O  | -1.895443 | -2.087044 | 2.752730  |
| H | 1.987703  | -2.260281 | 5.090576  | C  | -2.196203 | -2.751379 | 3.976932  |
| C | 1.249028  | -3.034262 | 3.194277  | H  | -2.597932 | -3.738655 | 3.676953  |
| H | 1.015326  | -4.030686 | 3.601702  | H  | -2.961224 | -2.205966 | 4.565596  |
| C | 0.981648  | -2.754666 | 1.845086  | H  | -1.289094 | -2.898148 | 4.595611  |
| H | 0.517707  | -3.519268 | 1.202953  | O  | -4.098714 | -1.289046 | 0.836063  |
| C | -0.762236 | -1.806865 | -0.599944 | C  | -4.929044 | -2.144775 | 1.631104  |
| C | -1.024484 | -2.805873 | -1.557301 | H  | -5.111249 | -1.611857 | 2.585472  |
| H | -0.212401 | -3.198135 | -2.184313 | H  | -4.421355 | -3.107194 | 1.845369  |
| C | -2.324297 | -3.291776 | -1.740525 | H  | -5.897415 | -2.346982 | 1.129700  |
| H | -2.542636 | -4.042262 | -2.513989 | Cl | -1.082230 | -0.294485 | 5.357891  |
| C | -3.373400 | -2.792172 | -0.955826 | Cl | -5.012624 | -3.297679 | -1.310839 |
| C | -3.127148 | -1.837738 | 0.058321  | C  | 1.301987  | 2.555751  | -2.515249 |
| C | -1.813125 | -1.334579 | 0.225063  | C  | 2.429709  | 1.760968  | -2.320520 |
| C | -1.584284 | -0.305521 | 1.288673  | C  | 3.045028  | 0.892949  | -1.615642 |
| C | -1.601770 | -0.766108 | 2.641100  | C  | 4.172645  | 0.102246  | -1.203575 |
| C | -1.265924 | 0.153169  | 3.665125  | C  | 4.535232  | 0.057248  | 0.166842  |
| C | -0.999449 | 1.497522  | 3.352213  | H  | 4.009279  | 0.706307  | 0.888344  |
| H | -0.734179 | 2.183758  | 4.169052  | C  | 5.585247  | -0.776124 | 0.576993  |
| C | -1.034522 | 1.953925  | 2.034410  | C  | 6.286981  | -1.558213 | -0.358941 |
| H | -0.784083 | 3.001282  | 1.829158  | H  | 7.104017  | -2.218209 | -0.026747 |
| C | -1.315441 | 1.051725  | 0.989783  | C  | 5.947688  | -1.490406 | -1.722801 |
| C | -2.332977 | 0.769615  | -1.747481 | H  | 6.496039  | -2.096456 | -2.460754 |
| C | -3.687256 | 0.847136  | -1.354466 | C  | 4.898224  | -0.665964 | -2.147424 |
| H | -3.956519 | 1.343321  | -0.409762 | H  | 4.608643  | -0.625959 | -3.207146 |
| C | -4.681293 | 0.258519  | -2.148184 | H  | 5.859247  | -0.810923 | 1.643131  |



|          |           |           |           |   |           |           |           |
|----------|-----------|-----------|-----------|---|-----------|-----------|-----------|
| O        | 1.583330  | 2.511760  | 0.521973  | H | 0.490455  | -1.327850 | 4.532890  |
| C        | 2.180573  | 2.815679  | 1.598862  | C | 2.150386  | -0.391312 | 3.516311  |
| O        | 3.168163  | 2.291658  | 2.148684  | C | 2.767009  | -0.091754 | 2.277947  |
| O        | 1.572843  | 3.923809  | 2.229380  | C | 2.112343  | -0.491014 | 1.074644  |
| C        | 2.163476  | 4.335126  | 3.457355  | C | 2.702179  | 0.000550  | -0.212004 |
| H        | 1.596062  | 5.224056  | 3.798129  | C | 3.884514  | -0.622910 | -0.684156 |
| H        | 2.103299  | 3.537207  | 4.229515  | C | 4.445795  | -0.187097 | -1.907699 |
| H        | 3.234968  | 4.600432  | 3.330726  | C | 3.887949  | 0.894500  | -2.605705 |
| C        | 0.517433  | 2.578808  | -3.806452 | H | 4.352149  | 1.216789  | -3.549124 |
| H        | 0.540921  | 1.599175  | -4.322406 | C | 2.733705  | 1.520951  | -2.122066 |
| H        | -0.538891 | 2.859457  | -3.618613 | H | 2.293955  | 2.353881  | -2.689193 |
| H        | 0.936514  | 3.341962  | -4.499158 | C | 2.113856  | 1.066515  | -0.941180 |
| H        | 1.290575  | 3.497734  | -1.931922 | C | 0.774719  | 2.318849  | 1.263254  |
|          |           |           |           | C | 1.982527  | 2.966632  | 1.599977  |
| (R)-IM2D |           |           |           | H | 2.758820  | 3.112208  | 0.833164  |
| Ni       | -1.182312 | 0.289427  | -0.494512 | C | 2.215028  | 3.377557  | 2.921548  |
| P        | -0.071538 | -1.537342 | -0.410423 | H | 3.164262  | 3.871820  | 3.181390  |
| P        | 0.444269  | 1.694035  | -0.439696 | C | 1.250879  | 3.135590  | 3.916108  |
| C        | -0.941523 | -3.143056 | -0.173738 | H | 1.443933  | 3.441831  | 4.955724  |
| C        | -2.067000 | -3.351634 | -1.000223 | C | 0.050991  | 2.482438  | 3.586481  |
| H        | -2.385372 | -2.550130 | -1.684635 | H | -0.696504 | 2.272634  | 4.367395  |
| C        | -2.786005 | -4.552858 | -0.932992 | C | -0.187404 | 2.073846  | 2.264822  |
| H        | -3.670885 | -4.694671 | -1.571498 | H | -1.107426 | 1.529429  | 1.996474  |
| C        | -2.395004 | -5.555213 | -0.027880 | C | 0.243772  | 3.194805  | -1.489243 |
| H        | -2.970524 | -6.491672 | 0.041085  | C | -0.394076 | 3.002762  | -2.735304 |
| C        | -1.268854 | -5.359415 | 0.790363  | H | -0.740851 | 1.992816  | -3.010212 |
| H        | -0.953345 | -6.146341 | 1.493780  | C | -0.620478 | 4.089388  | -3.592861 |
| C        | -0.536590 | -4.161563 | 0.713253  | H | -1.119820 | 3.928406  | -4.560984 |
| H        | 0.349358  | -4.022364 | 1.351340  | C | -0.237028 | 5.385140  | -3.200602 |
| C        | 1.134369  | -2.020259 | -1.720599 | H | -0.430546 | 6.242435  | -3.864281 |
| C        | 1.113342  | -1.310272 | -2.935851 | C | 0.379797  | 5.585348  | -1.953357 |
| H        | 0.410002  | -0.469103 | -3.046602 | H | 0.669116  | 6.600083  | -1.637408 |
| C        | 1.999557  | -1.657375 | -3.968495 | C | 0.625453  | 4.494507  | -1.100684 |
| H        | 1.989325  | -1.090984 | -4.912805 | H | 1.099555  | 4.659835  | -0.121712 |
| C        | 2.906128  | -2.715591 | -3.789490 | O | 4.345089  | -1.671207 | 0.050591  |
| H        | 3.610832  | -2.978791 | -4.593239 | C | 5.728803  | -1.745533 | 0.407242  |
| C        | 2.921897  | -3.432456 | -2.578606 | H | 5.768308  | -2.183663 | 1.424541  |
| H        | 3.639652  | -4.254704 | -2.433711 | H | 6.194893  | -0.738866 | 0.426975  |
| C        | 2.033620  | -3.092551 | -1.548562 | H | 6.295372  | -2.391538 | -0.293448 |
| H        | 2.054034  | -3.645891 | -0.597570 | O | 3.903155  | 0.629825  | 2.089851  |
| C        | 0.919216  | -1.251180 | 1.121373  | C | 4.998604  | 0.598344  | 3.004775  |
| C        | 0.342277  | -1.553752 | 2.375566  | H | 5.895454  | 0.852467  | 2.406411  |
| H        | -0.606501 | -2.106565 | 2.428310  | H | 5.129579  | -0.409086 | 3.450665  |
| C        | 0.950611  | -1.123099 | 3.555362  | H | 4.877545  | 1.342098  | 3.817023  |

|          |           |           |           |   |           |           |           |
|----------|-----------|-----------|-----------|---|-----------|-----------|-----------|
| Cl       | 5.794845  | -1.042427 | -2.631489 | H | 0.028707  | 0.780968  | 4.608095  |
| Cl       | 2.767683  | 0.203080  | 5.051763  | C | 0.396476  | 1.694045  | 2.283670  |
| C        | -2.800552 | 1.219162  | -0.154300 | C | -0.686424 | 2.584300  | 2.397093  |
| C        | -3.018635 | -0.065988 | -0.078387 | H | -1.702752 | 2.231717  | 2.164576  |
| C        | -3.924389 | -1.158079 | 0.207117  | C | -0.458120 | 3.911939  | 2.802301  |
| C        | -3.731750 | -1.954573 | 1.365296  | H | -1.304409 | 4.610479  | 2.895272  |
| H        | -2.892948 | -1.712694 | 2.035450  | C | 0.844448  | 4.347657  | 3.098325  |
| C        | -4.579123 | -3.034566 | 1.642320  | H | 1.019358  | 5.389763  | 3.408029  |
| C        | -5.632420 | -3.350922 | 0.764264  | C | 1.924846  | 3.450869  | 3.000854  |
| H        | -6.292326 | -4.206836 | 0.975752  | H | 2.947225  | 3.788469  | 3.229728  |
| C        | -5.832498 | -2.569647 | -0.388440 | C | 1.705742  | 2.129749  | 2.589920  |
| H        | -6.657114 | -2.807656 | -1.079231 | H | 2.544935  | 1.422226  | 2.492294  |
| C        | -4.990622 | -1.483113 | -0.669677 | C | -1.596610 | -0.297820 | 1.423809  |
| H        | -5.144292 | -0.869819 | -1.569842 | C | -2.337132 | -1.067206 | 2.349533  |
| H        | -4.408485 | -3.644835 | 2.543147  | H | -1.882976 | -1.351596 | 3.307477  |
| O        | -4.912141 | 2.235472  | 0.437914  | C | -3.623515 | -1.527869 | 2.055116  |
| C        | -5.657991 | 1.730364  | -0.568927 | H | -4.170858 | -2.163951 | 2.765619  |
| O        | -5.388896 | 1.733693  | -1.754446 | C | -4.199969 | -1.221716 | 0.816437  |
| O        | -6.815455 | 1.203124  | -0.112234 | C | -3.527051 | -0.386700 | -0.103246 |
| C        | -6.964812 | 0.947609  | 1.294860  | C | -2.216660 | 0.080537  | 0.202957  |
| H        | -7.950954 | 0.460107  | 1.405727  | C | -1.606576 | 0.950653  | -0.857500 |
| H        | -6.167203 | 0.264704  | 1.652839  | C | -2.155917 | 2.261042  | -0.993485 |
| H        | -6.938312 | 1.886871  | 1.882709  | C | -1.763995 | 3.060014  | -2.095228 |
| C        | -3.483008 | 2.496988  | 0.172480  | C | -0.827770 | 2.582131  | -3.023974 |
| H        | -3.132036 | 2.815950  | 1.178109  | H | -0.545117 | 3.222242  | -3.871795 |
| C        | -3.269707 | 3.651978  | -0.803095 | C | -0.272431 | 1.309290  | -2.874630 |
| H        | -2.201825 | 3.942415  | -0.785602 | H | 0.456428  | 0.956257  | -3.615476 |
| H        | -3.543177 | 3.356318  | -1.831231 | C | -0.652922 | 0.481512  | -1.799521 |
| H        | -3.878510 | 4.526028  | -0.495951 | C | -1.111909 | -2.317021 | -1.245453 |
|          |           |           |           | C | -2.161522 | -2.412901 | -2.184547 |
|          |           |           |           | H | -2.171312 | -1.755881 | -3.067403 |
| (R)-IM3E |           |           |           | C | -3.208498 | -3.320770 | -1.969689 |
| Ni       | 1.674545  | -0.646590 | 0.117200  | H | -4.037425 | -3.379499 | -2.691271 |
| P        | 0.218115  | -0.045048 | 1.734994  | C | -3.214048 | -4.131124 | -0.820084 |
| P        | 0.237119  | -1.095877 | -1.466611 | H | -4.046766 | -4.829319 | -0.644954 |
| C        | 0.433413  | -0.941511 | 3.334147  | C | -2.170482 | -4.034339 | 0.116098  |
| C        | 0.734319  | -2.319844 | 3.305545  | H | -2.180806 | -4.655153 | 1.025055  |
| H        | 0.931626  | -2.807742 | 2.339288  | C | -1.118044 | -3.130016 | -0.095677 |
| C        | 0.841129  | -3.043520 | 4.502609  | H | -0.308610 | -3.023717 | 0.641236  |
| H        | 1.088888  | -4.115987 | 4.468769  | C | 1.077117  | -1.599086 | -3.012635 |
| C        | 0.658282  | -2.398235 | 5.738933  | C | 2.141081  | -0.807906 | -3.514412 |
| H        | 0.750364  | -2.965929 | 6.678306  | H | 2.398026  | 0.143892  | -3.030999 |
| C        | 0.370993  | -1.022670 | 5.772162  | C | 2.879428  | -1.234996 | -4.629880 |
| H        | 0.234489  | -0.508838 | 6.736889  | H | 3.690884  | -0.599531 | -5.017343 |
| C        | 0.258139  | -0.294624 | 4.575339  |   |           |           |           |

|    |           |           |           |      |           |           |           |
|----|-----------|-----------|-----------|------|-----------|-----------|-----------|
| C  | 2.600643  | -2.473268 | -5.232104 | H    | 4.614720  | -1.850216 | -1.024421 |
| H  | 3.191692  | -2.814292 | -6.096285 |      |           |           |           |
| C  | 1.569987  | -3.280866 | -4.717285 | IM1F |           |           |           |
| H  | 1.350012  | -4.256696 | -5.177927 | Ni   | 0.786206  | -0.718454 | -1.085449 |
| C  | 0.812768  | -2.850334 | -3.617312 | P    | 0.477511  | 0.973651  | 0.203508  |
| H  | 0.010779  | -3.491203 | -3.223064 | P    | -1.105721 | -1.634927 | -1.031091 |
| O  | -3.095277 | 2.604137  | -0.067165 | C    | 2.017842  | 1.459884  | 1.063937  |
| C  | -3.166036 | 3.922956  | 0.492213  | C    | 2.726003  | 0.448202  | 1.758222  |
| H  | -2.163177 | 4.391402  | 0.543599  | H    | 2.292095  | -0.561425 | 1.844975  |
| H  | -3.559180 | 3.793226  | 1.519549  | C    | 3.980818  | 0.714127  | 2.325868  |
| H  | -3.850834 | 4.573820  | -0.084969 | H    | 4.516990  | -0.083461 | 2.861108  |
| O  | -4.028424 | -0.111932 | -1.341831 | C    | 4.567469  | 1.981787  | 2.172212  |
| C  | -5.211628 | 0.696883  | -1.447139 | H    | 5.566258  | 2.181800  | 2.588595  |
| H  | -5.448954 | 0.743723  | -2.526238 | C    | 3.877701  | 2.988716  | 1.472509  |
| H  | -5.010121 | 1.717010  | -1.062984 | H    | 4.329620  | 3.986918  | 1.357541  |
| H  | -6.068127 | 0.247735  | -0.904284 | C    | 2.611936  | 2.733609  | 0.920648  |
| Cl | -2.468835 | 4.639299  | -2.396976 | H    | 2.080417  | 3.526050  | 0.372192  |
| Cl | -5.726003 | -1.961266 | 0.381747  | C    | -0.138981 | 2.500214  | -0.606604 |
| C  | 4.472678  | -0.771585 | -1.216206 | C    | -0.168768 | 2.524350  | -2.015929 |
| C  | 3.378000  | -0.155163 | -0.705236 | H    | 0.192309  | 1.643009  | -2.570547 |
| C  | 2.566936  | 0.867937  | -0.411650 | C    | -0.690307 | 3.638439  | -2.691220 |
| C  | 2.488150  | 2.301477  | -0.438982 | H    | -0.732024 | 3.644014  | -3.791350 |
| C  | 1.241554  | 2.974754  | -0.388025 | C    | -1.179606 | 4.734804  | -1.960242 |
| H  | 0.327086  | 2.377090  | -0.333983 | H    | -1.601954 | 5.603183  | -2.488716 |
| C  | 1.180647  | 4.370570  | -0.406230 | C    | -1.144029 | 4.717757  | -0.553781 |
| C  | 2.365862  | 5.128705  | -0.430223 | H    | -1.531406 | 5.576048  | 0.017659  |
| H  | 2.319221  | 6.228930  | -0.422711 | C    | -0.629949 | 3.602046  | 0.124922  |
| C  | 3.614984  | 4.476199  | -0.465684 | H    | -0.629468 | 3.571766  | 1.225443  |
| H  | 4.544590  | 5.066672  | -0.482008 | C    | -0.767262 | 0.678284  | 1.528386  |
| C  | 3.680170  | 3.078390  | -0.494586 | C    | -0.397107 | 0.518873  | 2.878976  |
| H  | 4.651723  | 2.562505  | -0.525263 | H    | 0.640533  | 0.702183  | 3.191657  |
| H  | 0.201223  | 4.872459  | -0.393180 | C    | -1.334869 | 0.101377  | 3.830175  |
| O  | 3.382995  | -1.188384 | 2.181991  | H    | -1.041538 | -0.063864 | 4.877051  |
| C  | 3.517552  | -2.296546 | 1.683603  | C    | -2.662660 | -0.138974 | 3.445745  |
| O  | 4.245232  | -3.271980 | 1.691086  | C    | -3.078628 | 0.080009  | 2.111793  |
| O  | 2.220217  | -2.516091 | 0.638158  | C    | -2.118886 | 0.469341  | 1.145257  |
| C  | 2.371275  | -3.543781 | -0.328385 | C    | -2.589595 | 0.666399  | -0.264763 |
| H  | 3.035194  | -4.328019 | 0.091061  | C    | -3.330573 | 1.858448  | -0.531479 |
| H  | 1.381057  | -3.989046 | -0.566149 | C    | -3.703347 | 2.135940  | -1.870104 |
| H  | 2.816703  | -3.163344 | -1.275314 | C    | -3.398370 | 1.223958  | -2.895626 |
| C  | 5.533213  | -0.078123 | -2.024154 | H    | -3.700513 | 1.472679  | -3.923383 |
| H  | 6.515186  | -0.094928 | -1.498453 | C    | -2.706827 | 0.042915  | -2.621646 |
| H  | 5.693673  | -0.599770 | -2.994419 | H    | -2.467759 | -0.648523 | -3.442579 |
| H  | 5.270694  | 0.977482  | -2.235311 | C    | -2.293626 | -0.249072 | -1.303590 |

|    |           |           |           |      |           |           |           |
|----|-----------|-----------|-----------|------|-----------|-----------|-----------|
| C  | -1.645685 | -2.435822 | 0.536920  | H    | 4.848406  | 1.437523  | -1.485457 |
| C  | -2.987950 | -2.787230 | 0.788124  | C    | 6.629793  | 1.018993  | -0.250492 |
| H  | -3.767661 | -2.561487 | 0.046353  | C    | 7.274774  | 0.076476  | 0.598580  |
| C  | -3.342953 | -3.372538 | 2.011853  | H    | 8.245239  | 0.359104  | 1.032496  |
| H  | -4.396098 | -3.621902 | 2.212849  | C    | 6.678530  | -1.157448 | 0.888491  |
| C  | -2.361769 | -3.613680 | 2.990593  | H    | 7.165019  | -1.874232 | 1.567869  |
| H  | -2.645988 | -4.060928 | 3.955492  | C    | 5.438517  | -1.459004 | 0.307694  |
| C  | -1.022969 | -3.267628 | 2.743055  | C    | 6.685785  | 3.187683  | -1.247372 |
| H  | -0.251795 | -3.446883 | 3.508060  | H    | 5.689890  | 3.493044  | -0.857770 |
| C  | -0.665841 | -2.679444 | 1.519596  | H    | 6.568706  | 2.829873  | -2.294513 |
| H  | 0.377551  | -2.392837 | 1.315207  | H    | 7.366249  | 4.059151  | -1.235389 |
| C  | -1.543763 | -2.873237 | -2.327119 |      |           |           |           |
| C  | -0.459411 | -3.483020 | -2.991506 | TS1F |           |           |           |
| H  | 0.564492  | -3.170330 | -2.724058 | Ni   | 0.775699  | -0.835193 | -1.057791 |
| C  | -0.684979 | -4.470813 | -3.964815 | P    | 0.461801  | 0.970557  | 0.161459  |
| H  | 0.169518  | -4.945319 | -4.472098 | P    | -1.134844 | -1.646036 | -1.033189 |
| C  | -1.999804 | -4.845066 | -4.290609 | C    | 2.024135  | 1.379962  | 1.030624  |
| H  | -2.180761 | -5.615295 | -5.056842 | C    | 2.685972  | 0.322565  | 1.700666  |
| C  | -3.087320 | -4.231913 | -3.639891 | H    | 2.229839  | -0.680875 | 1.724293  |
| H  | -4.118432 | -4.520595 | -3.898354 | C    | 3.923255  | 0.540841  | 2.325373  |
| C  | -2.862714 | -3.251891 | -2.660183 | H    | 4.423909  | -0.288118 | 2.847252  |
| H  | -3.719507 | -2.770370 | -2.164716 | C    | 4.533821  | 1.804896  | 2.255290  |
| O  | -3.529875 | 2.629742  | 0.567762  | H    | 5.516363  | 1.968900  | 2.722866  |
| C  | -4.510331 | 3.660835  | 0.661679  | C    | 3.892747  | 2.852393  | 1.571250  |
| H  | -4.615837 | 3.862980  | 1.745292  | H    | 4.368915  | 3.844062  | 1.513565  |
| H  | -5.488502 | 3.337973  | 0.251201  | C    | 2.642025  | 2.645760  | 0.963402  |
| H  | -4.184020 | 4.585908  | 0.146630  | H    | 2.143232  | 3.471029  | 0.432620  |
| O  | -4.346437 | -0.137599 | 1.663810  | C    | -0.159215 | 2.539119  | -0.555645 |
| C  | -5.435709 | 0.547140  | 2.292620  | C    | -0.262447 | 2.609708  | -1.960367 |
| H  | -6.165839 | 0.782940  | 1.492774  | H    | 0.053922  | 1.742124  | -2.562003 |
| H  | -5.095813 | 1.492750  | 2.762893  | C    | -0.802845 | 3.752524  | -2.569465 |
| H  | -5.923055 | -0.085462 | 3.062310  | H    | -0.905109 | 3.795113  | -3.664733 |
| Cl | -4.483083 | 3.632940  | -2.372329 | C    | -1.234194 | 4.831193  | -1.777732 |
| Cl | -3.781023 | -0.791717 | 4.626820  | H    | -1.669363 | 5.722901  | -2.254601 |
| H  | 1.515445  | -2.480434 | -0.572706 | C    | -1.122908 | 4.768000  | -0.376487 |
| O  | 2.318677  | -3.114445 | -0.403574 | H    | -1.462282 | 5.613724  | 0.242205  |
| O  | 4.651905  | -3.623964 | 1.211024  | C    | -0.594187 | 3.621653  | 0.237307  |
| O  | 2.579133  | -0.549102 | -1.624453 | H    | -0.537420 | 3.554088  | 1.334851  |
| O  | 7.287413  | 2.198345  | -0.420286 | C    | -0.744664 | 0.624802  | 1.519927  |
| N  | 3.384983  | -2.271423 | -0.247927 | C    | -0.338224 | 0.418517  | 2.853042  |
| C  | 4.529749  | -2.609437 | 0.534132  | H    | 0.710402  | 0.570931  | 3.142500  |
| C  | 3.505361  | -1.057702 | -0.924484 | C    | -1.255865 | -0.008642 | 3.820118  |
| C  | 4.810538  | -0.521519 | -0.557828 | H    | -0.932544 | -0.216714 | 4.850312  |
| C  | 5.384274  | 0.722440  | -0.848699 | C    | -2.601083 | -0.198482 | 3.472538  |

|    |           |           |           |      |           |           |           |
|----|-----------|-----------|-----------|------|-----------|-----------|-----------|
| C  | -3.052086 | 0.073625  | 2.160516  | H    | 1.085342  | -2.292789 | -1.189925 |
| C  | -2.109506 | 0.456198  | 1.174861  | O    | 2.383278  | -3.076349 | -0.366937 |
| C  | -2.604978 | 0.665961  | -0.222248 | O    | 4.743201  | -3.557557 | 1.162484  |
| C  | -3.344782 | 1.861738  | -0.474202 | O    | 2.608158  | -0.467160 | -1.586864 |
| C  | -3.753395 | 2.130903  | -1.804301 | O    | 7.232676  | 2.311064  | -0.481275 |
| C  | -3.484283 | 1.206972  | -2.829149 | N    | 3.416533  | -2.266940 | -0.306858 |
| H  | -3.818415 | 1.446802  | -3.849074 | C    | 4.605762  | -2.559161 | 0.477196  |
| C  | -2.789940 | 0.024503  | -2.567644 | C    | 3.526612  | -1.041713 | -0.930678 |
| H  | -2.581738 | -0.675774 | -3.389085 | C    | 4.849671  | -0.482659 | -0.595059 |
| C  | -2.335406 | -0.256333 | -1.261030 | C    | 5.371681  | 0.773199  | -0.888726 |
| C  | -1.611341 | -2.524937 | 0.503310  | H    | 4.800296  | 1.472825  | -1.511546 |
| C  | -2.955487 | -2.691616 | 0.895824  | C    | 6.622863  | 1.109437  | -0.302571 |
| H  | -3.767745 | -2.255545 | 0.295059  | C    | 7.302184  | 0.188399  | 0.531087  |
| C  | -3.257399 | -3.344326 | 2.099668  | H    | 8.268076  | 0.496424  | 0.957678  |
| H  | -4.306256 | -3.444536 | 2.417540  | C    | 6.742758  | -1.070398 | 0.821966  |
| C  | -2.220312 | -3.832758 | 2.914537  | H    | 7.255075  | -1.772288 | 1.497749  |
| H  | -2.459330 | -4.329293 | 3.867972  | C    | 5.511570  | -1.400342 | 0.250031  |
| C  | -0.880917 | -3.674381 | 2.519253  | C    | 6.580885  | 3.285417  | -1.289747 |
| H  | -0.066926 | -4.057528 | 3.154441  | H    | 5.584510  | 3.556294  | -0.876874 |
| C  | -0.568665 | -3.020209 | 1.315455  | H    | 6.454403  | 2.930920  | -2.336520 |
| H  | 0.480726  | -2.902894 | 0.990988  | H    | 7.233293  | 4.178057  | -1.285313 |
| C  | -1.577082 | -2.797652 | -2.400854 |      |           |           |           |
| C  | -0.586389 | -3.102055 | -3.354922 | IM2F |           |           |           |
| H  | 0.415522  | -2.657618 | -3.233232 | Ni   | -0.260409 | -1.790905 | 1.042807  |
| C  | -0.874872 | -3.967200 | -4.424265 | P    | -0.579192 | -0.585876 | -0.775038 |
| H  | -0.093374 | -4.202581 | -5.163515 | P    | 1.508117  | -0.881955 | 1.684504  |
| C  | -2.155136 | -4.533667 | -4.542599 | C    | -1.703475 | -1.424614 | -1.958169 |
| H  | -2.382299 | -5.214988 | -5.377655 | C    | -1.514405 | -2.812498 | -2.158651 |
| C  | -3.147648 | -4.234338 | -3.589830 | H    | -0.734235 | -3.343845 | -1.593709 |
| H  | -4.150496 | -4.680958 | -3.678279 | C    | -2.345347 | -3.517504 | -3.040731 |
| C  | -2.861982 | -3.369501 | -2.522385 | H    | -2.191741 | -4.597599 | -3.185537 |
| H  | -3.642958 | -3.139749 | -1.782137 | C    | -3.398889 | -2.859129 | -3.697662 |
| O  | -3.512215 | 2.631227  | 0.630260  | H    | -4.062616 | -3.419579 | -4.374129 |
| C  | -4.419106 | 3.727454  | 0.726912  | C    | -3.624989 | -1.493260 | -3.459244 |
| H  | -4.474342 | 3.960667  | 1.807802  | H    | -4.469495 | -0.978000 | -3.942862 |
| H  | -5.429184 | 3.460782  | 0.355870  | C    | -2.781627 | -0.774914 | -2.595905 |
| H  | -4.047234 | 4.615492  | 0.178939  | H    | -2.973090 | 0.291401  | -2.408312 |
| O  | -4.341304 | -0.095434 | 1.750741  | C    | -1.088717 | 1.181902  | -0.826629 |
| C  | -5.379061 | 0.633672  | 2.417722  | C    | -1.541228 | 1.809528  | 0.350950  |
| H  | -6.151778 | 0.850401  | 1.653952  | H    | -1.590176 | 1.233550  | 1.286915  |
| H  | -4.993342 | 1.590703  | 2.825240  | C    | -1.912016 | 3.163887  | 0.322623  |
| H  | -5.828445 | 0.042095  | 3.241208  | H    | -2.237329 | 3.657534  | 1.251797  |
| Cl | -4.544721 | 3.623250  | -2.300823 | C    | -1.847943 | 3.892530  | -0.876625 |
| Cl | -3.699777 | -0.863634 | 4.663564  | H    | -2.134312 | 4.955411  | -0.893386 |

|   |           |           |           |      |           |           |           |
|---|-----------|-----------|-----------|------|-----------|-----------|-----------|
| C | -1.402552 | 3.265041  | -2.055126 | H    | 2.303944  | 3.976226  | -3.437611 |
| H | -1.351370 | 3.832282  | -2.997834 | H    | 2.805081  | 4.829098  | -1.923851 |
| C | -1.012190 | 1.917889  | -2.030219 | H    | 1.053890  | 4.724657  | -2.369286 |
| H | -0.632658 | 1.435639  | -2.944348 | O    | 4.293093  | 1.149765  | -1.178848 |
| C | 1.064059  | -0.545223 | -1.639398 | C    | 5.000107  | 2.037229  | -2.054041 |
| C | 1.378221  | -1.451443 | -2.671426 | H    | 5.169423  | 2.972193  | -1.484137 |
| H | 0.604767  | -2.119085 | -3.075028 | H    | 4.399314  | 2.267945  | -2.957524 |
| C | 2.678648  | -1.528115 | -3.184369 | H    | 5.975952  | 1.610480  | -2.363174 |
| H | 2.934221  | -2.262432 | -3.962005 | Cl   | 1.197410  | 5.369344  | 0.278471  |
| C | 3.678169  | -0.676649 | -2.691488 | Cl   | 5.321803  | -0.875783 | -3.264508 |
| C | 3.376828  | 0.291473  | -1.706680 | H    | 0.374235  | -2.744582 | 2.004837  |
| C | 2.068071  | 0.335424  | -1.161844 | O    | -1.817593 | -2.978171 | 0.966528  |
| C | 1.805301  | 1.327125  | -0.072340 | O    | -4.135896 | -3.654320 | -0.628167 |
| C | 1.732527  | 2.705837  | -0.437805 | O    | -2.319644 | -0.510762 | 2.258004  |
| C | 1.421372  | 3.648070  | 0.574844  | O    | -6.681210 | 2.350914  | 0.281791  |
| C | 1.230768  | 3.228220  | 1.903015  | N    | -2.908720 | -2.228661 | 0.792747  |
| H | 0.990273  | 3.988856  | 2.659826  | C    | -4.008323 | -2.589304 | -0.048901 |
| C | 1.324841  | 1.880608  | 2.254706  | C    | -3.100768 | -1.004718 | 1.431277  |
| H | 1.160125  | 1.576652  | 3.297553  | C    | -4.347048 | -0.433562 | 0.844231  |
| C | 1.611468  | 0.917565  | 1.266148  | C    | -4.900223 | 0.834018  | 1.010398  |
| C | 3.046398  | -1.599618 | 0.998500  | H    | -4.429968 | 1.554507  | 1.691691  |
| C | 4.283858  | -0.923756 | 1.044264  | C    | -6.058418 | 1.143200  | 0.246062  |
| H | 4.353142  | 0.074785  | 1.501435  | C    | -6.628498 | 0.177063  | -0.619725 |
| C | 5.412306  | -1.491645 | 0.434530  | H    | -7.526498 | 0.464172  | -1.186704 |
| H | 6.370924  | -0.951207 | 0.450900  | C    | -6.052044 | -1.098412 | -0.763238 |
| C | 5.309375  | -2.726448 | -0.229896 | H    | -6.482611 | -1.841266 | -1.451373 |
| H | 6.192217  | -3.158211 | -0.725811 | C    | -4.898404 | -1.389232 | -0.031911 |
| C | 4.075138  | -3.397129 | -0.283671 | C    | -6.104969 | 3.382375  | 1.076273  |
| H | 3.988570  | -4.355619 | -0.818551 | H    | -5.064868 | 3.610043  | 0.753191  |
| C | 2.944247  | -2.836127 | 0.328628  | H    | -6.099013 | 3.115058  | 2.156219  |
| H | 1.958806  | -3.326865 | 0.279797  | H    | -6.737713 | 4.277047  | 0.929153  |
| C | 1.663123  | -0.860123 | 3.516154  |      |           |           |           |
| C | 0.468751  | -0.994545 | 4.256861  | IM3F |           |           |           |
| H | -0.483153 | -1.152051 | 3.722534  | Ni   | 0.791294  | -1.040202 | -0.003875 |
| C | 0.504388  | -0.921290 | 5.658914  | P    | 0.289352  | 0.104038  | -1.762881 |
| H | -0.430087 | -1.021589 | 6.232869  | P    | 0.319642  | 0.574443  | 1.458226  |
| C | 1.728294  | -0.734345 | 6.326014  | C    | 0.913394  | -0.486843 | -3.385919 |
| H | 1.755734  | -0.687959 | 7.426150  | C    | 2.290872  | -0.390247 | -3.688791 |
| C | 2.919755  | -0.615468 | 5.588014  | H    | 2.989091  | 0.030516  | -2.951415 |
| H | 3.881244  | -0.480495 | 6.107921  | C    | 2.784902  | -0.858498 | -4.914118 |
| C | 2.889295  | -0.672513 | 4.184538  | H    | 3.858351  | -0.767886 | -5.136189 |
| H | 3.825094  | -0.582242 | 3.613506  | C    | 1.922176  | -1.478725 | -5.832926 |
| O | 1.938071  | 2.915671  | -1.761115 | H    | 2.315215  | -1.860196 | -6.787956 |
| C | 2.025328  | 4.193134  | -2.388561 | C    | 0.564950  | -1.640041 | -5.511403 |

|   |           |           |           |    |           |           |           |
|---|-----------|-----------|-----------|----|-----------|-----------|-----------|
| H | -0.112567 | -2.156285 | -6.209298 | C  | 1.114737  | -1.146737 | 5.097119  |
| C | 0.061464  | -1.150005 | -4.296197 | H  | 1.645399  | -2.046267 | 5.440983  |
| H | -1.000495 | -1.292321 | -4.053411 | C  | 0.604286  | -0.221750 | 6.023199  |
| C | -1.538978 | 0.088744  | -2.006641 | H  | 0.726225  | -0.398655 | 7.103447  |
| C | -2.366520 | -0.630877 | -1.131082 | C  | -0.072912 | 0.925419  | 5.570335  |
| H | -1.902802 | -1.145346 | -0.281197 | H  | -0.489199 | 1.644952  | 6.293136  |
| C | -3.757889 | -0.640380 | -1.310584 | C  | -0.215903 | 1.161405  | 4.193846  |
| H | -4.393663 | -1.191646 | -0.602884 | H  | -0.752636 | 2.057734  | 3.847194  |
| C | -4.326854 | 0.058703  | -2.386648 | O  | -2.479707 | 3.597705  | -1.581839 |
| H | -5.417647 | 0.051417  | -2.532984 | C  | -3.577008 | 4.133444  | -2.320859 |
| C | -3.501287 | 0.778293  | -3.271789 | H  | -3.109837 | 4.681404  | -3.161377 |
| H | -3.944590 | 1.321486  | -4.121127 | H  | -4.181825 | 4.835002  | -1.712469 |
| C | -2.112490 | 0.809652  | -3.077644 | H  | -4.229205 | 3.332658  | -2.718975 |
| H | -1.470642 | 1.391089  | -3.756863 | O  | -0.327035 | 4.798775  | 0.385238  |
| C | 0.606475  | 1.933841  | -1.728837 | C  | -1.015458 | 6.003015  | 0.018458  |
| C | 1.655680  | 2.499696  | -2.480763 | H  | -1.553101 | 6.332698  | 0.927042  |
| H | 2.176078  | 1.901290  | -3.238747 | H  | -1.747180 | 5.795497  | -0.788123 |
| C | 2.075033  | 3.815723  | -2.263142 | H  | -0.315278 | 6.800505  | -0.304190 |
| H | 2.924856  | 4.236213  | -2.819905 | Cl | -5.384585 | 2.811346  | -0.283927 |
| C | 1.438685  | 4.593240  | -1.286603 | Cl | 2.109946  | 6.157950  | -0.878999 |
| C | 0.316013  | 4.093356  | -0.588881 | O  | 0.351504  | -2.701249 | 1.141030  |
| C | -0.105046 | 2.754776  | -0.809797 | O  | -0.854015 | -4.091916 | -1.057680 |
| C | -1.313717 | 2.306861  | -0.039217 | O  | -1.777774 | -1.896887 | 2.944146  |
| C | -2.581291 | 2.785851  | -0.497727 | O  | -6.916326 | -3.145569 | 1.283400  |
| C | -3.746998 | 2.362528  | 0.187716  | N  | -0.950657 | -2.935438 | 0.995846  |
| C | -3.647930 | 1.509457  | 1.302449  | C  | -1.497345 | -3.655046 | -0.115006 |
| H | -4.576150 | 1.194010  | 1.800502  | C  | -1.952221 | -2.526481 | 1.907739  |
| C | -2.410664 | 1.054295  | 1.754067  | C  | -3.243583 | -2.995952 | 1.311389  |
| H | -2.356314 | 0.348135  | 2.595114  | C  | -4.542031 | -2.778502 | 1.768487  |
| C | -1.232464 | 1.460074  | 1.088343  | H  | -4.708883 | -2.227255 | 2.703603  |
| C | 1.672468  | 1.841045  | 1.362319  | C  | -5.603534 | -3.288117 | 0.971625  |
| C | 1.598491  | 3.037080  | 2.106677  | C  | -5.327857 | -3.987830 | -0.232171 |
| H | 0.715065  | 3.250856  | 2.723720  | H  | -6.184380 | -4.359959 | -0.813548 |
| C | 2.632955  | 3.980413  | 2.032049  | C  | -4.008636 | -4.188218 | -0.670490 |
| H | 2.554068  | 4.921225  | 2.597695  | H  | -3.798626 | -4.716093 | -1.612744 |
| C | 3.754372  | 3.735872  | 1.218476  | C  | -2.967454 | -3.684046 | 0.116533  |
| H | 4.560100  | 4.482968  | 1.151258  | C  | -7.258563 | -2.439681 | 2.472790  |
| C | 3.835287  | 2.541732  | 0.483414  | H  | -6.897311 | -1.387992 | 2.440740  |
| H | 4.709278  | 2.342679  | -0.156044 | H  | -6.845603 | -2.937789 | 3.377144  |
| C | 2.800807  | 1.594656  | 0.556307  | H  | -8.362550 | -2.443082 | 2.527466  |
| H | 2.862877  | 0.659202  | -0.019039 | C  | 4.371415  | -2.515465 | 1.182601  |
| C | 0.313073  | 0.242024  | 3.262405  | H  | 5.236623  | -1.842801 | 0.982825  |
| C | 0.957935  | -0.925028 | 3.719955  | C  | 3.090866  | -1.885243 | 0.656132  |
| H | 1.290926  | -1.680192 | 2.993228  | C  | 2.423467  | -2.004391 | -0.515033 |

|      |           |           |           |   |           |           |           |
|------|-----------|-----------|-----------|---|-----------|-----------|-----------|
| C    | 2.867415  | -2.651204 | -1.744126 | H | 3.797568  | -1.952067 | 0.164150  |
| C    | 1.996570  | -3.479288 | -2.493095 | C | 3.409284  | -2.503114 | -1.906797 |
| H    | 0.967763  | -3.621636 | -2.130107 | H | 4.276152  | -3.178311 | -1.973063 |
| C    | 2.452521  | -4.119635 | -3.652750 | C | 2.562152  | -2.332363 | -3.017972 |
| C    | 3.776244  | -3.941846 | -4.097511 | H | 2.774162  | -2.864773 | -3.958860 |
| H    | 4.126217  | -4.445306 | -5.012455 | C | 1.447999  | -1.481398 | -2.933923 |
| C    | 4.644022  | -3.100993 | -3.377575 | H | 0.771588  | -1.366510 | -3.795091 |
| H    | 5.676487  | -2.940713 | -3.727557 | C | -1.681486 | -0.683113 | -1.951065 |
| C    | 4.190311  | -2.451217 | -2.221990 | C | -2.731618 | -0.233330 | -2.778347 |
| H    | 4.858456  | -1.770052 | -1.671094 | H | -2.611521 | 0.681430  | -3.371902 |
| C    | 4.652291  | -3.932425 | 0.696892  | C | -3.946487 | -0.923258 | -2.853750 |
| H    | 5.538120  | -4.338447 | 1.223839  | H | -4.773058 | -0.542286 | -3.471193 |
| H    | 4.843985  | -3.947286 | -0.390771 | C | -4.126013 | -2.099538 | -2.113581 |
| H    | 3.777302  | -4.579061 | 0.904821  | C | -3.066054 | -2.631298 | -1.346787 |
| H    | 1.764026  | -4.763905 | -4.221821 | C | -1.844438 | -1.910531 | -1.254648 |
| C    | 4.271806  | -1.601345 | 3.478165  | C | -0.776505 | -2.520282 | -0.400057 |
| O    | 4.237566  | -1.736251 | 4.685855  | C | -0.090950 | -3.655097 | -0.930875 |
| O    | 4.315639  | -0.412613 | 2.826864  | C | 0.899604  | -4.275206 | -0.130859 |
| C    | 4.203718  | 0.750112  | 3.670278  | C | 1.190772  | -3.779161 | 1.150937  |
| H    | 4.314855  | 1.618549  | 2.998356  | H | 1.965596  | -4.285225 | 1.744694  |
| H    | 3.208594  | 0.771449  | 4.157129  | C | 0.522991  | -2.664130 | 1.657882  |
| H    | 4.992387  | 0.744330  | 4.448173  | H | 0.788897  | -2.281995 | 2.652210  |
| O    | 4.269472  | -2.653845 | 2.643615  | C | -0.464382 | -2.021692 | 0.883379  |
| H    | 2.615438  | -1.263923 | 1.444256  | C | -2.991334 | -0.647925 | 1.278027  |
|      |           |           |           | C | -3.651266 | -1.833529 | 1.661095  |
| TS2F |           |           |           | H | -3.074847 | -2.677182 | 2.068114  |
| Ni   | -0.526672 | 1.348418  | 0.352797  | C | -5.032786 | -1.966110 | 1.455442  |
| P    | -0.209151 | 0.400484  | -1.570024 | H | -5.538767 | -2.901803 | 1.737809  |
| P    | -1.172756 | -0.407974 | 1.453557  | C | -5.760853 | -0.927645 | 0.849033  |
| C    | -0.050745 | 1.500897  | -3.038632 | H | -6.839302 | -1.047892 | 0.663975  |
| C    | -1.087856 | 2.418971  | -3.327127 | C | -5.103012 | 0.247384  | 0.444564  |
| H    | -1.958983 | 2.486182  | -2.658946 | H | -5.662103 | 1.045652  | -0.068986 |
| C    | -0.997259 | 3.282380  | -4.427584 | C | -3.723418 | 0.389692  | 0.662493  |
| H    | -1.816222 | 3.987587  | -4.634713 | H | -3.178683 | 1.286757  | 0.319651  |
| C    | 0.157577  | 3.282078  | -5.227832 | C | -0.786820 | -0.509136 | 3.258223  |
| H    | 0.238625  | 3.972601  | -6.081699 | C | 0.440205  | 0.081875  | 3.637181  |
| C    | 1.224135  | 2.428090  | -4.903947 | H | 1.056303  | 0.622148  | 2.887072  |
| H    | 2.152433  | 2.453373  | -5.496171 | C | 0.877104  | -0.007593 | 4.969031  |
| C    | 1.124743  | 1.543733  | -3.816854 | H | 1.851313  | 0.431853  | 5.230853  |
| H    | 1.979698  | 0.907104  | -3.552977 | C | 0.081383  | -0.653592 | 5.930790  |
| C    | 1.201526  | -0.769231 | -1.741803 | H | 0.418419  | -0.715964 | 6.978072  |
| C    | 2.049268  | -0.942837 | -0.632984 | C | -1.153172 | -1.218016 | 5.557016  |
| H    | 1.811246  | -0.394033 | 0.289275  | H | -1.785679 | -1.712561 | 6.311316  |
| C    | 3.144039  | -1.816198 | -0.710501 | C | -1.586148 | -1.155203 | 4.222976  |



|    |           |           |           |      |           |           |           |
|----|-----------|-----------|-----------|------|-----------|-----------|-----------|
| H  | -2.555314 | -1.591185 | 3.943716  | H    | -1.754275 | 6.974426  | -2.752153 |
| O  | -0.508662 | -4.005481 | -2.175362 | C    | -1.262885 | 5.274858  | -1.493355 |
| C  | 0.210537  | -4.853500 | -3.072734 | H    | -2.244424 | 5.250355  | -0.993992 |
| H  | -0.256489 | -4.683256 | -4.061990 | C    | 0.128161  | 3.974964  | 3.155445  |
| H  | 0.111888  | -5.922326 | -2.796323 | H    | -0.042830 | 4.122911  | 4.240027  |
| H  | 1.281154  | -4.578574 | -3.118385 | H    | 0.504413  | 4.926454  | 2.724333  |
| O  | -3.194284 | -3.764005 | -0.594269 | H    | 0.894295  | 3.195794  | 2.952510  |
| C  | -3.390341 | -5.012903 | -1.273078 | H    | 2.221511  | 5.296481  | -3.264911 |
| H  | -3.394784 | -5.788144 | -0.484018 | C    | -3.178040 | 2.155876  | 3.389828  |
| H  | -2.552098 | -5.202570 | -1.973153 | O    | -3.578704 | 1.199520  | 3.988823  |
| H  | -4.355483 | -5.040531 | -1.819538 | O    | -3.846526 | 3.142167  | 2.815697  |
| Cl | 1.814926  | -5.690194 | -0.639630 | C    | -5.292067 | 3.037337  | 2.911508  |
| Cl | -5.704582 | -2.863280 | -2.097268 | H    | -5.684414 | 3.916645  | 2.373817  |
| O  | 1.787547  | 1.833187  | 1.435092  | H    | -5.622612 | 2.095599  | 2.432059  |
| O  | 3.025553  | 2.028434  | -1.162775 | H    | -5.601228 | 3.051987  | 3.974225  |
| O  | 3.630101  | 0.558205  | 3.209961  | O    | -1.770557 | 2.371744  | 3.218515  |
| O  | 8.368406  | -1.210860 | 0.879194  | H    | -1.373678 | 1.645726  | 2.531767  |
| N  | 3.008895  | 1.455555  | 1.125781  |      |           |           |           |
| C  | 3.573776  | 1.542993  | -0.172242 | IM4F |           |           |           |
| C  | 3.877095  | 0.800951  | 2.028795  | Ni   | 0.095590  | 1.169898  | 0.921609  |
| C  | 5.095610  | 0.440559  | 1.235008  | P    | 0.758361  | 1.132591  | -1.183864 |
| C  | 6.227388  | -0.268565 | 1.629643  | P    | -1.363615 | -0.456121 | 1.173843  |
| H  | 6.325235  | -0.610771 | 2.668851  | C    | 0.990763  | 2.749351  | -2.018262 |
| C  | 7.214849  | -0.526807 | 0.635502  | C    | -0.133282 | 3.540343  | -2.362067 |
| C  | 7.032651  | -0.074791 | -0.691809 | H    | -1.149247 | 3.161039  | -2.185587 |
| H  | 7.820972  | -0.303916 | -1.424401 | C    | 0.029872  | 4.823270  | -2.901864 |
| C  | 5.874665  | 0.639984  | -1.063016 | H    | -0.859070 | 5.415730  | -3.165263 |
| H  | 5.726214  | 0.977818  | -2.099794 | C    | 1.316566  | 5.362204  | -3.069162 |
| C  | 4.913119  | 0.894484  | -0.084371 | H    | 1.444075  | 6.372718  | -3.487270 |
| C  | 8.603951  | -1.689172 | 2.197267  | C    | 2.434166  | 4.620099  | -2.653381 |
| H  | 7.822604  | -2.413498 | 2.519126  | H    | 3.444818  | 5.051033  | -2.730473 |
| H  | 8.648097  | -0.857988 | 2.935868  | C    | 2.275305  | 3.331210  | -2.121719 |
| H  | 9.583385  | -2.202194 | 2.171426  | H    | 3.154464  | 2.788722  | -1.750156 |
| C  | -1.158305 | 3.652966  | 2.426778  | C    | 2.317798  | 0.193436  | -1.534525 |
| H  | -1.963770 | 4.400521  | 2.549602  | C    | 2.692259  | -0.823725 | -0.634124 |
| C  | -0.983206 | 3.108159  | 1.091096  | H    | 2.053452  | -1.031675 | 0.233484  |
| C  | -0.572518 | 3.337387  | -0.111873 | C    | 3.865099  | -1.569016 | -0.840639 |
| C  | -0.283941 | 4.311488  | -1.135176 | H    | 4.131834  | -2.365426 | -0.131302 |
| C  | 0.974451  | 4.326874  | -1.786096 | C    | 4.686087  | -1.296733 | -1.944681 |
| H  | 1.720732  | 3.564706  | -1.513866 | H    | 5.616215  | -1.865672 | -2.096462 |
| C  | 1.241724  | 5.295142  | -2.762230 | C    | 4.300141  | -0.309087 | -2.871152 |
| C  | 0.267813  | 6.247081  | -3.116587 | H    | 4.921283  | -0.111716 | -3.759059 |
| H  | 0.482561  | 6.997170  | -3.894227 | C    | 3.116307  | 0.420388  | -2.678408 |
| C  | -0.986368 | 6.233026  | -2.478397 | H    | 2.812661  | 1.168516  | -3.425225 |

|   |           |           |           |    |           |           |           |
|---|-----------|-----------|-----------|----|-----------|-----------|-----------|
| C | -0.466975 | 0.183945  | -2.244752 | C  | -2.206443 | -4.148728 | -3.176770 |
| C | -1.046878 | 0.793022  | -3.378851 | H  | -2.541124 | -5.026671 | -2.593320 |
| H | -0.702632 | 1.779905  | -3.710195 | H  | -1.161014 | -4.301711 | -3.509494 |
| C | -2.071125 | 0.173517  | -4.101759 | H  | -2.878706 | -4.009309 | -4.046665 |
| H | -2.544898 | 0.684055  | -4.952905 | Cl | 2.496451  | -5.015076 | -1.098368 |
| C | -2.522350 | -1.097482 | -3.723783 | Cl | -3.930573 | -1.762958 | -4.525905 |
| C | -1.882849 | -1.799892 | -2.677861 | O  | 1.458460  | 0.500763  | 2.176071  |
| C | -0.863663 | -1.148391 | -1.922173 | O  | 3.112780  | 2.409525  | 0.782588  |
| C | -0.196287 | -2.003180 | -0.888866 | O  | 3.086500  | -1.651396 | 3.035376  |
| C | 0.638846  | -3.042892 | -1.377824 | O  | 8.389430  | -1.467217 | 1.357574  |
| C | 1.371351  | -3.834312 | -0.468412 | N  | 2.772919  | 0.438550  | 2.011576  |
| C | 1.239959  | -3.653013 | 0.916699  | C  | 3.546134  | 1.376772  | 1.283156  |
| H | 1.832976  | -4.266144 | 1.609419  | C  | 3.529851  | -0.678809 | 2.440583  |
| C | 0.359847  | -2.679996 | 1.399340  | C  | 4.919497  | -0.410286 | 1.949547  |
| H | 0.264237  | -2.542305 | 2.484271  | C  | 6.047280  | -1.222698 | 2.037023  |
| C | -0.371751 | -1.858251 | 0.514256  | H  | 5.999137  | -2.171934 | 2.587462  |
| C | -2.904384 | -0.525942 | 0.174692  | C  | 7.220971  | -0.777633 | 1.369861  |
| C | -3.595193 | -1.745938 | 0.015806  | C  | 7.220761  | 0.446498  | 0.652768  |
| H | -3.210827 | -2.664095 | 0.483353  | H  | 8.152124  | 0.741941  | 0.147398  |
| C | -4.746113 | -1.806697 | -0.785006 | C  | 6.070183  | 1.248824  | 0.585172  |
| H | -5.266971 | -2.767280 | -0.911727 | H  | 6.070416  | 2.191950  | 0.018623  |
| C | -5.211777 | -0.654285 | -1.436194 | C  | 4.917985  | 0.806773  | 1.242248  |
| H | -6.107916 | -0.704413 | -2.073156 | C  | 8.453685  | -2.708894 | 2.053549  |
| C | -4.515283 | 0.559547  | -1.296639 | H  | 7.732925  | -3.447556 | 1.638677  |
| H | -4.866534 | 1.461215  | -1.821500 | H  | 8.255265  | -2.578870 | 3.140064  |
| C | -3.367609 | 0.625897  | -0.496110 | H  | 9.482666  | -3.088054 | 1.914700  |
| H | -2.810709 | 1.567400  | -0.390597 | C  | -3.067033 | 2.257121  | 2.793283  |
| C | -1.845013 | -0.975557 | 2.871403  | H  | -4.109598 | 2.228015  | 2.420537  |
| C | -0.899607 | -0.735296 | 3.895978  | C  | -2.100406 | 2.445912  | 1.900189  |
| H | 0.088346  | -0.317846 | 3.635674  | C  | -1.116591 | 2.653724  | 1.044427  |
| C | -1.220640 | -1.032771 | 5.230380  | C  | -0.757497 | 4.012553  | 0.588207  |
| H | -0.474388 | -0.850081 | 6.019415  | C  | 0.589104  | 4.448278  | 0.583128  |
| C | -2.491283 | -1.536649 | 5.564646  | H  | 1.385129  | 3.736392  | 0.848079  |
| H | -2.744441 | -1.747473 | 6.615462  | C  | 0.902236  | 5.768555  | 0.235251  |
| C | -3.434603 | -1.772804 | 4.549565  | C  | -0.114170 | 6.672166  | -0.124381 |
| H | -4.431454 | -2.176014 | 4.787289  | H  | 0.138433  | 7.707660  | -0.402305 |
| C | -3.109676 | -1.506880 | 3.207192  | C  | -1.454489 | 6.245008  | -0.137153 |
| H | -3.847512 | -1.758212 | 2.430418  | H  | -2.255609 | 6.946060  | -0.421449 |
| O | 0.711930  | -3.324598 | -2.714441 | C  | -1.774208 | 4.925531  | 0.212404  |
| C | 1.572536  | -2.518144 | -3.531936 | H  | -2.820953 | 4.582748  | 0.211789  |
| H | 1.221710  | -1.467093 | -3.573804 | C  | -2.861539 | 2.097088  | 4.278483  |
| H | 1.532201  | -2.959719 | -4.545202 | H  | -3.273873 | 1.129224  | 4.638533  |
| H | 2.614761  | -2.543462 | -3.155634 | H  | -3.392664 | 2.898734  | 4.837618  |
| O | -2.266797 | -3.038485 | -2.265422 | H  | -1.787901 | 2.131055  | 4.543511  |

|             |           |           |           |    |           |           |           |
|-------------|-----------|-----------|-----------|----|-----------|-----------|-----------|
| H           | 1.954362  | 6.092568  | 0.236504  | C  | -0.274300 | -2.430228 | -2.259932 |
| C           | -6.350903 | -0.675704 | 1.849410  | C  | 0.976081  | -3.071219 | -2.089585 |
| O           | -6.205115 | -1.847891 | 2.159043  | C  | 1.549688  | -3.175761 | -0.811338 |
| O           | -7.369435 | -0.176588 | 1.128343  | H  | 2.528221  | -3.666354 | -0.709163 |
| C           | -8.318251 | -1.150274 | 0.667626  | C  | 0.907648  | -2.652766 | 0.309850  |
| H           | -9.106448 | -0.579467 | 0.144907  | H  | 1.405420  | -2.733442 | 1.283100  |
| H           | -7.835720 | -1.863796 | -0.030886 | C  | -0.334325 | -1.998840 | 0.177473  |
| H           | -8.750143 | -1.717244 | 1.516660  | C  | -2.831717 | -1.345547 | 1.525903  |
| O           | -5.529251 | 0.335467  | 2.180851  | C  | -3.373448 | -2.637533 | 1.362634  |
| H           | -4.749560 | -0.063970 | 2.635885  | H  | -2.702635 | -3.503060 | 1.251770  |
|             |           |           |           | C  | -4.761293 | -2.817055 | 1.309162  |
| (S)-L2-TS3A |           |           |           | H  | -5.171675 | -3.828496 | 1.160100  |
| Ni          | -0.462164 | 1.063140  | 1.337283  | C  | -5.644322 | -1.719080 | 1.418095  |
| P           | -0.965789 | 1.271880  | -0.753147 | C  | -5.089886 | -0.432746 | 1.589012  |
| P           | -1.021619 | -1.045960 | 1.608059  | H  | -5.759540 | 0.439001  | 1.669879  |
| C           | -1.446113 | 2.968323  | -1.271269 | C  | -3.701525 | -0.245155 | 1.641331  |
| C           | -2.396799 | 3.638344  | -0.465944 | H  | -3.268512 | 0.763275  | 1.751899  |
| H           | -2.812821 | 3.126897  | 0.417011  | C  | -0.558851 | -1.968713 | 3.146863  |
| C           | -2.783190 | 4.949676  | -0.756575 | C  | 0.796519  | -2.100355 | 3.533427  |
| H           | -3.517902 | 5.454061  | -0.109168 | H  | 1.589761  | -1.647741 | 2.919322  |
| C           | -2.209269 | 5.654036  | -1.839195 | C  | 1.138659  | -2.755396 | 4.724083  |
| C           | -1.244309 | 4.989842  | -2.621191 | H  | 2.205216  | -2.851517 | 4.986975  |
| H           | -0.767851 | 5.524099  | -3.459531 | C  | 0.153710  | -3.275362 | 5.592501  |
| C           | -0.864718 | 3.664996  | -2.346297 | C  | -1.195288 | -3.104730 | 5.221233  |
| H           | -0.094298 | 3.182565  | -2.965127 | H  | -1.992040 | -3.479791 | 5.884780  |
| C           | 0.367827  | 0.753003  | -1.905975 | C  | -1.550289 | -2.467703 | 4.020840  |
| C           | 1.583520  | 0.320770  | -1.342413 | H  | -2.614959 | -2.357561 | 3.771672  |
| H           | 1.659777  | 0.302765  | -0.246552 | O  | -0.977683 | -2.231609 | -3.405395 |
| C           | 2.624071  | -0.129242 | -2.162733 | C  | -0.577336 | -2.656924 | -4.704187 |
| H           | 3.562405  | -0.485956 | -1.710346 | H  | -1.393427 | -2.325525 | -5.375018 |
| C           | 2.486755  | -0.143605 | -3.567765 | H  | -0.474223 | -3.758932 | -4.766647 |
| C           | 1.258713  | 0.280394  | -4.121781 | H  | 0.371081  | -2.178133 | -5.017332 |
| H           | 1.128971  | 0.269190  | -5.216602 | O  | -3.145452 | -3.351077 | -1.629547 |
| C           | 0.199983  | 0.708316  | -3.304878 | C  | -3.437028 | -4.139483 | -2.789577 |
| H           | -0.763107 | 0.992428  | -3.756490 | H  | -2.648742 | -4.916249 | -2.853800 |
| C           | -2.376797 | 0.228527  | -1.341870 | H  | -3.409109 | -3.521674 | -3.710053 |
| C           | -3.626007 | 0.799056  | -1.658551 | H  | -4.430090 | -4.626848 | -2.705336 |
| H           | -3.744292 | 1.891759  | -1.664255 | Cl | 1.923737  | -3.760613 | -3.410471 |
| C           | -4.731380 | -0.009157 | -1.946799 | Cl | -6.010461 | -2.408422 | -2.171150 |
| H           | -5.715161 | 0.432517  | -2.162230 | C  | 1.368263  | 1.295307  | 3.689672  |
| C           | -4.591289 | -1.403905 | -1.932332 | H  | 1.091819  | 0.380503  | 4.242233  |
| C           | -3.338250 | -2.004062 | -1.675758 | C  | 0.387892  | 1.938858  | 2.952114  |
| C           | -2.225522 | -1.181705 | -1.362259 | C  | -0.042071 | 2.771377  | 2.034220  |
| C           | -0.919182 | -1.876576 | -1.107197 | C  | -0.224185 | 4.177018  | 1.724414  |

|   |           |           |           |             |           |           |           |
|---|-----------|-----------|-----------|-------------|-----------|-----------|-----------|
| C | 0.479554  | 4.741405  | 0.631933  | H           | 0.935688  | -5.007298 | 6.644146  |
| H | 1.159801  | 4.099027  | 0.054809  | H           | 1.335606  | -3.448509 | 7.412311  |
| C | 0.314698  | 6.094897  | 0.313020  | C           | -7.136591 | -1.907642 | 1.300699  |
| C | -0.557711 | 6.905033  | 1.063702  | H           | -7.453059 | -2.907292 | 1.660659  |
| H | -0.684034 | 7.968978  | 0.808437  | H           | -7.694105 | -1.136324 | 1.869222  |
| C | -1.264852 | 6.348404  | 2.144002  | H           | -7.447146 | -1.830357 | 0.235850  |
| H | -1.951143 | 6.974753  | 2.736273  |             |           |           |           |
| C | -1.100459 | 4.995102  | 2.477045  | (S)-L2-TS3B |           |           |           |
| H | -1.655071 | 4.552684  | 3.318851  | Ni          | -0.412095 | 0.949347  | 1.436951  |
| C | 2.666739  | 1.952567  | 4.054258  | P           | -1.004231 | 1.406331  | -0.585231 |
| H | 3.496405  | 1.214745  | 4.056622  | P           | -0.898777 | -1.197719 | 1.432956  |
| H | 2.600164  | 2.367924  | 5.085616  | C           | -1.542215 | 3.137022  | -0.890343 |
| H | 2.909275  | 2.772998  | 3.353589  | C           | -2.415496 | 3.717418  | 0.057490  |
| H | 0.867885  | 6.521138  | -0.538288 | H           | -2.737230 | 3.123113  | 0.927900  |
| O | 1.996900  | 0.161349  | 1.975671  | C           | -2.838046 | 5.042922  | -0.078576 |
| O | 3.165462  | 2.457947  | 0.749620  | H           | -3.507210 | 5.479126  | 0.679965  |
| O | 3.840396  | -2.020349 | 1.807431  | C           | -2.380645 | 5.845416  | -1.148104 |
| O | 8.305253  | -1.060370 | -1.375675 | C           | -1.502061 | 5.263021  | -2.082882 |
| N | 3.217996  | 0.221477  | 1.480819  | H           | -1.121601 | 5.872451  | -2.918947 |
| C | 3.724963  | 1.372023  | 0.796019  | C           | -1.085772 | 3.926861  | -1.960926 |
| C | 4.062041  | -0.905912 | 1.346606  | H           | -0.381422 | 3.508588  | -2.694580 |
| C | 5.206758  | -0.435312 | 0.502274  | C           | 0.339765  | 1.081246  | -1.790887 |
| C | 6.292280  | -1.163493 | 0.018516  | C           | 1.603048  | 0.737012  | -1.270701 |
| H | 6.404128  | -2.223311 | 0.284063  | H           | 1.711897  | 0.674568  | -0.177891 |
| C | 7.210052  | -0.479839 | -0.824908 | C           | 2.662840  | 0.437898  | -2.134649 |
| C | 7.011512  | 0.888574  | -1.144559 | H           | 3.643757  | 0.158151  | -1.720018 |
| H | 7.748157  | 1.370455  | -1.804440 | C           | 2.492840  | 0.478114  | -3.535524 |
| C | 5.909608  | 1.599743  | -0.641956 | C           | 1.217679  | 0.805890  | -4.044407 |
| H | 5.751197  | 2.657238  | -0.901678 | H           | 1.056498  | 0.811051  | -5.134445 |
| C | 5.005980  | 0.923159  | 0.184737  | C           | 0.146707  | 1.099267  | -3.187087 |
| C | 8.555311  | -2.436778 | -1.103892 | H           | -0.850095 | 1.306406  | -3.605308 |
| H | 7.726488  | -3.081983 | -1.469664 | C           | -2.416289 | 0.425315  | -1.268282 |
| H | 8.704351  | -2.618130 | -0.016855 | C           | -3.680812 | 1.020150  | -1.453431 |
| H | 9.483380  | -2.694833 | -1.646063 | H           | -3.808515 | 2.103034  | -1.318809 |
| C | -2.592291 | 7.088133  | -2.106781 | C           | -4.786309 | 0.234691  | -1.785629 |
| H | -2.266700 | 7.739080  | -1.266872 | H           | -5.783194 | 0.684795  | -1.899811 |
| H | -2.126462 | 7.472200  | -3.035638 | C           | -4.652245 | -1.154201 | -1.943439 |
| H | -3.692685 | 7.205725  | -2.196554 | C           | -3.383092 | -1.771853 | -1.831428 |
| C | 3.619029  | -0.632626 | -4.436964 | C           | -2.263348 | -0.965753 | -1.472839 |
| H | 3.426634  | -0.442310 | -5.511428 | C           | -0.931695 | -1.647937 | -1.373387 |
| H | 4.577002  | -0.144503 | -4.161385 | C           | -0.332687 | -2.012498 | -2.612082 |
| H | 3.758667  | -1.726692 | -4.304054 | C           | 0.954445  | -2.591989 | -2.613796 |
| C | 0.538182  | -3.992353 | 6.864543  | C           | 1.614237  | -2.862257 | -1.407202 |
| H | -0.328377 | -4.114215 | 7.544434  | H           | 2.620422  | -3.304876 | -1.423257 |

|    |           |           |           |   |           |           |           |
|----|-----------|-----------|-----------|---|-----------|-----------|-----------|
| C  | 1.009576  | -2.531719 | -0.191821 | C | -0.959645 | 6.199747  | 2.703539  |
| H  | 1.569894  | -2.731501 | 0.727065  | H | -1.560653 | 6.797501  | 3.407478  |
| C  | -0.256958 | -1.913021 | -0.152284 | C | -0.820866 | 4.818707  | 2.909442  |
| C  | -2.706970 | -1.533080 | 1.361309  | H | -1.312808 | 4.325408  | 3.761887  |
| C  | -3.217272 | -2.821722 | 1.102621  | H | 0.918014  | 6.522639  | -0.150249 |
| H  | -2.525411 | -3.652225 | 0.895299  | O | 2.071150  | -0.112424 | 1.997360  |
| C  | -4.600942 | -3.041921 | 1.096347  | O | 3.359839  | 2.311750  | 1.240291  |
| H  | -4.989827 | -4.051310 | 0.885176  | O | 3.833012  | -2.310647 | 1.410636  |
| C  | -5.509460 | -1.990223 | 1.350475  | O | 8.378573  | -0.960082 | -1.492567 |
| C  | -4.985065 | -0.705787 | 1.611979  | N | 3.291062  | -0.024197 | 1.493779  |
| H  | -5.674863 | 0.131775  | 1.805780  | C | 3.865259  | 1.213023  | 1.060128  |
| C  | -3.602423 | -0.478087 | 1.619262  | C | 4.093926  | -1.135321 | 1.164313  |
| H  | -3.192570 | 0.528597  | 1.806641  | C | 5.268754  | -0.565833 | 0.428663  |
| C  | -0.406869 | -2.340298 | 2.809448  | C | 6.331239  | -1.236462 | -0.173644 |
| C  | 0.938728  | -2.689081 | 3.064172  | H | 6.391864  | -2.331553 | -0.116525 |
| H  | 1.752266  | -2.252915 | 2.470136  | C | 7.297082  | -0.445659 | -0.854830 |
| C  | 1.270849  | -3.524044 | 4.140169  | C | 7.166579  | 0.966203  | -0.903168 |
| H  | 2.330781  | -3.784688 | 4.296617  | H | 7.938288  | 1.532030  | -1.445896 |
| C  | 0.293044  | -4.002050 | 5.037444  | C | 6.086429  | 1.617529  | -0.284178 |
| C  | -1.040733 | -3.600197 | 4.815865  | H | 5.981623  | 2.711901  | -0.331971 |
| H  | -1.830467 | -3.930428 | 5.510920  | C | 5.136255  | 0.836111  | 0.381810  |
| C  | -1.389276 | -2.793890 | 3.721419  | C | 8.563116  | -2.372891 | -1.487280 |
| H  | -2.443040 | -2.514158 | 3.583950  | H | 7.715260  | -2.897574 | -1.980289 |
| O  | -1.025355 | -1.688821 | -3.740526 | H | 8.681207  | -2.765730 | -0.453527 |
| C  | -1.259375 | -2.680507 | -4.743145 | H | 9.490444  | -2.565317 | -2.057341 |
| H  | -2.276126 | -2.492752 | -5.143680 | C | 1.266142  | 0.013274  | 4.797274  |
| H  | -1.219973 | -3.704087 | -4.316650 | H | 0.280958  | -0.470754 | 4.666512  |
| H  | -0.521612 | -2.606019 | -5.567898 | H | 2.048937  | -0.768957 | 4.812667  |
| O  | -3.099618 | -3.094486 | -1.948100 | H | 1.283856  | 0.516664  | 5.791871  |
| C  | -3.852642 | -3.998532 | -2.755417 | H | 2.540215  | 1.487335  | 3.720174  |
| H  | -3.164046 | -4.835776 | -2.982503 | C | -2.789069 | 7.294072  | -1.244900 |
| H  | -4.181885 | -3.527044 | -3.703664 | H | -2.343122 | 7.877089  | -0.410049 |
| H  | -4.738777 | -4.389653 | -2.217404 | H | -2.455485 | 7.753614  | -2.196125 |
| Cl | 1.791276  | -2.915232 | -4.123700 | H | -3.890054 | 7.413596  | -1.168290 |
| Cl | -6.133795 | -2.068198 | -2.209560 | C | -7.000708 | -2.215989 | 1.307847  |
| C  | 1.532391  | 1.031341  | 3.736854  | H | -7.255397 | -3.290197 | 1.403792  |
| C  | 0.551764  | 1.726210  | 3.052548  | H | -7.521392 | -1.659163 | 2.113648  |
| C  | 0.091797  | 2.603057  | 2.197443  | H | -7.414889 | -1.862921 | 0.338792  |
| C  | -0.054824 | 4.035981  | 2.013082  | C | 0.660119  | -4.913752 | 6.183566  |
| C  | 0.569302  | 4.666709  | 0.909844  | H | -0.089211 | -4.868824 | 6.999268  |
| H  | 1.164457  | 4.054344  | 0.217585  | H | 0.716673  | -5.972256 | 5.845992  |
| C  | 0.429470  | 6.046213  | 0.713848  | H | 1.652672  | -4.657110 | 6.606917  |
| C  | -0.336315 | 6.819613  | 1.606150  | C | 3.647277  | 0.143687  | -4.447800 |
| H  | -0.444060 | 7.904208  | 1.447583  | H | 3.394535  | 0.317546  | -5.512299 |

|             |           |           |           |   |           |           |           |
|-------------|-----------|-----------|-----------|---|-----------|-----------|-----------|
| H           | 4.544471  | 0.748149  | -4.198336 | H | -1.583974 | 7.793441  | -2.070927 |
| H           | 3.931059  | -0.924399 | -4.337858 | C | -2.259248 | 6.285377  | -0.648951 |
|             |           |           |           | H | -3.279287 | 6.695381  | -0.577985 |
| (S)-L3-TS3A |           |           |           | C | -1.915413 | 5.143081  | 0.088653  |
| Ni          | -0.650453 | 1.576550  | 0.807821  | H | -2.654445 | 4.645486  | 0.735777  |
| P           | -1.613768 | 1.087825  | -1.053607 | C | 2.964113  | 3.161090  | 2.348815  |
| P           | -0.856602 | -0.297614 | 1.953329  | H | 3.751415  | 2.392660  | 2.499675  |
| C           | -2.986143 | -0.142590 | -0.896650 | H | 3.110145  | 3.931404  | 3.139805  |
| C           | -4.323283 | 0.262858  | -1.103019 | H | 3.107731  | 3.632644  | 1.359352  |
| H           | -4.539573 | 1.255676  | -1.518921 | H | 0.741132  | 6.853559  | -2.219918 |
| C           | -5.389671 | -0.573230 | -0.757019 | O | 1.899189  | 0.796547  | 1.252207  |
| H           | -6.431189 | -0.243336 | -0.884264 | O | 3.219478  | 2.188176  | -0.867883 |
| C           | -5.136807 | -1.831375 | -0.189691 | O | 3.592018  | -1.328418 | 2.153696  |
| C           | -3.809486 | -2.295318 | -0.032321 | O | 8.254831  | -2.053942 | -0.803363 |
| C           | -2.732836 | -1.444518 | -0.399929 | N | 3.070872  | 0.481544  | 0.749454  |
| C           | -1.354277 | -2.012193 | -0.258769 | C | 3.678787  | 1.184952  | -0.339603 |
| C           | -0.927792 | -2.897214 | -1.285327 | C | 3.866912  | -0.590445 | 1.210753  |
| C           | 0.361894  | -3.471060 | -1.203210 | C | 5.060411  | -0.609752 | 0.306556  |
| C           | 1.186471  | -3.220137 | -0.096110 | C | 6.143485  | -1.486706 | 0.305086  |
| H           | 2.186395  | -3.676384 | -0.054909 | H | 6.194740  | -2.296621 | 1.045155  |
| C           | 0.761162  | -2.347237 | 0.909404  | C | 7.147761  | -1.279159 | -0.679696 |
| H           | 1.450230  | -2.122000 | 1.733532  | C | 7.033853  | -0.214044 | -1.609741 |
| C           | -0.497127 | -1.711456 | 0.825843  | H | 7.837746  | -0.095666 | -2.351378 |
| O           | -1.778895 | -3.050423 | -2.340618 | C | 5.932700  | 0.657920  | -1.584244 |
| C           | -2.070979 | -4.353808 | -2.853429 | H | 5.847717  | 1.482741  | -2.307887 |
| H           | -3.135379 | -4.338510 | -3.163526 | C | 4.942627  | 0.448022  | -0.617828 |
| H           | -1.928296 | -5.135762 | -2.079044 | C | 8.427239  | -3.143234 | 0.098681  |
| H           | -1.437886 | -4.598472 | -3.730200 | H | 7.599909  | -3.881380 | 0.010784  |
| O           | -3.467826 | -3.486170 | 0.535068  | H | 8.492260  | -2.794676 | 1.152870  |
| C           | -4.088090 | -4.703055 | 0.106526  | H | 9.379335  | -3.629433 | -0.182523 |
| H           | -3.304626 | -5.486049 | 0.149528  | C | -0.498299 | 0.389689  | -2.331641 |
| H           | -4.464957 | -4.621166 | -0.933767 | C | 0.810827  | 1.116915  | -2.621129 |
| H           | -4.928101 | -4.987986 | 0.771678  | C | 0.837416  | -0.209501 | -1.923740 |
| Cl          | 1.024794  | -4.394535 | -2.544592 | H | -1.017982 | -0.090557 | -3.178236 |
| Cl          | -6.498244 | -2.759749 | 0.419517  | H | 1.063260  | 1.996194  | -2.007345 |
| C           | 1.594940  | 2.558990  | 2.474521  | H | 1.126673  | 1.180184  | -3.674723 |
| H           | 1.390314  | 1.960524  | 3.378986  | H | 1.164772  | -1.104202 | -2.474055 |
| C           | 0.515621  | 2.970822  | 1.722541  | H | 1.070624  | -0.203625 | -0.847650 |
| C           | -0.234589 | 3.406613  | 0.739864  | C | -2.447915 | 2.478886  | -1.912840 |
| C           | -0.605013 | 4.612774  | 0.019337  | C | -1.733266 | 3.343499  | -2.929262 |
| C           | 0.349103  | 5.245738  | -0.816209 | C | -2.865109 | 2.448425  | -3.373516 |
| H           | 1.362771  | 4.820465  | -0.879162 | H | -3.106864 | 3.032055  | -1.222509 |
| C           | -0.006175 | 6.376422  | -1.566213 | H | -0.711066 | 3.063120  | -3.220163 |
| C           | -1.308981 | 6.902888  | -1.484395 | H | -1.905489 | 4.428543  | -2.857055 |

|             |           |           |           |    |           |           |           |
|-------------|-----------|-----------|-----------|----|-----------|-----------|-----------|
| H           | -3.832719 | 2.905393  | -3.638205 | O  | -3.622386 | -3.343855 | 0.310804  |
| H           | -2.614162 | 1.550642  | -3.961703 | C  | -4.289299 | -4.508311 | -0.187533 |
| C           | -2.521249 | -0.599954 | 2.668362  | H  | -3.548770 | -5.332280 | -0.151185 |
| C           | -3.073164 | 0.465457  | 3.614534  | H  | -4.624753 | -4.365469 | -1.235301 |
| C           | -3.684461 | 0.282072  | 2.256863  | H  | -5.165249 | -4.774875 | 0.437570  |
| H           | -2.755542 | -1.652906 | 2.899149  | Cl | 0.969895  | -4.348399 | -2.567078 |
| H           | -2.463077 | 1.371072  | 3.771288  | Cl | -6.612222 | -2.462995 | 0.114097  |
| H           | -3.616421 | 0.117189  | 4.507396  | C  | 1.694088  | 2.576450  | 2.566389  |
| H           | -4.670522 | -0.198089 | 2.165384  | C  | 0.662650  | 2.994400  | 1.758051  |
| H           | -3.469873 | 1.054831  | 1.501610  | C  | -0.026091 | 3.398680  | 0.722840  |
| C           | 0.287552  | -0.636195 | 3.349372  | C  | -0.208771 | 4.588274  | -0.094895 |
| C           | -0.014989 | -0.294663 | 4.794937  | C  | 0.849961  | 5.006131  | -0.939547 |
| C           | 0.059031  | -1.740990 | 4.360738  | H  | 1.787024  | 4.427780  | -0.932442 |
| H           | 1.324909  | -0.464404 | 3.016605  | C  | 0.690729  | 6.126158  | -1.768698 |
| H           | -1.005530 | 0.108084  | 5.051398  | C  | -0.514550 | 6.853296  | -1.758002 |
| H           | 0.813671  | 0.120265  | 5.391666  | H  | -0.634869 | 7.735010  | -2.406833 |
| H           | 0.933338  | -2.344386 | 4.653735  | C  | -1.565418 | 6.449698  | -0.912660 |
| H           | -0.886971 | -2.304615 | 4.311685  | H  | -2.508593 | 7.018746  | -0.896160 |
|             |           |           |           | C  | -1.419136 | 5.319668  | -0.093854 |
| (S)-L3-TS3B |           |           |           | H  | -2.238047 | 4.991813  | 0.565329  |
| Ni          | -0.580223 | 1.614447  | 0.898028  | H  | 1.516833  | 6.438640  | -2.427122 |
| P           | -1.487915 | 1.195798  | -1.006262 | O  | 1.912817  | 0.681738  | 1.543431  |
| P           | -0.942756 | -0.289498 | 1.967787  | O  | 3.235099  | 2.224544  | -0.448099 |
| C           | -2.926468 | 0.033722  | -0.938986 | O  | 3.538628  | -1.600016 | 2.175891  |
| C           | -4.233814 | 0.518765  | -1.165085 | O  | 8.055388  | -2.230639 | -1.021362 |
| H           | -4.386621 | 1.541896  | -1.531963 | N  | 3.064201  | 0.369287  | 0.984980  |
| C           | -5.351380 | -0.278304 | -0.899920 | C  | 3.665260  | 1.149528  | -0.048546 |
| H           | -6.369930 | 0.110849  | -1.044379 | C  | 3.818990  | -0.778482 | 1.306521  |
| C           | -5.182890 | -1.575806 | -0.391810 | C  | 4.977437  | -0.761933 | 0.354974  |
| C           | -3.886931 | -2.113325 | -0.210961 | C  | 6.014042  | -1.683220 | 0.221279  |
| C           | -2.757732 | -1.300246 | -0.497876 | H  | 6.050244  | -2.566903 | 0.872561  |
| C           | -1.411338 | -1.927463 | -0.321733 | C  | 6.993394  | -1.421495 | -0.776088 |
| C           | -0.979208 | -2.809016 | -1.349880 | C  | 6.901902  | -0.261686 | -1.587022 |
| C           | 0.288637  | -3.423385 | -1.235557 | H  | 7.684366  | -0.104870 | -2.344311 |
| C           | 1.084610  | -3.211911 | -0.099100 | C  | 5.847943  | 0.654192  | -1.428218 |
| H           | 2.070314  | -3.695236 | -0.033214 | H  | 5.780022  | 1.553143  | -2.059492 |
| C           | 0.653395  | -2.342549 | 0.905968  | C  | 4.882548  | 0.391025  | -0.450583 |
| H           | 1.323759  | -2.150883 | 1.753368  | C  | 8.201950  | -3.415154 | -0.243794 |
| C           | -0.584190 | -1.670484 | 0.795023  | H  | 7.335657  | -4.100348 | -0.375299 |
| O           | -1.802070 | -2.916175 | -2.433158 | H  | 8.319868  | -3.182961 | 0.837597  |
| C           | -2.105213 | -4.197765 | -2.992084 | H  | 9.118130  | -3.913778 | -0.609924 |
| H           | -3.154772 | -4.145517 | -3.345447 | C  | 1.539545  | 2.183575  | 4.003155  |
| H           | -2.015672 | -5.002386 | -2.233139 | H  | 0.508710  | 1.849044  | 4.220947  |
| H           | -1.442611 | -4.437328 | -3.848122 | H  | 2.246248  | 1.374618  | 4.274388  |

|             |           |           |           |    |           |           |           |
|-------------|-----------|-----------|-----------|----|-----------|-----------|-----------|
| H           | 1.774864  | 3.057444  | 4.653260  | C  | -4.573935 | -1.650047 | -1.362170 |
| H           | 2.714018  | 2.838368  | 2.227572  | C  | -3.315481 | -2.209288 | -1.037259 |
| C           | -0.326901 | 0.457040  | -2.220697 | C  | -2.174247 | -1.361925 | -0.983054 |
| C           | 1.001111  | 1.168549  | -2.459698 | C  | -0.876286 | -1.991578 | -0.578970 |
| C           | 0.981798  | -0.142851 | -1.735344 | C  | -0.229311 | -2.838683 | -1.524456 |
| H           | -0.811667 | -0.032348 | -3.082699 | C  | 1.030299  | -3.391433 | -1.187639 |
| H           | 1.226489  | 2.061135  | -1.854888 | C  | 1.598940  | -3.154937 | 0.075940  |
| H           | 1.368830  | 1.206167  | -3.497626 | H  | 2.583235  | -3.586729 | 0.307674  |
| H           | 1.332164  | -1.050668 | -2.248387 | C  | 0.947509  | -2.350387 | 1.012386  |
| H           | 1.153900  | -0.115938 | -0.648396 | H  | 1.416064  | -2.164928 | 1.985957  |
| C           | -2.212286 | 2.621496  | -1.909512 | C  | -0.290262 | -1.761731 | 0.690716  |
| C           | -1.463004 | 3.379371  | -2.985010 | O  | -0.866017 | -2.953340 | -2.722585 |
| C           | -2.663282 | 2.546388  | -3.359425 | C  | -0.849968 | -4.165462 | -3.481017 |
| H           | -2.817078 | 3.252930  | -1.237076 | H  | -1.799213 | -4.177789 | -4.052141 |
| H           | -0.470441 | 3.012877  | -3.280923 | H  | -0.806075 | -5.057154 | -2.822876 |
| H           | -1.556633 | 4.476027  | -2.965202 | H  | 0.003531  | -4.194602 | -4.186780 |
| H           | -3.603337 | 3.055048  | -3.629117 | O  | -3.117007 | -3.498260 | -0.656109 |
| H           | -2.490766 | 1.601938  | -3.901426 | C  | -3.662920 | -4.583136 | -1.415847 |
| C           | -2.670576 | -0.516342 | 2.553122  | H  | -2.922767 | -5.405307 | -1.357605 |
| C           | -3.192039 | 0.517268  | 3.549666  | H  | -3.809838 | -4.297441 | -2.477252 |
| C           | -3.726813 | 0.493701  | 2.148231  | H  | -4.628918 | -4.926796 | -0.995686 |
| H           | -3.002717 | -1.560015 | 2.684986  | Cl | 1.990023  | -4.301633 | -2.342571 |
| H           | -2.518648 | 1.348911  | 3.818669  | Cl | -6.040141 | -2.601311 | -1.254314 |
| H           | -3.822236 | 0.152187  | 4.376355  | C  | 1.297713  | 2.281435  | 3.360640  |
| H           | -4.742371 | 0.113740  | 1.960486  | H  | 0.918143  | 1.640373  | 4.172773  |
| H           | -3.396715 | 1.299211  | 1.472326  | C  | 0.402943  | 2.824706  | 2.451984  |
| C           | 0.069063  | -0.807919 | 3.413630  | C  | 0.051320  | 3.330490  | 1.300777  |
| C           | -0.389312 | -0.747052 | 4.856163  | C  | -0.090985 | 4.561326  | 0.545116  |
| C           | -0.221061 | -2.085630 | 4.177979  | C  | 0.662429  | 4.734438  | -0.643841 |
| H           | 1.126874  | -0.568835 | 3.216074  | H  | 1.361593  | 3.939288  | -0.939958 |
| H           | -1.414008 | -0.413041 | 5.074463  | C  | 0.516801  | 5.901161  | -1.404649 |
| H           | 0.360374  | -0.434537 | 5.600990  | C  | -0.392239 | 6.901452  | -1.011779 |
| H           | 0.640082  | -2.718695 | 4.446175  | H  | -0.518998 | 7.806189  | -1.625843 |
| H           | -1.133752 | -2.647993 | 3.919799  | C  | -1.144569 | 6.732604  | 0.164021  |
|             |           |           |           | H  | -1.858230 | 7.510782  | 0.478480  |
| (S)-L4-TS3A |           |           |           | C  | -0.994890 | 5.574308  | 0.943455  |
| Ni          | -0.414091 | 1.502441  | 1.054632  | H  | -1.586889 | 5.433093  | 1.860710  |
| P           | -0.848467 | 1.142922  | -0.990673 | C  | 2.686405  | 2.829032  | 3.523699  |
| P           | -0.991370 | -0.457821 | 1.770477  | H  | 3.405155  | 2.011272  | 3.739290  |
| C           | -2.299811 | 0.020049  | -1.282374 | H  | 2.718195  | 3.527639  | 4.390022  |
| C           | -3.555440 | 0.533315  | -1.664540 | H  | 3.008763  | 3.372049  | 2.616219  |
| H           | -3.671070 | 1.596016  | -1.916316 | H  | 1.108376  | 6.025924  | -2.325010 |
| C           | -4.683061 | -0.292115 | -1.700953 | O  | 1.661700  | 0.535200  | 2.192925  |
| H           | -5.670795 | 0.115017  | -1.961310 | O  | 2.704624  | 2.347756  | 0.242395  |



|   |           |           |           |             |           |           |           |
|---|-----------|-----------|-----------|-------------|-----------|-----------|-----------|
| O | 3.567683  | -1.597262 | 2.555002  | H           | -5.072613 | -3.364508 | 2.365273  |
| O | 7.643690  | -1.734730 | -1.223502 | C           | -0.646401 | -0.950804 | 3.527677  |
| N | 2.805883  | 0.394367  | 1.554417  | N           | -0.165632 | -2.165901 | 3.835874  |
| C | 3.234738  | 1.281556  | 0.515329  | C           | -0.966335 | -0.006062 | 4.524827  |
| C | 3.681505  | -0.704602 | 1.723306  | C           | 0.033786  | -2.419954 | 5.142256  |
| C | 4.715557  | -0.539957 | 0.651503  | C           | -0.745218 | -0.397252 | 5.851542  |
| C | 5.770340  | -1.388487 | 0.317900  | H           | -1.373304 | 0.983112  | 4.261675  |
| H | 5.935512  | -2.310703 | 0.891168  | N           | -0.231332 | -1.601876 | 6.173231  |
| C | 6.590469  | -1.005833 | -0.778114 | H           | 0.454243  | -3.412419 | 5.388556  |
| C | 6.336053  | 0.201243  | -1.480939 | H           | -0.983713 | 0.283373  | 6.689002  |
| H | 6.999427  | 0.451095  | -2.322091 |             |           |           |           |
| C | 5.269595  | 1.039917  | -1.120887 | (S)-L4-TS3B |           |           |           |
| H | 5.065243  | 1.967682  | -1.676080 | Ni          | -0.220306 | 1.291405  | 1.197845  |
| C | 4.454999  | 0.651476  | -0.051387 | P           | -0.725391 | 1.174803  | -0.866913 |
| C | 7.938776  | -2.969233 | -0.575920 | P           | -0.916736 | -0.723088 | 1.702408  |
| H | 7.087695  | -3.681396 | -0.649720 | C           | -2.361836 | 0.407891  | -1.177009 |
| H | 8.194375  | -2.817655 | 0.495808  | C           | -3.505883 | 1.218515  | -1.332503 |
| H | 8.814079  | -3.392310 | -1.101908 | H           | -3.388724 | 2.297382  | -1.494573 |
| C | 0.419176  | 0.292989  | -2.062984 | C           | -4.780463 | 0.645888  | -1.312031 |
| N | 1.600700  | -0.023517 | -1.504219 | H           | -5.679593 | 1.271871  | -1.408210 |
| C | 0.108967  | -0.060161 | -3.389314 | C           | -4.935898 | -0.739844 | -1.140224 |
| C | 2.456550  | -0.725384 | -2.268326 | C           | -3.804486 | -1.582376 | -1.025279 |
| C | 1.093725  | -0.763452 | -4.096069 | C           | -2.508254 | -0.992904 | -1.013635 |
| H | -0.860765 | 0.187617  | -3.840035 | C           | -1.340807 | -1.910482 | -0.818883 |
| N | 2.269546  | -1.109797 | -3.542135 | C           | -0.964460 | -2.717527 | -1.930856 |
| H | 3.408563  | -1.020757 | -1.794850 | C           | 0.170424  | -3.554825 | -1.812430 |
| H | 0.925065  | -1.069927 | -5.144308 | C           | 0.874213  | -3.635036 | -0.599548 |
| C | -1.315326 | 2.626468  | -2.008713 | H           | 1.755486  | -4.290467 | -0.540542 |
| N | -0.752562 | 2.828739  | -3.211656 | C           | 0.495837  | -2.854141 | 0.496511  |
| C | -2.215595 | 3.555698  | -1.447914 | H           | 1.079578  | -2.872384 | 1.429140  |
| C | -1.105787 | 3.955189  | -3.858348 | C           | -0.606754 | -1.982362 | 0.393201  |
| C | -2.532305 | 4.673768  | -2.230580 | O           | -1.691661 | -2.526682 | -3.060844 |
| H | -2.632356 | 3.407902  | -0.440567 | C           | -2.066868 | -3.620246 | -3.904693 |
| N | -1.980422 | 4.883945  | -3.442130 | H           | -3.043924 | -3.342861 | -4.346607 |
| H | -0.626932 | 4.126118  | -4.840373 | H           | -2.178927 | -4.559609 | -3.325265 |
| H | -3.243907 | 5.434481  | -1.865145 | H           | -1.330303 | -3.780365 | -4.716466 |
| C | -2.813265 | -0.869308 | 1.834744  | O           | -3.842786 | -2.923558 | -0.821903 |
| N | -3.669974 | 0.153796  | 1.658778  | C           | -4.720841 | -3.766094 | -1.576671 |
| C | -3.257426 | -2.176003 | 2.116008  | H           | -4.188461 | -4.729505 | -1.700831 |
| C | -4.979302 | -0.149900 | 1.734322  | H           | -4.937034 | -3.334571 | -2.575366 |
| C | -4.644585 | -2.365328 | 2.168453  | H           | -5.675637 | -3.940752 | -1.042547 |
| H | -2.545966 | -3.001124 | 2.266047  | Cl          | 0.822702  | -4.413926 | -3.194733 |
| N | -5.516903 | -1.356200 | 1.976660  | Cl          | -6.562226 | -1.367875 | -0.964537 |
| H | -5.685182 | 0.686819  | 1.579367  | C           | 1.564007  | 2.017490  | 3.426076  |

|   |           |           |           |             |           |           |           |
|---|-----------|-----------|-----------|-------------|-----------|-----------|-----------|
| C | 0.656246  | 2.636744  | 2.601614  | N           | 0.528585  | -2.409304 | 5.748429  |
| C | 0.043591  | 3.131724  | 1.565036  | H           | 2.186768  | -3.002291 | 4.610169  |
| C | -0.298024 | 4.398384  | 0.946955  | H           | -1.248365 | -1.726140 | 6.617370  |
| C | 0.666160  | 5.435086  | 0.888785  | C           | -2.767233 | -0.779037 | 1.902929  |
| H | 1.645856  | 5.273913  | 1.363303  | N           | -3.337468 | -1.982612 | 2.105905  |
| C | 0.386467  | 6.624085  | 0.200884  | C           | -3.513824 | 0.410445  | 1.885976  |
| C | -0.861630 | 6.804359  | -0.423480 | C           | -4.670406 | -1.987092 | 2.266613  |
| H | -1.074729 | 7.733572  | -0.973786 | C           | -4.898940 | 0.277557  | 2.072799  |
| C | -1.833439 | 5.789083  | -0.353239 | H           | -3.021194 | 1.380482  | 1.716636  |
| H | -2.809498 | 5.925230  | -0.843882 | N           | -5.487116 | -0.917123 | 2.265193  |
| C | -1.550938 | 4.592939  | 0.318084  | H           | -5.145569 | -2.973672 | 2.416744  |
| H | -2.290977 | 3.778615  | 0.352804  | H           | -5.558335 | 1.164004  | 2.065772  |
| H | 1.149867  | 7.415834  | 0.143786  | C           | -0.596489 | 2.700118  | -1.922913 |
| O | 1.966153  | 0.398734  | 2.061134  | N           | -1.619798 | 3.138687  | -2.670617 |
| O | 2.958237  | 2.234369  | 0.139554  | C           | 0.635670  | 3.384331  | -1.870680 |
| O | 3.867591  | -1.759423 | 2.346611  | C           | -1.409930 | 4.264639  | -3.376648 |
| O | 8.011913  | -1.706289 | -1.359120 | C           | 0.728530  | 4.548537  | -2.643384 |
| N | 3.129913  | 0.291948  | 1.445304  | H           | 1.469326  | 3.033844  | -1.239523 |
| C | 3.552232  | 1.201815  | 0.433689  | N           | -0.288711 | 4.999456  | -3.405780 |
| C | 3.998707  | -0.826451 | 1.568500  | H           | -2.256191 | 4.619664  | -3.993645 |
| C | 5.049973  | -0.607006 | 0.519502  | H           | 1.655692  | 5.148665  | -2.642748 |
| C | 6.116876  | -1.431890 | 0.169811  | C           | 0.460210  | 0.145103  | -1.881155 |
| H | 6.285641  | -2.370786 | 0.714249  | N           | 0.234499  | 0.066625  | -3.204733 |
| C | 6.943735  | -1.005969 | -0.906222 | C           | 1.571489  | -0.450106 | -1.270248 |
| C | 6.675139  | 0.213557  | -1.580685 | C           | 1.136040  | -0.633041 | -3.913962 |
| H | 7.340101  | 0.494782  | -2.410585 | C           | 2.456803  | -1.133160 | -2.117782 |
| C | 5.594479  | 1.027930  | -1.206505 | H           | 1.692549  | -0.395550 | -0.182611 |
| H | 5.384165  | 1.968028  | -1.738222 | N           | 2.247893  | -1.228571 | -3.443944 |
| C | 4.781935  | 0.604666  | -0.148228 | H           | 0.945972  | -0.723165 | -4.999222 |
| C | 8.330314  | -2.946316 | -0.732175 | H           | 3.363149  | -1.618937 | -1.714124 |
| H | 7.497813  | -3.677279 | -0.828654 |             |           |           |           |
| H | 8.571451  | -2.808818 | 0.344660  | (S)-L5-TS3A |           |           |           |
| H | 9.220635  | -3.337636 | -1.257355 | Ni          | -0.316844 | 1.366830  | 1.055450  |
| C | 1.213929  | 1.225380  | 4.649121  | P           | -0.914336 | 1.193095  | -0.990816 |
| H | 0.159599  | 0.896591  | 4.626679  | P           | -1.065164 | -0.543083 | 1.824308  |
| H | 1.867351  | 0.335410  | 4.731611  | C           | -2.431033 | 0.177984  | -1.309504 |
| H | 1.369766  | 1.844590  | 5.560695  | C           | -3.631657 | 0.789872  | -1.718731 |
| H | 2.606749  | 2.384877  | 3.359599  | H           | -3.641943 | 1.860016  | -1.969001 |
| C | -0.431016 | -1.511797 | 3.313209  | C           | -4.819907 | 0.055098  | -1.768081 |
| N | 0.770524  | -2.107124 | 3.380626  | H           | -5.770762 | 0.535038  | -2.041948 |
| C | -1.222697 | -1.348243 | 4.469713  | C           | -4.818898 | -1.301738 | -1.410886 |
| C | 1.190351  | -2.525854 | 4.583601  | C           | -3.612365 | -1.960040 | -1.074619 |
| C | -0.682362 | -1.824531 | 5.673116  | C           | -2.410767 | -1.205692 | -1.012156 |
| H | -2.210769 | -0.867704 | 4.442952  | C           | -1.153197 | -1.937123 | -0.647819 |

|    |           |           |           |   |           |           |           |
|----|-----------|-----------|-----------|---|-----------|-----------|-----------|
| C  | -0.579737 | -2.758017 | -1.662206 | C | 3.780096  | -1.057127 | 1.547464  |
| C  | 0.645336  | -3.415540 | -1.397572 | C | 4.912857  | -0.900760 | 0.580744  |
| C  | 1.240070  | -3.332118 | -0.129071 | C | 5.883433  | -1.830506 | 0.211876  |
| H  | 2.193442  | -3.848155 | 0.054054  | H | 5.888623  | -2.829372 | 0.668445  |
| C  | 0.653947  | -2.558251 | 0.875108  | C | 6.830750  | -1.426696 | -0.768160 |
| H  | 1.161536  | -2.481790 | 1.844032  | C | 6.776592  | -0.123539 | -1.328169 |
| C  | -0.529743 | -1.839193 | 0.620816  | H | 7.530858  | 0.138216  | -2.085035 |
| O  | -1.244606 | -2.765543 | -2.849685 | C | 5.793034  | 0.797197  | -0.932177 |
| C  | -1.371695 | -3.956313 | -3.628085 | H | 5.749326  | 1.805294  | -1.371060 |
| H  | -2.337322 | -3.869853 | -4.164837 | C | 4.857727  | 0.394127  | 0.027462  |
| H  | -1.389995 | -4.861841 | -2.986851 | C | 7.930667  | -3.548929 | -0.713234 |
| H  | -0.550319 | -4.054042 | -4.365655 | H | 7.016812  | -4.146139 | -0.926017 |
| O  | -3.516224 | -3.264463 | -0.701081 | H | 8.114144  | -3.543558 | 0.383634  |
| C  | -4.154772 | -4.293696 | -1.462406 | H | 8.794713  | -4.011752 | -1.224130 |
| H  | -3.484218 | -5.174991 | -1.418925 | C | 0.264737  | 0.386903  | -2.121462 |
| H  | -4.289365 | -3.989582 | -2.520725 | C | 0.075835  | -0.061523 | -3.426407 |
| H  | -5.142249 | -4.562546 | -1.036547 | S | 1.840685  | -0.059732 | -1.530420 |
| Cl | 1.527754  | -4.275036 | -2.652760 | C | 1.216802  | -0.744567 | -3.943658 |
| Cl | -6.362908 | -2.127997 | -1.288897 | H | -0.871004 | 0.068295  | -3.968171 |
| C  | 1.439625  | 1.913432  | 3.397533  | C | 2.254027  | -0.819598 | -3.025935 |
| H  | 0.978698  | 1.205343  | 4.108593  | H | 1.267917  | -1.185880 | -4.949169 |
| C  | 0.618317  | 2.547503  | 2.478436  | H | 3.234965  | -1.297124 | -3.142464 |
| C  | 0.363032  | 3.129793  | 1.334723  | C | -1.310346 | 2.753562  | -1.834304 |
| C  | 0.398846  | 4.390900  | 0.620644  | C | -2.036366 | 3.801818  | -1.278017 |
| C  | 1.043639  | 4.454656  | -0.639154 | S | -0.782458 | 3.150571  | -3.450698 |
| H  | 1.522345  | 3.546429  | -1.030960 | C | -2.178584 | 4.913061  | -2.161479 |
| C  | 1.076909  | 5.657424  | -1.353878 | H | -2.423796 | 3.765144  | -0.249995 |
| C  | 0.453801  | 6.809964  | -0.839005 | C | -1.546064 | 4.706417  | -3.376647 |
| H  | 0.468362  | 7.750313  | -1.412061 | H | -2.698834 | 5.845070  | -1.900317 |
| C  | -0.191793 | 6.752731  | 0.408330  | H | -1.462191 | 5.397847  | -4.225319 |
| H  | -0.681480 | 7.650468  | 0.818640  | C | -2.875787 | -0.713168 | 1.897672  |
| C  | -0.216307 | 5.554484  | 1.139861  | C | -3.658984 | -1.853357 | 2.051866  |
| H  | -0.724693 | 5.500927  | 2.114913  | S | -3.863936 | 0.718598  | 1.780944  |
| C  | 2.825177  | 2.396658  | 3.710706  | C | -5.055361 | -1.563505 | 2.069619  |
| H  | 3.498531  | 1.542778  | 3.933573  | H | -3.230926 | -2.862710 | 2.114288  |
| H  | 2.801691  | 3.037548  | 4.621297  | C | -5.318977 | -0.208678 | 1.935827  |
| H  | 3.240741  | 2.984451  | 2.871527  | H | -5.843002 | -2.324781 | 2.157395  |
| H  | 1.582798  | 5.692534  | -2.331206 | H | -6.295318 | 0.291906  | 1.906071  |
| O  | 1.874774  | 0.342018  | 2.007346  | C | -0.637291 | -1.161215 | 3.494128  |
| O  | 3.291461  | 2.251327  | 0.421196  | C | 0.609566  | -1.396176 | 4.069970  |
| O  | 3.479033  | -2.023683 | 2.240884  | S | -1.914374 | -1.374569 | 4.684091  |
| O  | 7.823338  | -2.226000 | -1.232233 | C | 0.527952  | -1.761885 | 5.448734  |
| N  | 3.070330  | 0.163748  | 1.484040  | H | 1.547617  | -1.278400 | 3.509356  |
| C  | 3.689267  | 1.111090  | 0.607238  | C | -0.773143 | -1.777399 | 5.923811  |

|             |           |           |           |   |           |           |           |
|-------------|-----------|-----------|-----------|---|-----------|-----------|-----------|
| H           | 1.404278  | -1.999049 | 6.069664  | H | 0.643502  | 7.730928  | -1.275656 |
| H           | -1.127032 | -2.009231 | 6.937285  | C | -0.030275 | 6.739760  | 0.543427  |
|             |           |           |           | H | -0.468135 | 7.653899  | 0.975465  |
| (S)-L5-TS3B |           |           |           | C | -0.102300 | 5.532413  | 1.256041  |
| Ni          | -0.348031 | 1.327328  | 1.151939  | H | -0.598478 | 5.486875  | 2.237771  |
| P           | -0.928262 | 1.264298  | -0.906491 | C | 0.912097  | 1.298141  | 4.773531  |
| P           | -1.035257 | -0.663919 | 1.767016  | H | 0.876315  | 2.077461  | 5.569762  |
| C           | -2.390123 | 0.216345  | -1.339749 | H | 1.586306  | 0.495527  | 5.127422  |
| C           | -3.607638 | 0.810318  | -1.725811 | H | -0.104289 | 0.882209  | 4.644476  |
| H           | -3.659127 | 1.895883  | -1.889541 | H | 1.643322  | 5.636720  | -2.242347 |
| C           | -4.761047 | 0.032441  | -1.859513 | O | 1.853003  | 0.285715  | 2.260680  |
| H           | -5.726735 | 0.492371  | -2.115117 | O | 3.310988  | 2.313004  | 0.861629  |
| C           | -4.708967 | -1.347700 | -1.609669 | O | 3.448516  | -2.108943 | 2.287809  |
| C           | -3.482567 | -1.980608 | -1.297777 | O | 7.641773  | -2.118332 | -1.360874 |
| C           | -2.317156 | -1.182917 | -1.150747 | N | 3.054884  | 0.140293  | 1.723214  |
| C           | -1.034013 | -1.878467 | -0.812868 | C | 3.680206  | 1.150579  | 0.924619  |
| C           | -0.402610 | -2.590198 | -1.874306 | C | 3.745709  | -1.087553 | 1.672508  |
| C           | 0.852821  | -3.198810 | -1.640316 | C | 4.851206  | -0.875581 | 0.684083  |
| C           | 1.421531  | -3.184482 | -0.357879 | C | 5.777271  | -1.795663 | 0.196565  |
| H           | 2.396605  | -3.664776 | -0.192955 | H | 5.769092  | -2.830735 | 0.563634  |
| C           | 0.778459  | -2.520928 | 0.688961  | C | 6.696599  | -1.333927 | -0.784930 |
| H           | 1.265325  | -2.502909 | 1.669644  | C | 6.662805  | 0.014735  | -1.225423 |
| C           | -0.434798 | -1.839906 | 0.470245  | H | 7.393411  | 0.320871  | -1.988814 |
| O           | -1.044840 | -2.543819 | -3.073551 | C | 5.726371  | 0.924963  | -0.707734 |
| C           | -1.121479 | -3.693392 | -3.918826 | H | 5.697344  | 1.968589  | -1.055447 |
| H           | -2.088824 | -3.618109 | -4.454296 | C | 4.816180  | 0.463779  | 0.249534  |
| H           | -1.102611 | -4.633384 | -3.329355 | C | 7.717826  | -3.487711 | -0.973892 |
| H           | -0.295071 | -3.715035 | -4.657010 | H | 6.773005  | -4.028860 | -1.201210 |
| O           | -3.333805 | -3.303356 | -1.018325 | H | 7.946192  | -3.594381 | 0.109294  |
| C           | -3.932193 | -4.303658 | -1.847853 | H | 8.541286  | -3.929939 | -1.563970 |
| H           | -3.232367 | -5.162816 | -1.851574 | C | 0.328720  | 0.597974  | -2.042952 |
| H           | -4.068775 | -3.939250 | -2.886711 | C | 0.224777  | 0.214543  | -3.377439 |
| H           | -4.913072 | -4.631196 | -1.448959 | S | 1.913570  | 0.246967  | -1.412417 |
| Cl          | 1.794039  | -3.909026 | -2.943943 | C | 1.436713  | -0.345069 | -3.882702 |
| Cl          | -6.220870 | -2.239196 | -1.580199 | H | -0.708259 | 0.298448  | -3.950987 |
| C           | 1.415014  | 1.919854  | 3.511091  | C | 2.442814  | -0.390391 | -2.928950 |
| H           | 2.474279  | 2.240277  | 3.493478  | H | 1.560208  | -0.723219 | -4.907452 |
| C           | 0.593029  | 2.509802  | 2.559693  | H | 3.463422  | -0.780723 | -3.029556 |
| C           | 0.356865  | 3.082023  | 1.410782  | C | -1.376878 | 2.857210  | -1.656525 |
| C           | 0.446512  | 4.348247  | 0.710141  | C | -2.090029 | 3.870545  | -1.025977 |
| C           | 1.076147  | 4.401562  | -0.556840 | S | -0.927007 | 3.326811  | -3.277381 |
| H           | 1.505015  | 3.478555  | -0.972363 | C | -2.278548 | 5.018125  | -1.852968 |
| C           | 1.152627  | 5.611186  | -1.256962 | H | -2.433158 | 3.783825  | 0.014669  |
| C           | 0.594227  | 6.784256  | -0.715088 | C | -1.699906 | 4.869512  | -3.102866 |

|             |           |           |           |    |           |           |           |
|-------------|-----------|-----------|-----------|----|-----------|-----------|-----------|
| H           | -2.794687 | 5.932829  | -1.529646 | O  | -3.555936 | -3.314163 | -0.199674 |
| H           | -1.661665 | 5.596579  | -3.924608 | C  | -4.364262 | -4.361673 | -0.743169 |
| C           | -2.846241 | -0.860620 | 1.774368  | H  | -3.703436 | -5.247163 | -0.820904 |
| C           | -3.624777 | -2.013041 | 1.821802  | H  | -4.746054 | -4.099788 | -1.751111 |
| S           | -3.841482 | 0.571286  | 1.762591  | H  | -5.220711 | -4.600264 | -0.082041 |
| C           | -5.023132 | -1.732639 | 1.839792  | Cl | 1.180761  | -3.965481 | -2.978216 |
| H           | -3.191074 | -3.021970 | 1.811754  | Cl | -6.522332 | -2.221740 | -0.320343 |
| C           | -5.293277 | -0.372526 | 1.816130  | C  | 1.767191  | 2.597149  | 3.198200  |
| H           | -5.807173 | -2.502603 | 1.851769  | H  | 1.366714  | 2.174633  | 4.135983  |
| H           | -6.272162 | 0.124020  | 1.814453  | C  | 0.920706  | 2.934257  | 2.186296  |
| C           | -0.660424 | -1.446945 | 3.381255  | C  | 0.544518  | 3.225244  | 0.964421  |
| C           | 0.551837  | -1.816060 | 3.956970  | C  | 0.450997  | 4.399932  | 0.112442  |
| S           | -1.972538 | -1.635363 | 4.540053  | C  | 0.698352  | 4.305907  | -1.276151 |
| C           | 0.415178  | -2.273727 | 5.303623  | H  | 0.981500  | 3.335044  | -1.705248 |
| H           | 1.517570  | -1.710601 | 3.443490  | C  | 0.590489  | 5.439674  | -2.090953 |
| C           | -0.889072 | -2.212138 | 5.763566  | C  | 0.233951  | 6.681956  | -1.536567 |
| H           | 1.259543  | -2.622825 | 5.915993  | H  | 0.135294  | 7.568009  | -2.183027 |
| H           | -1.278827 | -2.486959 | 6.752801  | C  | 0.006922  | 6.788984  | -0.152364 |
|             |           |           |           | H  | -0.265600 | 7.760466  | 0.289804  |
| (S)-L6-TS3A |           |           |           | C  | 0.120298  | 5.659978  | 0.669848  |
| Ni          | -0.150178 | 1.452303  | 1.052671  | H  | -0.069275 | 5.730287  | 1.752109  |
| P           | -1.201864 | 1.242021  | -0.783070 | C  | 3.240942  | 2.866683  | 3.152827  |
| P           | -0.783697 | -0.453318 | 1.904469  | H  | 3.804664  | 1.928164  | 3.344085  |
| C           | -2.692863 | 0.168427  | -0.895302 | H  | 3.526544  | 3.577241  | 3.961314  |
| C           | -3.954572 | 0.752876  | -1.130837 | H  | 3.545218  | 3.275701  | 2.172470  |
| H           | -4.040871 | 1.823481  | -1.361898 | H  | 0.777582  | 5.349343  | -3.171927 |
| C           | -5.111104 | -0.022900 | -1.021398 | O  | 1.920815  | 0.459554  | 1.830378  |
| H           | -6.104519 | 0.429193  | -1.153589 | O  | 3.180656  | 2.144834  | -0.094595 |
| C           | -5.025513 | -1.379052 | -0.669689 | O  | 3.526073  | -1.923136 | 2.131579  |
| C           | -3.766554 | -2.011338 | -0.515159 | O  | 7.796614  | -2.352739 | -1.394770 |
| C           | -2.593908 | -1.216795 | -0.620127 | N  | 2.989439  | 0.148779  | 1.137900  |
| C           | -1.265807 | -1.892882 | -0.478023 | C  | 3.593028  | 1.022912  | 0.181200  |
| C           | -0.829365 | -2.691003 | -1.574266 | C  | 3.759207  | -1.033763 | 1.322045  |
| C           | 0.489985  | -3.205216 | -1.558772 | C  | 4.865628  | -0.944703 | 0.318423  |
| C           | 1.309840  | -3.049909 | -0.429373 | C  | 5.861845  | -1.875206 | 0.031573  |
| H           | 2.325826  | -3.470255 | -0.437967 | H  | 5.912384  | -2.816946 | 0.594525  |
| C           | 0.852578  | -2.328940 | 0.674974  | C  | 6.779691  | -1.545491 | -1.003644 |
| H           | 1.512208  | -2.192463 | 1.542750  | C  | 6.668974  | -0.313183 | -1.698625 |
| C           | -0.422727 | -1.727303 | 0.647712  | H  | 7.404573  | -0.105767 | -2.489880 |
| O           | -1.710024 | -2.828367 | -2.600839 | C  | 5.657134  | 0.609479  | -1.385557 |
| C           | -1.901096 | -4.098700 | -3.230659 | H  | 5.572997  | 1.564532  | -1.925679 |
| H           | -2.957454 | -4.121477 | -3.562712 | C  | 4.753958  | 0.278784  | -0.368961 |
| H           | -1.723174 | -4.932220 | -2.519645 | C  | 7.963276  | -3.606213 | -0.737384 |
| H           | -1.237984 | -4.224698 | -4.109385 | H  | 7.071462  | -4.257672 | -0.868593 |

|             |           |           |           |    |           |           |           |
|-------------|-----------|-----------|-----------|----|-----------|-----------|-----------|
| H           | 8.160627  | -3.474410 | 0.349081  | C  | -4.161685 | 0.169586  | -1.089709 |
| H           | 8.838392  | -4.088497 | -1.209998 | H  | -4.506924 | 1.208865  | -1.180747 |
| N           | -0.129693 | -1.136980 | 3.370112  | C  | -5.088487 | -0.874348 | -1.174677 |
| C           | -0.030604 | -2.481824 | 3.737455  | H  | -6.158133 | -0.668095 | -1.323355 |
| C           | 0.098812  | -0.346110 | 4.493735  | C  | -4.661488 | -2.200950 | -1.013891 |
| C           | 0.287147  | -2.532552 | 5.086164  | C  | -3.291567 | -2.511024 | -0.843815 |
| H           | -0.173655 | -3.278780 | 3.001151  | C  | -2.354338 | -1.451443 | -0.751115 |
| C           | 0.364048  | -1.181150 | 5.567119  | C  | -0.902052 | -1.822800 | -0.660626 |
| H           | 0.021372  | 0.742442  | 4.415863  | C  | -0.324358 | -2.289419 | -1.884075 |
| H           | 0.461693  | -3.448162 | 5.664658  | C  | 1.058795  | -2.597021 | -1.907246 |
| H           | 0.598633  | -0.857756 | 6.588575  | C  | 1.798462  | -2.609733 | -0.713641 |
| N           | -2.493454 | -0.625553 | 2.242792  | H  | 2.859234  | -2.897777 | -0.748213 |
| C           | -3.179481 | -1.794585 | 2.571032  | C  | 1.216390  | -2.213143 | 0.490124  |
| C           | -3.394048 | 0.440865  | 2.221705  | H  | 1.834297  | -2.210649 | 1.393458  |
| C           | -4.514783 | -1.468922 | 2.749455  | C  | -0.116513 | -1.759042 | 0.520112  |
| H           | -2.656990 | -2.754399 | 2.622100  | O  | -1.201650 | -2.342829 | -2.916873 |
| C           | -4.651186 | -0.054919 | 2.526785  | C  | -0.986069 | -3.090315 | -4.111395 |
| H           | -3.043609 | 1.449323  | 1.974463  | H  | -1.987963 | -3.200691 | -4.569883 |
| H           | -5.317047 | -2.174418 | 2.996583  | H  | -0.566018 | -4.094493 | -3.898712 |
| H           | -5.575748 | 0.532382  | 2.578423  | H  | -0.318396 | -2.553616 | -4.813709 |
| N           | -0.243093 | 0.612702  | -2.099114 | O  | -2.804184 | -3.772151 | -0.703456 |
| C           | 1.154298  | 0.602230  | -2.072657 | C  | -3.108682 | -4.763298 | -1.692593 |
| C           | -0.683306 | -0.052447 | -3.247951 | H  | -2.184422 | -5.356396 | -1.843227 |
| C           | 1.597645  | -0.063610 | -3.203187 | H  | -3.400597 | -4.295248 | -2.654685 |
| H           | 1.682085  | 1.101815  | -1.255520 | H  | -3.924863 | -5.432233 | -1.352076 |
| C           | 0.436911  | -0.479431 | -3.943328 | Cl | 1.953824  | -2.899214 | -3.389220 |
| H           | -1.750741 | -0.214211 | -3.425761 | Cl | -5.864194 | -3.470850 | -0.928568 |
| H           | 2.647384  | -0.242803 | -3.464754 | C  | 1.614091  | 2.180881  | 3.093194  |
| H           | 0.423591  | -1.054679 | -4.876747 | C  | 0.703412  | 2.741657  | 2.226541  |
| N           | -1.841489 | 2.718352  | -1.481503 | C  | 0.054333  | 3.186322  | 1.197765  |
| C           | -2.013809 | 3.025090  | -2.830746 | C  | -0.213887 | 4.340011  | 0.353927  |
| C           | -2.414480 | 3.726440  | -0.706556 | C  | 0.592812  | 4.541531  | -0.794240 |
| C           | -2.688222 | 4.235908  | -2.906909 | H  | 1.423799  | 3.848888  | -0.986231 |
| H           | -1.618430 | 2.364309  | -3.608995 | C  | 0.329647  | 5.616661  | -1.654303 |
| C           | -2.945937 | 4.677270  | -1.565110 | C  | -0.732170 | 6.499229  | -1.386112 |
| H           | -2.364046 | 3.680421  | 0.386583  | H  | -0.942490 | 7.336644  | -2.069728 |
| H           | -2.949710 | 4.761762  | -3.833469 | C  | -1.528416 | 6.305205  | -0.244257 |
| H           | -3.442619 | 5.605714  | -1.259784 | H  | -2.365114 | 6.988457  | -0.031308 |
|             |           |           |           | C  | -1.275053 | 5.232912  | 0.622683  |
| (S)-L6-TS3B |           |           |           | H  | -1.902214 | 5.071108  | 1.510617  |
| Ni          | -0.476369 | 1.335982  | 1.245017  | H  | 0.960051  | 5.763624  | -2.545469 |
| P           | -1.587346 | 1.225728  | -0.535842 | O  | 1.986467  | 0.456417  | 1.746019  |
| P           | -0.676964 | -0.704775 | 1.923161  | O  | 3.032825  | 2.386089  | -0.063840 |
| C           | -2.801988 | -0.112045 | -0.845439 | O  | 3.942828  | -1.658191 | 2.028540  |

|   |           |           |           |   |           |           |          |
|---|-----------|-----------|-----------|---|-----------|-----------|----------|
| O | 8.310334  | -1.310400 | -1.384207 | H | 2.100931  | -1.509388 | 3.118672 |
| N | 3.131322  | 0.346474  | 1.097631  | C | -0.077461 | -1.997624 | 5.617891 |
| C | 3.607463  | 1.332067  | 0.175989  | H | -1.960102 | -1.448771 | 4.503412 |
| C | 4.057272  | -0.710734 | 1.255377  | H | 2.168306  | -2.330381 | 5.710356 |
| C | 5.156821  | -0.427140 | 0.281264  | H | -0.436810 | -2.236994 | 6.626580 |
| C | 6.287087  | -1.188391 | -0.008125 | N | -2.328032 | -1.230575 | 2.142200 |
| H | 6.461827  | -2.136131 | 0.518529  | C | -2.791940 | -2.544589 | 2.195986 |
| C | 7.175007  | -0.680775 | -0.996454 | C | -3.399743 | -0.357434 | 2.329526 |
| C | 6.903125  | 0.553007  | -1.643725 | C | -4.160650 | -2.502365 | 2.406832 |
| H | 7.621986  | 0.901299  | -2.400045 | H | -2.105855 | -3.383951 | 2.044285 |
| C | 5.758311  | 1.302423  | -1.329103 | C | -4.546258 | -1.118953 | 2.492110 |
| H | 5.551255  | 2.258887  | -1.832278 | H | -3.227785 | 0.724743  | 2.320526 |
| C | 4.883852  | 0.796349  | -0.360239 | H | -4.824744 | -3.373031 | 2.463050 |
| C | 8.643567  | -2.555446 | -0.774476 | H | -5.559233 | -0.727462 | 2.643977 |
| H | 7.861751  | -3.323524 | -0.962638 |   |           |           |          |
| H | 8.790637  | -2.445792 | 0.322270  |   |           |           |          |
| H | 9.592593  | -2.881121 | -1.238002 |   |           |           |          |
| C | 1.251904  | 1.614096  | 4.428260  |   |           |           |          |
| H | 0.161072  | 1.454485  | 4.521757  |   |           |           |          |
| H | 1.757205  | 0.640099  | 4.589929  |   |           |           |          |
| H | 1.595428  | 2.299758  | 5.235128  |   |           |           |          |
| H | 2.680244  | 2.408432  | 2.911417  |   |           |           |          |
| N | -2.570133 | 2.639566  | -0.895042 |   |           |           |          |
| C | -2.729754 | 3.315157  | -2.101074 |   |           |           |          |
| C | -3.502041 | 3.120754  | 0.024537  |   |           |           |          |
| C | -3.765154 | 4.228261  | -1.943976 |   |           |           |          |
| H | -2.071584 | 3.103563  | -2.949598 |   |           |           |          |
| C | -4.260913 | 4.098478  | -0.604403 |   |           |           |          |
| H | -3.530831 | 2.724159  | 1.045538  |   |           |           |          |
| H | -4.110315 | 4.935383  | -2.708059 |   |           |           |          |
| H | -5.065846 | 4.680357  | -0.139246 |   |           |           |          |
| N | -0.579609 | 1.092219  | -1.951264 |   |           |           |          |
| C | -0.949293 | 0.704369  | -3.244023 |   |           |           |          |
| C | 0.814709  | 1.151666  | -1.871706 |   |           |           |          |
| C | 0.212979  | 0.537263  | -3.980396 |   |           |           |          |
| H | -2.001674 | 0.544014  | -3.498657 |   |           |           |          |
| C | 1.326985  | 0.817345  | -3.112729 |   |           |           |          |
| H | 1.293119  | 1.432095  | -0.927981 |   |           |           |          |
| H | 0.261302  | 0.236223  | -5.034303 |   |           |           |          |
| H | 2.391562  | 0.768725  | -3.370048 |   |           |           |          |
| N | -0.057732 | -1.413837 | 3.434422  |   |           |           |          |
| C | 1.264906  | -1.669343 | 3.806226  |   |           |           |          |
| C | -0.877994 | -1.597395 | 4.558816  |   |           |           |          |
| C | 1.272839  | -2.050988 | 5.141364  |   |           |           |          |
